# Supplementary material for: Association between sn-2 fatty acid profiles of breast milk and development of the infant intestinal microbiome
Source: Royal Society of Chemistry journal article supplement (doi:10.1039/c7fo00088j), 2017-12-04
Supplement: c7fo00088j1.pdf [file c7fo00088j1.pdf]

## Additional Materials

**Additional Table 1.** **a**, Correlation of human breast milk *sn*-2 fatty acids with infant's gut microbiome by Spearman correlation; **b**, Partial correlation of human breast milk *sn*-2 fatty acids with infant's gut microbiome at 13-15 d; **c**, Partial correlation of human breast milk *sn*-2 fatty acids with infant's gut microbiome at 1 m; **d**, Partial correlation of human breast milk *sn*-2 fatty acids with infant's gut microbiome at 2 m.

**Additional Figure 1.** Rarefaction curves of 16S rRNA gut microbiome samples.

**Additional Figure 2.** Differences of gut microbiome taxa at phylum level by phases using Kruskal-Wallis test with posthoc analysis. The star symbol indicates a significant difference ( $P < 0.05$ ). "ns":  $p > 0.05$ , "\*":  $p \leq 0.05$ , "\*\*\*":  $p \leq 0.01$ , "\*\*\*\*":  $p \leq 0.001$ , "\*\*\*\*\*":  $p \leq 0.0001$ . Number in x-axis indicate the separate breastfeeding stages: 0-3 d, 13-15 d, 1 m, 2 m, 3 m, and 4 m.

**Additional Figure 3.** Differences of gut microbiome taxa at family level by phases using Kruskal-Wallis test with posthoc analysis. The star symbol indicates a significant difference ( $P < 0.05$ ). "ns":  $p > 0.05$ , "\*":  $p \leq 0.05$ , "\*\*\*":  $p \leq 0.01$ , "\*\*\*\*":  $p \leq 0.001$ , "\*\*\*\*\*":  $p \leq 0.0001$ . Number in x-axis indicate the separate breastfeeding stages: 0-3 d, 13-15 d, 1 m, 2 m, 3 m, and 4 m.

**Additional Figure 4.** Differences of gut microbiome taxa at genus level by phases using Kruskal-Wallis test with posthoc analysis. The star symbol indicates a significant difference ( $P < 0.05$ ). "ns":  $p > 0.05$ , "\*":  $p \leq 0.05$ , "\*\*\*":  $p \leq 0.01$ , "\*\*\*\*":  $p \leq 0.001$ , "\*\*\*\*\*":  $p \leq 0.0001$ . Number in x-axis indicate the separate breastfeeding stages: 0-3 d, 13-15 d, 1 m, 2 m, 3 m, and 4 m.
