# Supplementary material for: Association between sn-2 fatty acid profiles of breast milk and development of the infant intestinal microbiome
Source: Royal Society of Chemistry journal article supplement (doi:10.1039/c7fo00088j), 2017-12-04
Supplement: c7fo00088j6.xlsx [file c7fo00088j6.xlsx]

## Sheet: a-SpearmanCorrelation
	age	term	height	weight_after_labor	college_undergraduate	senior_middle_school_Secondary	secondary	master	junior_middle_school	region	method	sex	Day3_5	Day13_15	Day30	Day60	Day90	Day120	beta_PA	C10	C12	C14	C16	C18	C18_1	C18_2	C18_3	C20_4n6	C22_6n3	p__Verrucomicrobia__g__Akkermansia__s__muciniphila_588471	p__Proteobacteria__g__Trabulsiella_572750	p__Proteobacteria__g__Sutterella_4338624	p__Proteobacteria__g__Sutterella_4095596	p__Proteobacteria__g__Sutterella_359809	p__Proteobacteria__g__Sutterella_215097	p__Proteobacteria__g__Sutterella_194360	p__Proteobacteria__g__Sutterella_189076	p__Proteobacteria__g__Sutterella_112891	p__Proteobacteria__g__Shigella__s__sonnei_2072645	p__Proteobacteria__g__Serratia_808486	p__Proteobacteria__g__Serratia_3159130	p__Proteobacteria__g__Proteus_768553	p__Proteobacteria__g__Ochrobactrum_256276	p__Proteobacteria__g__Ochrobactrum_2458172	p__Proteobacteria__g__Morganella__s__morganii_4477719	p__Proteobacteria__g__Klebsiella_813217	p__Proteobacteria__g__Haemophilus__s__parainfluenzae_4296080	p__Proteobacteria__g__Haemophilus_341460	p__Proteobacteria__g__Haemophilus_153997
age
term	-0.02
height	-0.07	-0.2
weight_after_labor	-0.01	-0.21	0.40*
college_undergraduate	-0.01	-0.08	-0.19	0.24
senior_middle_school_Secondary	0.17	-0.19	-0.04	-0.08	-0.53***
secondary	-0.43*	0.15	0.43*	0.06	-0.41*	-0.12
master	0.31	0.13	0.28	-0.36	-0.36	-0.11	-0.08
junior_middle_school	-0.06	0.13	-0.34	-0.06	-0.36	-0.11	-0.08	-0.07
region	0.36	-0.2	0.52**	0.27	0.08	0.17	0.13	0.11	-0.64***
method	0.01	0.07	-0.11	-0.40*	0.16	0.24	-0.22	-0.19	-0.19	0.1
sex	0.05	0.11	0.23	-0.06	-0.35	-0.11	0.13	0.34	0.34	-0.05	0.09
Day3_5	-0.02	0.15	-0.06	-0.09	0.1	0.06	-0.09	-0.08	-0.08	0.13	0.17	0.01
Day13_15	0.08	-0.16	0	0.02	0.02	0.25	-0.13	-0.11	-0.11	0.18	0.29	-0.05	-0.13
Day30	-0.02	-0.08	0.1	-0.01	0	-0.03	0.08	-0.02	-0.02	0.06	0.02	-0.05	-0.19	-0.27
Day60	-0.1	-0.02	0.07	0.03	-0.05	0	0.1	0	0	-0.08	-0.01	0.01	-0.18	-0.25	-0.37
Day90	0.04	0.18	-0.09	0.04	-0.06	-0.15	0.08	0.11	0.11	-0.14	-0.26	0.03	-0.11	-0.16	-0.23	-0.21
Day120	0.06	0.02	-0.1	0	0.02	-0.13	-0.1	0.13	0.13	-0.17	-0.24	0.08	-0.1	-0.14	-0.21	-0.2	-0.12
beta_PA	0.2	-0.08	0.26	0.28	0.14	0.23	-0.11	-0.08	-0.38	0.49**	0.22	-0.22	0.06	0.11	0.17	-0.03	-0.17	-0.22
C10	-0.13	-0.12	0.28	0.11	-0.03	0.01	0.1	-0.09	0	0.29	0.27	0.04	-0.16	0.25	-0.05	-0.03	-0.07	0.03	0.3
C12	-0.14	-0.09	0.28	0.22	0	0.08	0.26	-0.18	-0.23	0.39*	0.27	-0.02	-0.19	0.23	-0.13	0.08	-0.06	0.05	0.34	0.66***
C14	0.04	-0.08	0.32	0.24	0.02	0.18	0.01	-0.06	-0.24	0.39	0.21	-0.16	-0.11	0.23	-0.14	0.01	-0.09	0.12	0.52**	0.64***	0.73***
C16	-0.07	-0.33	-0.21	-0.16	-0.17	0.1	-0.18	0.15	0.24	-0.34	-0.15	0.14	-0.15	0.11	0.17	-0.12	-0.15	0.08	-0.17	-0.13	-0.26	-0.32
C18	0.14	0.11	-0.06	-0.09	0.02	-0.05	-0.13	0.14	0.03	0.07	0.07	0.01	-0.03	0.26	-0.02	0	-0.22	-0.03	0.11	0.07	-0.09	-0.1	0.06
C18_1	0.04	0.31	-0.07	-0.11	-0.01	-0.08	0.18	0.08	-0.14	-0.01	-0.17	-0.06	0.02	-0.28	0.1	0.1	0.14	-0.13	-0.18	-0.49**	-0.28	-0.32	-0.32	-0.09
C18_2	0.05	0.18	0.05	0.06	0.13	-0.17	-0.12	0.04	0.08	-0.08	-0.08	0.15	0.07	-0.26	-0.08	0.2	0.18	-0.12	-0.2	-0.18	-0.35	-0.2	-0.29	-0.15	0.23
C18_3	-0.14	-0.02	-0.07	-0.18	-0.06	-0.09	0	0.01	0.23	-0.08	0.17	0.16	-0.07	0.15	-0.06	0.14	-0.25	0.04	-0.01	0.3	0.01	-0.01	0.04	0.28	-0.27	-0.04
C20_4n6	-0.21	-0.13	0.22	0.11	0.18	-0.07	0.02	-0.19	-0.1	0.19	0.25	0.15	0.21	0.13	-0.13	0.01	-0.25	0.1	0.06	0.37	0.27	0.26	-0.21	-0.06	-0.23	0.04	0.49**
C22_6n3	0.23	-0.27	-0.01	-0.23	-0.2	0.27	-0.04	0.25	-0.2	0.26	-0.16	-0.19	0.05	0.13	-0.16	-0.01	-0.16	0.22	0.08	0.1	0.07	0.05	0.13	0.42*	-0.17	-0.34	0.12	-0.04
p__Verrucomicrobia__g__Akkermansia__s__muciniphila_588471	-0.03	0.06	-0.16	-0.03	-0.18	-0.05	-0.04	-0.04	0.49**	-0.31	-0.09	0.16	-0.04	-0.06	-0.08	-0.08	-0.05	0.39	-0.21	0.12	0	0.04	0.22	0.06	-0.19	-0.16	0.2	0.21	-0.05
p__Proteobacteria__g__Trabulsiella_572750	0.14	0	-0.07	-0.19	-0.03	0.34	-0.14	-0.12	-0.12	0.19	0.45*	0.12	0.33	0.34	-0.2	-0.06	-0.16	-0.15	-0.1	-0.01	0.01	-0.02	-0.15	-0.04	0	0.03	0.1	0.17	-0.04	-0.06
p__Proteobacteria__g__Sutterella_4338624	0	0.09	-0.23	-0.17	0.14	-0.07	-0.06	-0.05	-0.05	0.08	0.07	0.05	-0.06	-0.08	0.09	-0.11	0.22	-0.06	0.2	-0.02	0.01	-0.05	-0.1	0	0.22	0.01	-0.01	-0.11	0.04	-0.02	-0.08
p__Proteobacteria__g__Sutterella_4095596	0.15	-0.02	-0.03	0.3	0.23	-0.12	-0.09	-0.08	-0.08	-0.04	-0.22	-0.11	-0.09	-0.13	0.08	-0.18	0.07	0.31	-0.11	-0.13	0	-0.02	-0.2	-0.13	0.04	0.06	-0.2	-0.05	-0.08	-0.04	-0.14	-0.06
p__Proteobacteria__g__Sutterella_359809	0.25	-0.05	0.15	0.2	0.07	-0.11	-0.08	0.18	-0.07	0.11	-0.19	0.06	-0.08	-0.11	-0.02	-0.16	0.3	0.14	-0.08	0.01	0.14	0.08	-0.15	-0.13	0.04	0.01	-0.27	-0.06	0.01	-0.04	-0.12	-0.05	0.67***
p__Proteobacteria__g__Sutterella_215097	-0.06	-0.13	-0.14	0	0.09	-0.05	0.04	-0.17	0.02	0.14	-0.09	-0.15	-0.19	-0.18	0.25	-0.07	0.08	0.05	-0.02	0.03	0.06	0.06	-0.2	0.06	0.05	0.02	-0.01	-0.07	0.05	-0.08	-0.28	0.3	0.19	0.25
p__Proteobacteria__g__Sutterella_194360	0.01	0.11	-0.01	0.04	0.17	-0.09	-0.07	-0.06	-0.06	0.1	0.17	0.14	0.21	-0.1	0.03	-0.14	0.15	-0.08	0.22	0.01	-0.03	0.08	-0.09	0.03	0.09	0.28	-0.09	0.14	-0.15	-0.03	-0.1	0.36	-0.07	-0.06	0.17
p__Proteobacteria__g__Sutterella_189076	0.2	-0.09	0.09	0.32	0.17	-0.09	-0.07	-0.06	-0.06	0.1	-0.17	-0.02	-0.07	-0.1	0.02	-0.14	0.15	0.19	-0.01	-0.02	0.18	0.1	-0.26	-0.02	0.01	-0.02	-0.25	-0.05	0.01	-0.03	-0.1	-0.04	0.78***	0.87***	0.33	-0.05
p__Proteobacteria__g__Sutterella_112891	0.16	-0.23	0.11	0.03	0.06	-0.11	-0.08	0.19	-0.07	0.11	-0.05	0.07	-0.08	-0.11	0.12	-0.16	0.11	0.14	-0.02	0.11	0.18	0.23	-0.01	-0.24	-0.12	0	-0.13	-0.04	0.1	-0.04	-0.12	-0.05	0.43*	0.73***	0.28	-0.06	0.56***
p__Proteobacteria__g__Shigella__s__sonnei_2072645	-0.26	0.26	-0.3	-0.18	-0.14	-0.13	-0.03	-0.02	0.49**	-0.66***	-0.07	0.2	0.11	-0.1	-0.11	-0.05	0.17	0.08	-0.28	-0.16	-0.21	-0.26	0.29	-0.21	-0.01	0.03	-0.08	0	-0.25	0.28	-0.18	-0.1	-0.05	-0.03	-0.19	0.04	-0.13	-0.02
p__Proteobacteria__g__Serratia_808486	0.07	0.1	-0.14	-0.14	-0.28	0.26	-0.13	0.07	0.26	-0.2	0.02	-0.05	-0.13	0.21	-0.05	-0.13	0.11	0.02	-0.03	-0.02	0	0.06	-0.04	0.17	0.12	-0.09	-0.08	-0.19	0.12	-0.06	0.08	-0.08	-0.13	-0.11	-0.13	-0.1	-0.1	-0.11	0.09
p__Proteobacteria__g__Serratia_3159130	0.07	0.06	-0.16	-0.1	0.1	-0.05	-0.04	-0.04	-0.04	0.06	-0.09	-0.1	-0.04	-0.06	-0.08	-0.08	-0.05	0.39	-0.13	-0.07	0.08	0.12	-0.04	0.02	0.16	0.03	-0.11	0.05	0.15	-0.02	-0.06	-0.02	-0.04	-0.04	0.26	-0.03	-0.03	-0.04	-0.07	-0.06
p__Proteobacteria__g__Proteus_768553	0.02	0.13	0	0.05	0.05	0.1	-0.08	-0.07	-0.07	0.11	0.23	0.06	-0.08	-0.11	-0.03	0.16	0.11	-0.09	0.27	0.12	0.26	0.13	-0.33	-0.23	0.09	0.2	0.08	-0.01	-0.28	-0.04	0.07	0.31	-0.08	-0.07	-0.04	-0.06	-0.06	-0.07	-0.15	-0.11	-0.04
p__Proteobacteria__g__Ochrobactrum_256276	0.04	0.16	-0.07	-0.07	0.08	-0.09	0.07	-0.02	-0.08	0.23	0.11	0.06	0.47**	-0.26	0.01	-0.07	0.1	-0.14	0.06	-0.03	-0.01	-0.02	-0.17	-0.09	0.09	0.06	-0.08	0.13	-0.08	-0.1	0.05	0.25	-0.11	-0.03	0.24	0.3	-0.17	0.09	0.02	-0.22	0.15	-0.08
p__Proteobacteria__g__Ochrobactrum_2458172	-0.01	0.2	-0.05	-0.17	0.07	0	0.08	-0.05	-0.16	0.25	0.25	0.08	0.61***	-0.17	0.17	-0.25	-0.04	-0.2	0.24	-0.02	-0.02	-0.04	-0.01	-0.18	0.07	0.01	-0.14	0.1	-0.12	-0.08	0.08	0.25	-0.18	-0.05	0.07	0.37	-0.14	0.09	0.09	-0.15	-0.08	-0.02	0.64***
p__Proteobacteria__g__Morganella__s__morganii_4477719	0.01	-0.09	0.06	-0.05	0.02	-0.09	-0.07	0.23	-0.06	-0.12	-0.17	0.13	-0.07	-0.1	-0.15	-0.14	0.15	0.44*	-0.21	0.03	-0.04	-0.01	0.1	-0.34	-0.09	0.16	-0.14	0.04	0.04	-0.03	-0.1	-0.04	0.50**	0.55***	0.01	-0.05	0.32	0.56***	0.17	-0.1	-0.03	-0.06	0.02	-0.01
p__Proteobacteria__g__Klebsiella_813217	-0.21	-0.18	0.12	-0.03	0.01	0.18	-0.29	-0.1	0.14	-0.14	0.44*	0.32	0.1	0.1	0.11	-0.11	-0.27	0.07	0.13	0.19	0.06	0.17	0.13	-0.01	-0.3	0.03	0.31	0.38	-0.16	-0.05	0.26	-0.05	-0.14	-0.1	-0.1	0.17	-0.08	0.05	0.08	0.08	-0.11	0	0.05	0.05	0.06
p__Proteobacteria__g__Haemophilus__s__parainfluenzae_4296080	0.08	0.09	0	-0.13	-0.27	0.24	0.05	0.06	0.07	0.05	0.01	-0.15	-0.13	0.35	0.05	-0.25	0.12	-0.14	0.13	-0.03	0.03	0.11	-0.01	0.03	0.03	-0.11	-0.16	-0.2	0.06	-0.06	0.06	0.14	-0.13	-0.11	-0.06	0.08	-0.1	-0.11	-0.11	0.60***	-0.06	-0.11	-0.1	0.12	-0.1	-0.08
p__Proteobacteria__g__Haemophilus_341460	0.17	0.1	0.1	-0.12	-0.24	0.14	-0.04	0.29	0.02	0.23	-0.12	-0.08	-0.25	0.14	0.18	-0.18	0.02	0.03	0.11	0.14	0.03	0.24	0.02	-0.02	-0.03	-0.06	-0.12	-0.11	0.09	0.02	-0.19	0.15	-0.21	-0.14	0.15	-0.05	-0.23	-0.14	-0.14	0.31	0.2	-0.1	0	0.07	-0.08	-0.2	0.57***
p__Proteobacteria__g__Haemophilus_153997	0.13	-0.36	0.14	0	0.12	-0.11	-0.01	0.09	-0.16	0.15	0.03	0	-0.18	-0.15	-0.01	0.32	-0.21	0.13	-0.04	-0.16	0.12	-0.02	-0.09	-0.12	0.05	0.06	0.08	0.16	0.04	-0.08	0.06	-0.11	-0.04	0	0.05	-0.13	0.04	0.18	-0.24	-0.16	0.15	0.18	0.01	-0.16	0.04	0.07	-0.03	-0.09
p__Proteobacteria__g__Geobacter_3950373	-0.02	0.11	-0.15	-0.1	0.17	-0.09	-0.07	-0.06	-0.06	0.1	0.17	0.14	0.49**	-0.1	-0.15	-0.14	0.15	-0.08	-0.01	-0.08	-0.13	-0.03	-0.08	-0.01	0.14	0.22	-0.11	0.06	-0.09	-0.03	0.12	0.36	-0.07	-0.06	0.04	0.62***	-0.05	-0.06	-0.13	-0.1	-0.03	-0.06	0.34	0.39	-0.05	0.07	0.08	-0.05	-0.13
p__Proteobacteria__g__Erwinia_922761	0.05	-0.21	0.01	-0.02	0.07	0.2	-0.15	-0.26	0.02	0.02	0.41*	0.18	0.22	0.33	-0.06	-0.16	-0.26	-0.01	0.1	0.12	0.01	0.14	0.06	0.06	-0.33	-0.11	0.21	0.35	0	-0.03	0.54***	-0.15	-0.18	-0.18	-0.23	0.07	-0.12	0	-0.09	0.24	-0.15	-0.21	0	0.09	-0.06	0.57***	0.08	-0.22	0
p__Proteobacteria__g__Enterobacter__s__cloacae_210269	0	0.02	0.22	0.02	-0.1	0.21	0.01	0.02	-0.13	0.2	0.32	0.33	0.16	0.31	-0.02	-0.18	-0.17	-0.03	0.06	0.04	0.1	0.09	0.08	0.14	-0.19	0.02	0.08	0.38	0	-0.06	0.3	-0.09	-0.14	-0.13	-0.23	0.24	-0.11	-0.13	-0.04	0.15	-0.06	-0.13	-0.03	0.12	-0.11	0.37	0.16	0.01	-0.11
p__Proteobacteria__g__Enhydrobacter_574102	0.16	0.21	-0.15	-0.16	0.02	0	-0.16	0.15	-0.01	0.19	0.11	0.14	0.53***	-0.14	-0.15	-0.03	0.12	-0.19	0.08	0.04	-0.06	-0.01	-0.02	-0.07	-0.13	0.07	-0.1	0	0.04	-0.1	0.09	0.17	-0.23	-0.06	0	0.15	-0.18	0.08	0.05	-0.16	-0.1	0.02	0.61***	0.57***	0	0	-0.15	-0.02	-0.18
p__Proteobacteria__g__Delftia_1117255	-0.12	0.21	0.15	-0.05	0.1	-0.12	0.14	-0.02	-0.17	0.26	0.23	0.11	0.56***	-0.26	0.05	-0.09	0.06	-0.21	0.16	0.13	0.13	0.05	-0.26	-0.22	0.16	0.12	-0.03	0.28	-0.19	-0.08	0.14	0.21	-0.07	-0.02	-0.07	0.37	-0.14	-0.02	0.05	-0.26	-0.08	0.12	0.69***	0.68***	0.02	0.17	-0.1	-0.08	-0.06
p__Proteobacteria__g__Cronobacter__s__dublinensis_667570	-0.15	0.19	0.04	0	0.29	-0.16	-0.12	-0.11	-0.11	0.02	0.26	0	0.41*	0.11	0.07	-0.23	-0.14	-0.13	-0.01	0.03	-0.08	-0.13	-0.12	0.03	-0.17	0.18	0.1	0.25	-0.1	-0.05	0.26	-0.07	0.03	-0.11	-0.16	0.14	-0.09	-0.11	0.14	-0.02	-0.05	-0.11	0.27	0.26	-0.09	0.24	-0.02	-0.12	-0.23
p__Proteobacteria__g__Comamonas_581921	0.04	0.13	0.04	0.04	-0.08	0.1	0.15	-0.07	-0.07	0.11	-0.04	-0.08	0.41*	-0.11	-0.02	-0.16	0.1	-0.09	0.08	-0.08	0.11	0.16	-0.25	-0.13	-0.08	-0.22	-0.13	0.04	0.12	-0.04	0.04	-0.05	0.18	0.2	0.1	-0.06	0.25	0.19	0.17	-0.11	-0.04	-0.07	0.25	0.19	-0.06	-0.1	-0.11	-0.16	-0.16
p__Proteobacteria__g__Citrobacter_674696	0.29	-0.09	0.03	0.02	0	0.26	-0.12	-0.11	-0.11	0.17	0.24	-0.11	-0.12	0.25	0.07	-0.11	-0.14	0.03	0.03	0.03	0.11	0.18	-0.21	-0.03	0.07	-0.05	-0.09	0.14	0.07	-0.05	0.51**	-0.07	0.03	-0.11	-0.25	-0.09	-0.09	-0.11	-0.22	0.42*	-0.05	-0.11	-0.13	-0.15	-0.09	0.17	0.26	0.19	0.05
p__Proteobacteria__g__Citrobacter_280706	0.05	-0.24	0	-0.01	0.16	0.01	-0.11	-0.1	-0.1	0.16	0.3	0.02	0.06	0.15	0.01	-0.09	-0.13	0.04	0	0.03	0.08	0.1	-0.05	0	-0.08	0.01	0.11	0.18	0.02	-0.05	0.55***	-0.07	-0.11	-0.1	-0.1	-0.08	-0.08	0.13	-0.2	0.14	-0.05	-0.1	0.01	0.02	-0.08	0.31	0.01	-0.12	0.2
p__Proteobacteria__g__Bilophila_361170	0.21	-0.07	-0.02	0.50**	0.13	0.08	-0.18	-0.01	-0.16	0.24	-0.27	-0.25	-0.04	-0.03	0.01	-0.05	0.16	-0.04	0.19	-0.01	0.12	0.05	0.07	0.02	-0.03	-0.18	-0.29	-0.32	0.06	-0.08	-0.16	0.07	0.24	0.26	-0.01	-0.13	0.19	0.11	-0.25	-0.03	-0.08	0.16	0.09	-0.03	0.02	-0.32	-0.02	0.07	-0.15
p__Proteobacteria__g__Acinetobacter__s__johnsonii_1896186	0.2	0.01	0.06	-0.05	0.02	-0.09	-0.07	0.14	0.02	0.12	-0.12	0.18	0.61***	-0.24	-0.12	-0.16	0.12	0.01	-0.11	-0.2	-0.33	-0.2	0.04	-0.13	0.02	0.16	-0.09	0.12	0.04	-0.08	0.16	0.09	-0.17	0	-0.15	0.24	-0.13	0	0.04	-0.24	0.15	-0.16	0.47**	0.35	0.05	0.09	-0.16	-0.1	0.05
p__Proteobacteria__g__Acinetobacter_405425	0	0.15	-0.1	-0.19	-0.03	0.06	0.12	-0.08	-0.08	0.13	0.17	0.01	0.57***	-0.13	-0.06	-0.18	0.08	-0.1	0.04	-0.19	-0.09	-0.05	-0.13	-0.06	0.16	0.06	-0.24	-0.05	-0.07	-0.04	0.16	0.27	-0.09	-0.08	0.09	0.49**	-0.07	-0.08	-0.05	-0.13	-0.04	-0.08	0.50**	0.53**	-0.07	0.04	0.19	-0.05	-0.02
p__Proteobacteria__g__Acinetobacter_3453734	0.02	0.13	-0.18	-0.21	0.06	0.09	-0.08	-0.07	-0.07	0.11	0.38	0.2	0.66***	-0.11	-0.03	-0.16	-0.1	-0.09	0.1	-0.11	0.01	-0.07	-0.03	0.08	0.08	0	-0.06	0.08	-0.04	-0.04	0.22	0.31	-0.08	-0.07	-0.04	0.26	-0.06	-0.07	-0.03	-0.11	-0.04	0.17	0.42*	0.53**	-0.06	0.16	-0.11	-0.2	-0.16
p__Proteobacteria__g__Acinetobacter_219826	-0.18	-0.19	0.24	0.18	-0.17	0.18	-0.03	0.12	0.01	0.12	-0.01	0.22	0.17	0.01	-0.07	-0.03	0.01	-0.05	-0.05	0.18	0.19	0.26	0.01	-0.02	-0.15	0.01	-0.1	0.1	0.01	-0.07	0	-0.1	0.16	0.32	0.18	0.09	0.27	0.32	-0.15	0.2	-0.07	-0.14	0.22	0.08	0.2	0.29	0.09	0.03	-0.15
p__Proteobacteria__f__Sphingomonadaceae_860929	-0.02	0.15	-0.06	-0.09	0.09	0.06	-0.09	-0.08	-0.08	0.13	0.16	0	1.00***	-0.13	-0.19	-0.18	-0.11	-0.1	0.06	-0.15	-0.18	-0.11	-0.15	-0.03	0.02	0.07	-0.07	0.2	0.05	-0.04	0.34	-0.06	-0.09	-0.08	-0.19	0.19	-0.07	-0.08	0.11	-0.13	-0.04	-0.08	0.47**	0.61***	-0.07	0.09	-0.13	-0.25	-0.17
p__Proteobacteria__f__Enterobacteriaceae_9710	0.01	-0.02	-0.27	-0.22	-0.07	0.23	-0.17	-0.15	0.15	-0.18	0.14	-0.01	0.42*	0.23	-0.2	-0.05	-0.1	-0.19	-0.04	0	-0.24	-0.22	0.15	0.06	-0.05	-0.15	0.11	-0.05	0.11	-0.07	0.43*	-0.1	-0.17	-0.15	-0.24	-0.13	-0.13	-0.15	0.21	0.18	-0.07	0.02	0.04	0.1	-0.13	0.1	-0.04	-0.27	-0.22
p__Proteobacteria__f__Enterobacteriaceae_820346	0.02	-0.16	-0.07	-0.04	0.23	-0.12	-0.09	-0.08	-0.08	0.13	0.05	0.02	0.34	0.21	-0.06	-0.18	-0.11	-0.1	0.04	0.11	-0.11	-0.17	0.22	0.13	-0.21	-0.22	0.1	0.02	0.13	-0.04	0.37	-0.06	-0.09	-0.08	-0.19	-0.07	-0.07	-0.08	-0.17	-0.13	-0.04	-0.08	0.07	0.14	-0.07	-0.02	-0.13	-0.26	-0.17
p__Proteobacteria__f__Enterobacteriaceae_816702	0.07	-0.22	0.2	0.14	-0.03	0.21	-0.22	-0.09	0.1	0.1	0.27	0.16	0	0.24	0.3	-0.28	-0.26	-0.05	0.22	0.24	0.01	0.18	-0.01	0.18	-0.28	0.19	0.26	0.36	-0.05	-0.09	0.16	-0.13	-0.01	-0.06	0.03	0.17	-0.02	0.08	-0.05	0.09	-0.09	-0.06	-0.07	-0.03	-0.02	0.59***	0.01	-0.02	0.04
p__Proteobacteria__f__Enterobacteriaceae_797229	-0.23	0.28	-0.17	-0.21	-0.31	-0.02	0.14	0.13	0.33	-0.52**	-0.19	0.12	0.04	-0.01	-0.07	-0.08	0.13	0.05	-0.13	-0.12	-0.26	-0.22	0.36	-0.12	0	-0.13	0.05	-0.19	-0.03	0.19	-0.26	0	-0.18	-0.17	-0.27	0.03	-0.29	-0.19	0.66***	0.17	-0.08	-0.16	0.03	0.1	0.05	0	0.1	0.11	-0.39
p__Proteobacteria__f__Enterobacteriaceae_782953	-0.2	0.36	-0.21	-0.24	-0.26	-0.12	0.15	0.14	0.35	-0.55***	-0.23	0.1	0.11	0.01	-0.11	-0.12	0.17	0.05	-0.15	-0.16	-0.3	-0.24	0.32	-0.07	0.02	-0.11	0.04	-0.2	-0.05	0.2	-0.23	-0.04	-0.15	-0.15	-0.31	0	-0.27	-0.2	0.68***	0.2	-0.07	-0.21	0.02	0.13	0.07	-0.11	0.15	0.1	-0.41*
p__Proteobacteria__f__Enterobacteriaceae_754778	0.23	0	0.01	-0.31	-0.16	0.25	-0.09	0.15	-0.08	0.13	0.3	-0.12	-0.09	0.23	0.07	-0.05	-0.11	-0.1	0.09	0.13	0.2	0.22	-0.12	0.04	0.04	-0.13	-0.04	0.06	0.14	-0.04	0.35	-0.06	-0.09	-0.08	-0.19	-0.07	-0.07	-0.08	-0.17	0.59***	-0.04	-0.08	-0.14	-0.06	-0.07	0.07	0.56***	0.29	0.09
p__Proteobacteria__f__Enterobacteriaceae_746679	-0.02	0.12	0.01	-0.17	0.09	0.1	-0.09	-0.17	-0.04	0.08	0.55***	0.2	0.02	0.33	0.1	-0.2	-0.14	-0.12	0.04	0.14	0.05	0.15	-0.06	0.1	-0.24	-0.07	0.12	0.26	-0.08	-0.08	0.37	-0.12	-0.19	-0.17	0.05	0.03	-0.14	-0.03	0	0.18	0.13	-0.17	0.1	0.11	-0.14	0.44*	0.07	0.07	-0.14
p__Proteobacteria__f__Enterobacteriaceae_676211	-0.1	0.2	0.15	-0.02	-0.04	-0.13	0.28	-0.02	-0.03	0.16	0.03	0.02	-0.18	0.01	0.01	0.11	0.16	-0.19	-0.03	0.22	0.26	0.09	-0.21	-0.01	0.06	0.12	0.07	0.04	-0.04	-0.08	0.01	0.12	-0.17	-0.03	-0.04	-0.13	-0.13	-0.03	-0.19	0.08	-0.08	0.34	0.02	-0.06	0.01	-0.17	0	-0.06	-0.15
p__Proteobacteria__f__Enterobacteriaceae_668514	0.26	-0.09	-0.17	-0.31	-0.14	0.35	-0.07	-0.06	-0.06	0.1	0.32	-0.18	-0.07	0.33	0.02	-0.14	-0.08	-0.08	0.04	0.17	0.19	0.12	-0.06	0.07	0.01	-0.27	-0.02	0.01	0.29	-0.03	0.08	-0.04	-0.07	-0.06	-0.01	-0.05	-0.05	-0.06	-0.13	0.37	-0.03	-0.06	-0.17	0.01	-0.05	-0.12	0.34	0.27	0.03
p__Proteobacteria__f__Enterobacteriaceae_588216	-0.23	0.37	-0.15	-0.2	-0.32	-0.14	0.35	0.16	0.26	-0.40*	-0.32	0.06	0.01	-0.15	-0.12	0.17	0.18	-0.09	-0.11	-0.22	-0.24	-0.32	0.2	-0.07	0.11	-0.03	0.01	-0.28	-0.06	0.17	-0.3	0.02	-0.21	-0.15	-0.16	-0.08	-0.27	-0.19	0.52**	0.01	-0.1	-0.01	0.1	0.12	0.02	-0.37	0.09	0.11	-0.23
p__Proteobacteria__f__Enterobacteriaceae_581782	-0.16	0.21	-0.26	-0.19	-0.15	-0.12	-0.04	0.08	0.41*	-0.61***	-0.21	0.05	0.2	0.03	-0.18	-0.18	0.15	0.15	-0.2	-0.2	-0.31	-0.23	0.39	-0.12	-0.07	-0.2	-0.01	-0.23	-0.03	0.23	-0.1	-0.06	-0.12	-0.09	-0.34	-0.12	-0.2	-0.08	0.68***	0.23	-0.11	-0.23	0	0.04	0.15	0.03	0.06	-0.02	-0.29
p__Proteobacteria__f__Enterobacteriaceae_581021	-0.01	-0.01	0.17	0.01	0.11	0.17	-0.23	-0.08	-0.1	0.11	0.48**	0.16	-0.01	0.28	-0.05	-0.15	0	-0.03	0.11	0.31	0.12	0.26	-0.09	0.02	-0.27	0.17	0.15	0.29	-0.15	-0.21	0.34	-0.07	-0.21	-0.07	-0.16	0.12	-0.11	0.02	-0.17	0.09	-0.01	0.18	0	0	0.06	0.65***	0.04	-0.09	0.07
p__Proteobacteria__f__Enterobacteriaceae_566243	-0.29	0.22	-0.08	-0.09	0.03	-0.15	-0.09	0.09	0.16	-0.45*	0.02	0.16	0.16	-0.05	-0.01	-0.13	0.11	0	-0.09	-0.16	-0.26	-0.28	0.22	-0.02	-0.05	0.02	0.06	0.04	-0.22	-0.09	-0.21	-0.12	0.01	-0.05	-0.28	0.14	-0.01	-0.17	0.53***	0.09	-0.09	-0.17	-0.05	0.11	-0.03	0.3	0	-0.09	-0.19
p__Proteobacteria__f__Enterobacteriaceae_559204	0.08	-0.23	0.09	0.02	0.2	0.01	-0.07	-0.16	-0.16	0.16	0.26	0.16	0.11	0.19	-0.09	-0.15	-0.12	0.16	-0.02	0.17	0.21	0.15	-0.03	0.02	-0.19	-0.06	-0.07	0.3	0.07	-0.08	0.42*	-0.11	0.07	-0.01	-0.19	0.17	0.04	-0.01	-0.19	0.26	-0.08	-0.16	-0.06	0.02	0.17	0.31	0.12	-0.12	0.08
p__Proteobacteria__f__Enterobacteriaceae_538000	0.12	-0.09	0.04	-0.17	-0.05	0.14	0.08	-0.1	-0.1	0.16	0.18	-0.17	0.26	0.14	0.11	-0.21	-0.13	-0.12	0.18	0.02	0.05	-0.01	0.09	0.02	-0.2	-0.21	-0.12	0.01	0.14	-0.05	0.25	-0.07	-0.11	-0.1	-0.11	-0.08	-0.08	-0.1	-0.12	0.14	-0.05	-0.1	0.12	0.28	-0.08	0.01	0.31	0.02	-0.07
p__Proteobacteria__f__Enterobacteriaceae_528421	0.06	-0.33	0.26	0.22	0.18	-0.11	0.11	-0.16	-0.16	0.24	0.01	0.11	-0.06	0	0.05	-0.08	0.02	0.07	0	0.05	0.11	0.12	-0.18	-0.11	-0.04	0.1	0.08	0.21	0.1	-0.08	0.29	0.05	0.08	0.01	-0.04	0	0.05	0.18	-0.32	0.01	-0.08	-0.16	0.01	-0.13	0.05	0.22	-0.04	-0.17	0.19
p__Proteobacteria__f__Enterobacteriaceae_518002	0.04	0.08	-0.12	-0.22	-0.1	0.24	-0.17	0	0.04	-0.11	0.29	0.08	0.34	0.21	0.04	-0.32	-0.2	0.06	0.12	0.12	-0.04	0	0.29	0.11	-0.32	-0.14	0.14	0.14	0.04	-0.07	0.13	-0.1	-0.04	-0.15	-0.27	0.24	-0.13	-0.15	0.15	0.13	-0.07	-0.15	0.07	0.24	0.04	0.42*	0.12	-0.06	-0.25
p__Proteobacteria__f__Enterobacteriaceae_4461030	-0.2	-0.03	-0.02	0.01	0.07	-0.11	-0.17	0.02	0.17	-0.17	0.12	0.25	-0.17	0.09	0.03	0.02	-0.2	0.19	0.06	0.26	0.22	0.12	0.13	-0.01	-0.26	0	0.37	0.33	-0.1	-0.07	-0.05	0.11	0.09	0.02	-0.03	0.09	0.06	0.02	0.23	0.05	-0.07	-0.01	0.02	-0.02	0.2	0.62***	-0.04	-0.1	0.01
p__Proteobacteria__f__Enterobacteriaceae_4333897	-0.17	0.1	-0.36	-0.22	0	-0.07	-0.11	-0.1	0.31	-0.52**	-0.11	-0.09	0.14	0.18	-0.18	-0.2	0.18	0.02	-0.09	-0.12	-0.27	-0.11	0.39	-0.08	-0.12	-0.09	0.09	-0.12	-0.02	0.2	-0.14	-0.03	-0.14	-0.11	-0.14	0	-0.21	0.02	0.66***	0.11	0.02	-0.24	0.02	0.09	0.12	0.06	0.12	-0.02	-0.33
p__Proteobacteria__f__Enterobacteriaceae_4111715	-0.23	0.28	-0.19	-0.22	-0.23	-0.11	0.06	0.12	0.40*	-0.64***	-0.16	0.16	0.05	-0.19	-0.07	-0.02	0.23	0.06	-0.28	-0.15	-0.24	-0.22	0.31	-0.13	-0.1	-0.09	-0.04	-0.08	-0.06	0.25	-0.28	-0.06	-0.05	-0.08	-0.28	-0.11	-0.19	-0.08	0.70***	0.12	-0.11	-0.23	0.09	0.01	0.14	0.03	-0.03	0	-0.25
p__Proteobacteria__f__Enterobacteriaceae_3829957	-0.23	0.38	-0.1	0.04	-0.16	-0.08	0.3	-0.03	0.1	-0.16	-0.25	0.05	0.06	-0.06	-0.13	-0.05	0.22	0.03	0.07	0.06	0.12	0.11	0.13	-0.06	-0.02	-0.14	-0.08	-0.18	-0.01	0.15	-0.33	0.17	-0.2	-0.18	-0.06	0.15	-0.21	-0.21	0.40*	0.05	0.1	-0.07	0.18	0.22	-0.1	-0.24	0.13	0.22	-0.43*
p__Proteobacteria__f__Enterobacteriaceae_368849	0.12	-0.08	-0.11	-0.09	-0.02	0.15	-0.12	-0.11	0.07	-0.08	0.15	-0.12	-0.12	0.25	-0.01	-0.13	-0.14	0.18	-0.08	0.02	0.05	0.08	-0.08	0.05	0.04	-0.09	-0.05	-0.01	0.08	-0.05	0.2	-0.07	0.04	-0.11	-0.03	-0.09	-0.09	-0.11	-0.04	0.56***	-0.05	-0.11	-0.21	-0.13	0.11	0.08	0.27	0.18	0
p__Proteobacteria__f__Enterobacteriaceae_366451	0.03	-0.23	0.02	0	0.1	0.12	-0.17	-0.15	-0.03	0.15	0.23	0.08	0.39	0.24	-0.02	-0.15	-0.2	-0.19	-0.01	-0.04	-0.1	-0.06	0.1	0.16	-0.05	0.02	0.03	0.13	0	-0.07	0.66***	-0.1	-0.17	-0.15	-0.2	0.04	-0.13	-0.15	-0.17	-0.03	-0.07	-0.15	0.13	0.08	-0.13	0.35	-0.12	-0.32	-0.09
p__Proteobacteria__f__Enterobacteriaceae_3531225	-0.22	0.31	-0.1	-0.11	-0.25	-0.11	0.23	0.05	0.31	-0.42*	-0.17	0.2	0.03	-0.04	-0.14	-0.01	0.26	-0.03	-0.14	-0.03	-0.14	-0.1	0.26	-0.23	0	-0.03	0.01	-0.1	-0.13	0.21	-0.19	0.05	-0.14	-0.1	-0.28	0.09	-0.22	-0.09	0.62***	0.09	0.03	-0.17	0.1	0.11	0.08	-0.12	0.17	0.14	-0.27
p__Proteobacteria__f__Enterobacteriaceae_345362	-0.21	0.25	-0.13	-0.22	-0.24	-0.16	0.15	0.19	0.32	-0.52**	-0.29	0.07	0.15	-0.07	-0.05	-0.19	0.17	0.11	-0.22	-0.25	-0.36	-0.24	0.36	-0.14	0.02	-0.1	-0.11	-0.24	-0.08	0.2	-0.24	-0.06	-0.13	-0.13	-0.25	0.02	-0.26	-0.12	0.68***	0.12	-0.01	-0.31	0.17	0.16	0.12	-0.06	0.13	0.12	-0.29
p__Proteobacteria__f__Enterobacteriaceae_331697	0.19	-0.19	0.07	0	0.01	0.21	-0.04	-0.19	-0.08	0.27	0.35	0.03	0.22	0.07	-0.09	-0.05	-0.04	-0.03	-0.05	0.09	0.13	0.09	-0.37	-0.1	0	0.08	0.05	0.29	0.01	-0.15	0.46**	-0.08	-0.01	-0.05	0.05	0.01	-0.06	0.06	-0.28	0.14	-0.06	0.12	0.19	0.09	0.04	0.19	-0.03	-0.16	0.26
p__Proteobacteria__f__Enterobacteriaceae_304641	-0.02	0.28	-0.26	-0.24	-0.12	-0.11	-0.13	0.23	0.28	-0.43*	-0.19	0.05	0.23	-0.03	-0.3	-0.19	0.24	0.29	-0.18	-0.21	-0.31	-0.14	0.15	-0.06	-0.02	-0.05	0.07	-0.15	0.08	0.23	-0.03	0.03	-0.07	-0.07	-0.2	0.1	-0.17	-0.07	0.41*	0.2	-0.09	-0.19	0.06	0.13	0.16	0.01	0.11	0.02	-0.28
p__Proteobacteria__f__Enterobacteriaceae_301149	-0.25	0.36	-0.36	-0.34	-0.03	-0.21	-0.08	0.04	0.40*	-0.63***	-0.03	0.17	0.12	-0.13	-0.07	-0.01	0.14	0.02	-0.36	-0.17	-0.33	-0.3	0.2	-0.23	0.14	0.15	-0.05	-0.08	-0.25	0.14	-0.13	-0.01	-0.14	-0.1	-0.12	0.05	-0.17	-0.09	0.72***	0.09	0.09	-0.2	0.11	0.18	0.06	0.08	-0.06	0.06	-0.31
p__Proteobacteria__f__Enterobacteriaceae_299267	-0.26	0.32	-0.14	-0.27	-0.29	0.08	0.04	0.11	0.29	-0.46**	0.06	0.2	0.12	0	-0.01	-0.08	0	0.03	0.01	0.08	-0.15	-0.07	0.33	-0.02	-0.12	-0.13	0.17	-0.03	-0.07	0.12	-0.17	-0.02	-0.25	-0.27	-0.37	0.1	-0.33	-0.26	0.55***	0.23	-0.1	-0.05	0	0.16	-0.02	0.25	0.11	0.09	-0.42*
p__Proteobacteria__f__Enterobacteriaceae_295053	-0.3	0.04	-0.04	-0.04	-0.17	-0.13	0.18	-0.02	0.31	-0.37	-0.27	0.06	0.11	0.05	-0.09	-0.19	0.29	-0.07	-0.08	0	-0.12	-0.13	0.22	-0.2	-0.08	-0.19	-0.03	0.05	-0.08	0.25	-0.18	0.03	-0.19	-0.03	-0.21	-0.03	-0.14	-0.03	0.64***	0.03	-0.08	-0.17	0.07	0.1	0.01	-0.04	0.12	0.07	-0.2
p__Proteobacteria__f__Enterobacteriaceae_2689396	-0.22	0.29	-0.16	-0.17	-0.17	-0.23	0.12	0.15	0.35	-0.57***	-0.26	0.14	0.14	-0.05	-0.21	0	0.26	-0.03	-0.19	-0.13	-0.29	-0.21	0.32	-0.1	-0.07	0.01	0.03	-0.14	-0.08	0.22	-0.25	0.01	-0.13	-0.13	-0.37	0.02	-0.26	-0.13	0.70***	0.05	-0.15	-0.13	0.03	0.07	0.12	-0.11	0.01	-0.06	-0.37
p__Proteobacteria__f__Enterobacteriaceae_231787	-0.24	0.04	-0.09	-0.15	0.01	0.04	0.02	0.03	-0.13	-0.28	-0.05	-0.1	0.19	0	-0.11	0.04	-0.04	-0.03	0.01	-0.16	-0.15	-0.08	0.2	-0.12	0.12	-0.15	-0.1	0.03	0.03	-0.06	-0.12	-0.09	-0.01	-0.13	-0.3	-0.11	-0.11	-0.13	0.47**	0.11	-0.06	-0.13	-0.04	0.17	0.07	-0.01	0	-0.09	-0.11
p__Proteobacteria__f__Enterobacteriaceae_228556	0.13	-0.13	-0.2	-0.21	0.05	0.26	-0.16	-0.14	-0.14	0.11	0.41*	0.1	0.3	0.35	-0.09	-0.21	-0.06	-0.18	0	-0.02	-0.1	-0.11	0.02	0.11	0.02	-0.02	0.08	0.15	0.07	-0.07	0.57***	-0.1	-0.16	-0.14	-0.16	0.04	-0.12	0.02	-0.18	0.11	-0.07	0.03	-0.02	0.17	-0.12	0.13	-0.01	-0.24	0.06
p__Proteobacteria__f__Enterobacteriaceae_197286	-0.19	-0.08	0.34	0.11	0.17	0.06	-0.13	-0.05	-0.19	0.11	0.41*	0.12	-0.04	0.09	0.19	-0.04	-0.26	-0.01	0.18	0.13	0.08	0.22	-0.1	0.01	-0.16	0.21	0.26	0.40*	-0.23	-0.09	0.14	-0.13	-0.09	-0.05	-0.03	0.15	-0.01	0.1	-0.16	-0.1	-0.09	0.08	0.01	0.03	-0.01	0.70***	-0.03	-0.06	0.25
p__Proteobacteria__f__Enterobacteriaceae_173654	-0.25	0.19	-0.2	-0.11	0.12	-0.14	0.09	-0.16	0.02	-0.44*	-0.09	-0.16	0.35	-0.16	-0.09	-0.15	0.14	0.07	-0.24	-0.24	-0.28	-0.29	0.07	-0.06	0.07	-0.06	-0.04	0.03	-0.05	0.27	-0.01	-0.11	0.21	-0.01	-0.24	-0.13	0.03	-0.16	0.45*	-0.14	-0.08	-0.16	0.06	0.12	0.02	-0.14	-0.24	-0.32	-0.26
p__Proteobacteria__f__Enterobacteriaceae_1111294	-0.27	0.29	-0.2	-0.23	-0.21	-0.12	0.15	0.09	0.3	-0.54***	-0.2	0.06	0.16	-0.02	-0.06	-0.17	0.13	0.06	-0.2	-0.18	-0.31	-0.24	0.3	-0.18	0.13	-0.14	0.04	-0.15	-0.12	0.22	-0.2	-0.01	-0.1	-0.12	-0.29	-0.03	-0.24	-0.11	0.65***	0.16	-0.08	-0.19	0.11	0.18	0.1	-0.03	0.13	0.02	-0.35
p__Fusobacteria__g__Fusobacterium_572889	0.01	0.03	0.06	-0.12	-0.28	0.18	0.07	0.31	-0.1	0.02	-0.15	-0.08	-0.11	-0.16	0.13	0.03	0.01	0.04	0.09	-0.09	0	-0.04	0.2	0.02	-0.09	-0.09	-0.31	-0.23	0.15	-0.05	-0.16	-0.07	0.06	0.08	-0.01	-0.08	-0.08	0.08	-0.02	0.01	-0.05	-0.1	0.13	0.07	0.34	-0.17	0.16	0.3	0.04
p__Fusobacteria__g__Fusobacterium_444857	0.26	0.19	-0.2	-0.28	-0.03	0.16	-0.12	0.07	-0.11	0.17	0.26	0.08	0.42*	-0.17	-0.01	-0.12	0.13	-0.13	0.12	-0.07	-0.05	-0.05	-0.01	0.03	0.15	0.06	-0.22	-0.03	0.08	-0.05	0.08	0.45*	-0.12	0.06	-0.03	0.31	-0.09	0.07	-0.04	0	-0.05	0.09	0.49**	0.54***	0.11	-0.03	0.11	0.01	-0.12
p__Fusobacteria__g__Fusobacterium_4439398	-0.08	-0.09	0.23	-0.01	-0.15	0.14	-0.07	0.23	-0.06	0.1	0	-0.03	-0.07	-0.1	0.03	0.04	0.15	-0.08	0.01	0.17	0.1	0.12	0.07	-0.2	-0.02	0.15	-0.16	-0.01	-0.08	-0.03	-0.1	-0.04	-0.07	0.22	0	-0.05	-0.05	0.23	0.01	-0.1	-0.03	0.24	0.13	-0.01	0.27	0.06	-0.1	0.19	0.06
p__Fusobacteria__g__Fusobacterium_3073894	0.11	0.09	-0.13	0.08	0.14	-0.07	-0.06	-0.05	-0.05	0.08	-0.13	-0.15	-0.06	-0.08	-0.12	-0.11	0.51**	-0.06	0.08	0.05	0.05	0.16	-0.22	-0.23	0.07	0.18	-0.23	-0.25	-0.09	-0.02	-0.08	0.46**	-0.06	-0.05	0.11	0.36	-0.04	-0.05	-0.1	-0.08	-0.02	0.33	0.06	0.04	-0.04	-0.21	0.14	0.03	-0.11
p__Fusobacteria__g__Fusobacterium_1139769	-0.14	0.22	0.1	-0.05	0.07	-0.18	0.16	0.05	-0.12	0.19	0.18	0.19	0.2	0.21	0	-0.16	-0.05	-0.15	0.19	-0.01	0.13	0.07	-0.1	0.02	0.08	0.11	-0.2	-0.06	-0.27	-0.06	0.08	0.40*	-0.14	-0.12	0	0.27	-0.1	-0.12	-0.04	-0.05	-0.06	0.06	0.21	0.41*	-0.1	-0.02	0.33	0.24	-0.15
p__Firmicutes__o__Clostridiales_564806	-0.12	-0.09	0.03	-0.17	0.17	-0.09	-0.07	-0.06	-0.06	-0.33	0.16	-0.03	-0.07	-0.1	0.03	0.04	-0.08	0.18	-0.21	-0.03	-0.09	-0.07	0.01	0.02	-0.09	0.09	-0.17	-0.17	0.1	-0.03	-0.1	-0.04	0.22	0.26	0.01	-0.05	0.31	0.26	0.05	-0.1	-0.03	-0.06	-0.17	-0.14	0.31	0.18	-0.1	-0.23	0.04
p__Firmicutes__o__Clostridiales_509416	0.06	-0.05	-0.02	-0.04	0.12	-0.23	0.09	0.02	-0.03	0.16	0.11	0.1	-0.05	-0.24	0.21	0	0.22	-0.19	0.23	0.01	0.1	0.02	-0.06	-0.06	0.03	-0.1	0.04	-0.04	-0.18	-0.08	-0.17	0.32	0.08	0.29	0.45*	0.35	0.18	0.34	-0.08	-0.15	-0.08	0.02	0.46*	0.35	0.06	0.05	-0.06	-0.07	-0.01
p__Firmicutes__o__Clostridiales_369429	0.05	0.09	0.11	-0.01	-0.02	-0.18	0.01	0.22	0.04	0.08	0.07	0.28	0.04	-0.19	0.22	0.03	-0.03	-0.15	0.21	-0.08	0.03	-0.01	-0.01	-0.03	0.15	-0.07	-0.14	-0.09	-0.23	-0.06	-0.2	0.21	0.04	0.24	0.2	0.3	0.11	0.23	0	-0.07	-0.06	0.07	0.35	0.34	0.09	0.08	-0.07	0	-0.15
p__Firmicutes__o__Clostridiales_191043	0.06	0.15	-0.28	-0.17	0.23	-0.12	-0.09	-0.08	-0.08	0.13	0.03	0	0.33	-0.13	-0.19	-0.03	0.08	0.09	-0.09	-0.1	-0.15	-0.02	-0.11	0.11	0.13	0.29	-0.06	0.03	0.06	-0.04	0.03	0.28	-0.09	-0.08	0.29	0.46**	-0.07	-0.08	-0.17	-0.13	0.42*	-0.08	0.29	0.23	-0.07	-0.09	0.02	0.13	-0.07
p__Firmicutes__g__Veillonella__s__parvula_518743	-0.05	-0.01	-0.05	0.02	0.09	-0.12	-0.09	0.18	-0.08	-0.2	-0.22	0.01	-0.09	-0.13	-0.05	-0.04	0.06	0.31	-0.09	-0.15	-0.11	-0.14	0.13	-0.05	-0.01	0.09	-0.19	-0.11	0.08	-0.04	-0.14	-0.06	0.36	0.17	-0.07	-0.07	0.22	0.17	0.1	0.19	-0.04	-0.08	-0.14	-0.18	0.50**	-0.08	0.04	-0.07	0.21
p__Firmicutes__g__Veillonella__s__parvula_4391625	-0.05	-0.03	0.11	0.08	0.2	-0.17	0.06	-0.11	-0.11	0.04	-0.11	0.04	0.36	-0.18	-0.05	-0.03	0.14	-0.14	-0.15	-0.13	-0.26	-0.17	-0.19	-0.07	0.06	0.13	-0.08	0.12	0.04	-0.06	0.17	0.15	0.04	-0.11	-0.08	0.09	-0.1	-0.11	0.01	-0.18	-0.06	-0.11	0.3	0.16	-0.1	-0.05	-0.08	-0.09	-0.01
p__Firmicutes__g__Veillonella__s__parvula_3889756	-0.25	-0.02	0.04	-0.08	-0.09	-0.09	0.18	-0.03	0.12	-0.36	-0.13	0.15	0.31	-0.3	-0.02	0.02	0.06	0	-0.32	-0.3	-0.32	-0.28	0.15	-0.04	0.07	0.07	-0.04	0.03	-0.09	0.27	0.08	-0.13	-0.04	-0.19	-0.32	-0.01	-0.16	-0.19	0.19	-0.03	-0.09	-0.19	0.03	-0.03	-0.05	0.01	-0.1	-0.28	-0.03
p__Firmicutes__g__Veillonella__s__parvula_3801267	0.16	-0.01	0	-0.05	-0.04	0.06	-0.09	0.18	-0.08	-0.03	-0.08	0.01	-0.09	-0.13	0.22	-0.04	0.06	-0.1	0.06	-0.2	-0.13	-0.12	0.18	0.11	0.06	-0.01	-0.29	-0.12	0.1	-0.04	0	-0.06	-0.09	-0.08	-0.19	-0.07	-0.07	-0.08	-0.02	0.38	-0.04	-0.08	-0.14	-0.06	-0.07	-0.11	0.23	0.19	0.22
p__Firmicutes__g__Veillonella__s__dispar_962249	-0.23	0.01	-0.05	0.01	0.19	-0.31	0.12	-0.17	0.09	-0.24	-0.01	0.14	0.31	-0.2	-0.29	0.05	0.18	0.12	-0.40*	-0.1	-0.06	-0.2	-0.13	-0.16	-0.07	0.12	-0.06	0.14	-0.12	0.21	0.19	-0.06	0.04	-0.02	-0.18	-0.03	-0.06	-0.02	0.25	-0.11	-0.12	-0.01	0.17	0.03	0.22	-0.06	-0.26	-0.34	0.09
p__Firmicutes__g__Veillonella__s__dispar_4401373	0.08	-0.50**	0.2	0.15	0.27	-0.14	-0.11	-0.1	-0.1	0.16	0.17	0.25	-0.11	-0.02	0.01	0.16	-0.13	0.03	0.03	0.09	0.14	0.14	0.04	-0.25	-0.21	0.03	-0.01	0.26	-0.16	-0.05	0.1	-0.07	0.06	0.1	-0.02	-0.08	0.14	0.3	-0.07	-0.15	-0.05	-0.1	0.09	0.02	0.14	0.40*	-0.15	-0.13	0.46*
p__Firmicutes__g__Veillonella__s__dispar_4316391	-0.05	-0.02	-0.05	0.21	0.05	0.06	-0.14	-0.12	0.08	-0.08	-0.15	-0.07	0.29	-0.07	-0.18	-0.05	0.13	0.02	0.01	-0.08	-0.03	0	0.08	-0.2	-0.17	-0.05	-0.26	0.04	-0.06	0.34	0.1	-0.08	-0.14	-0.12	-0.19	-0.1	-0.1	-0.12	0.31	-0.08	-0.06	0.08	0.06	0.04	-0.1	-0.08	-0.19	-0.1	-0.04
p__Firmicutes__g__Veillonella__s__dispar_4310208	-0.11	-0.01	-0.15	-0.08	-0.03	-0.12	-0.09	0.14	0.18	-0.40*	-0.22	0.13	-0.09	-0.13	0.06	-0.18	0.08	0.32	-0.29	-0.25	-0.35	-0.25	0.29	-0.08	0.11	0.05	-0.07	0.04	-0.19	0.46**	0	-0.06	0.13	-0.08	-0.19	-0.07	-0.07	-0.08	0.29	0.17	-0.04	-0.08	-0.23	-0.18	0.22	-0.04	0.02	-0.02	0.07
p__Firmicutes__g__Veillonella__s__dispar_4296244	0.17	0.06	0.18	-0.03	0.06	-0.1	-0.01	0.13	-0.11	0.05	0.1	0.18	-0.08	0	0.07	-0.16	0.03	0.17	0.05	0.03	0.03	0.16	-0.1	-0.19	0.01	-0.13	-0.19	0.21	-0.13	0.19	0.11	0.05	0.14	0.1	-0.06	0.09	0.04	0.05	0.11	0.12	0.09	-0.23	0.13	0.05	0.21	0.05	0.19	0.27	0.09
p__Firmicutes__g__Veillonella__s__dispar_342427	-0.02	-0.12	0.28	0.07	-0.05	-0.13	0.25	-0.03	0.02	0	-0.1	0.25	0.36	-0.24	-0.06	0.04	-0.07	0.07	-0.19	-0.03	-0.12	-0.08	-0.05	0	-0.03	0.07	-0.03	0.17	0.05	0.27	0.13	-0.11	0.08	-0.01	-0.22	0.02	0.03	-0.01	-0.03	-0.16	-0.08	-0.16	0.12	0.05	0.03	-0.03	-0.16	-0.28	0.03
p__Firmicutes__g__Veillonella_4440670	0.16	0.15	-0.01	0.11	0.1	0.06	-0.09	-0.08	-0.08	0.13	0.17	0	-0.09	-0.13	-0.06	0.26	0.06	-0.1	0.21	-0.05	0.04	-0.11	-0.32	0.06	0.27	0.21	0.1	0.03	-0.22	-0.04	0.03	0.27	0.1	0.14	0.03	-0.07	0.18	-0.08	-0.17	-0.13	-0.04	0.64***	0.03	-0.05	-0.07	-0.08	-0.13	-0.14	0.27
p__Firmicutes__g__Veillonella_368099	-0.14	0.06	-0.07	-0.22	0.1	-0.05	-0.04	-0.04	-0.04	-0.31	0.18	-0.1	-0.04	-0.06	-0.08	0.22	-0.05	-0.04	-0.11	-0.01	-0.09	-0.06	0.06	0.15	0.07	-0.09	-0.19	-0.2	0.05	-0.02	-0.06	-0.02	-0.04	-0.04	-0.08	-0.03	-0.03	-0.04	0.25	-0.06	-0.02	-0.04	-0.1	-0.08	-0.03	-0.05	-0.06	-0.13	-0.08
p__Firmicutes__g__Veillonella_1023075	0.12	-0.09	0.13	0.11	-0.06	0.02	0.1	-0.1	0.09	0.02	-0.04	0.12	-0.11	0.14	0.13	-0.11	-0.13	0.04	-0.12	-0.11	-0.04	-0.02	-0.18	-0.14	0.12	0.03	-0.2	-0.02	-0.12	-0.05	0.1	-0.07	0.25	0.11	0.12	-0.08	0.15	0.11	0.03	0.16	-0.05	-0.1	0.13	-0.1	0.15	0.14	0.17	0.12	0.18
p__Firmicutes__g__Streptococcus__s__luteciae_303161	-0.08	0.06	-0.16	-0.15	0.1	-0.05	-0.04	-0.04	-0.04	0.06	0.18	0.16	0.43*	-0.06	-0.08	-0.08	-0.05	-0.04	-0.2	0.03	-0.06	-0.19	0.09	0.03	-0.05	0.02	0.06	0.07	0.02	-0.02	0.31	-0.02	-0.04	-0.04	-0.08	-0.03	-0.03	-0.04	-0.07	-0.06	-0.02	-0.04	0.2	0.27	-0.03	0.05	-0.06	-0.13	-0.08
p__Firmicutes__g__Streptococcus_967427	0.25	-0.21	-0.03	-0.13	0.05	-0.09	-0.12	0.17	-0.03	0.19	0.05	0.04	-0.02	0.02	0.11	-0.23	-0.05	0.21	0	0.2	0.1	0.21	0.11	-0.04	-0.1	-0.27	-0.05	0.01	0.17	0.06	0.06	0.03	0.02	0.09	0.15	0.03	-0.01	0.25	-0.11	0.17	0	-0.26	0.12	0.06	0.2	-0.03	0.01	0.23	0.14
p__Firmicutes__g__Streptococcus_593803	0.31	0.07	-0.06	-0.11	0.01	0.02	-0.08	0.19	-0.16	0.26	0.11	0	0.02	0.01	0.09	-0.2	0.01	0.11	0.07	0.02	0.07	0.17	-0.09	-0.08	0.19	-0.13	-0.05	-0.06	0.04	-0.12	0.16	0.13	-0.06	0	0.07	0.04	-0.12	0.16	-0.22	0.15	0.13	0.03	0.12	0.15	0.09	-0.13	0.09	0.24	0.15
p__Firmicutes__g__Streptococcus_579608	-0.07	0.22	-0.18	-0.29	-0.16	-0.06	0.06	0.12	0.19	-0.31	-0.09	0.13	0.16	0.04	-0.04	-0.08	-0.03	0.02	-0.15	-0.03	-0.16	-0.08	0.15	-0.05	0.02	-0.07	0.1	-0.09	-0.08	-0.08	0.05	0.04	-0.05	-0.17	-0.04	-0.02	-0.14	-0.17	0.37	0.09	-0.08	-0.17	0.13	0.08	0.03	0.11	0	-0.04	-0.14
p__Firmicutes__g__Streptococcus_561636	-0.19	0.06	0.06	0.03	-0.17	-0.12	0.25	-0.06	0.27	-0.35	-0.22	0.25	0	-0.1	-0.07	-0.11	0.21	0.17	-0.19	0.04	-0.05	-0.09	0.06	-0.21	-0.01	0.01	-0.21	-0.03	-0.06	-0.09	-0.15	-0.12	0.11	0.12	-0.14	-0.15	0.05	0.12	0.50**	0.27	-0.09	-0.17	-0.07	-0.01	0.37	0.03	-0.04	-0.08	-0.21
p__Firmicutes__g__Streptococcus_522025	-0.12	0.09	-0.07	-0.06	-0.18	-0.01	0.22	-0.11	0.23	-0.21	0	0.22	0.02	0.08	0.06	-0.04	-0.15	0.03	-0.05	0.11	0.03	-0.09	0.28	-0.06	-0.1	-0.08	0.01	0.02	-0.13	-0.06	-0.08	-0.08	0.06	-0.11	-0.15	-0.1	-0.1	-0.11	0.31	0.11	-0.06	-0.11	-0.08	0.07	0.14	0.05	-0.02	-0.08	-0.24
p__Firmicutes__g__Streptococcus_516966	0.2	0.03	0.1	-0.01	-0.04	0.03	-0.04	0.01	0.07	0.04	0.22	0.25	0.13	0.16	0.05	0.01	-0.18	-0.19	0.24	0.08	0.01	0.14	0.13	0.04	-0.21	-0.08	-0.04	0.02	-0.14	-0.14	0.17	-0.13	-0.24	-0.23	-0.23	-0.04	-0.25	-0.12	0.12	0.19	-0.14	-0.11	-0.03	0.14	-0.07	0.21	0.05	0.07	-0.1
p__Firmicutes__g__Streptococcus_516611	-0.09	0.02	0.04	0.05	-0.16	-0.03	0.18	-0.12	0.27	-0.2	-0.11	0.2	0.01	0.05	0.12	-0.05	-0.16	-0.01	-0.02	0.05	-0.07	-0.08	0.21	-0.09	-0.06	-0.01	-0.02	0.04	-0.19	-0.06	0	-0.08	0.02	-0.12	-0.14	-0.1	-0.1	-0.12	0.29	0.12	-0.06	-0.12	-0.07	0.04	0.1	0.11	-0.03	-0.06	-0.17
p__Firmicutes__g__Streptococcus_349024	-0.03	0.15	0.05	-0.12	-0.03	-0.12	0.13	0.15	-0.08	0.13	0.05	0.26	0.14	0.04	-0.19	-0.18	0.44*	-0.1	-0.05	0.19	0.1	0.11	-0.02	-0.14	-0.12	0.02	-0.05	0.05	-0.06	-0.04	0.04	0.25	-0.09	0.14	0.05	0.18	-0.07	0.15	0.11	-0.13	-0.04	-0.08	0.43*	0.18	0.19	0.03	0.01	0.08	-0.17
p__Firmicutes__g__Streptococcus_3449122	-0.23	0.14	-0.02	-0.13	-0.26	-0.22	0.33	0.12	0.31	-0.42*	-0.32	0.31	-0.17	-0.23	-0.08	-0.04	0.37	0.21	-0.42*	-0.05	-0.11	-0.16	0.07	-0.25	0.21	0.19	-0.18	-0.2	-0.09	-0.07	-0.25	0.08	0.16	0.17	0.09	0.02	0.09	0.17	0.41*	0.17	0.17	-0.15	-0.02	-0.12	0.43*	-0.11	0.04	-0.02	-0.1
p__Firmicutes__g__Streptococcus_316587	-0.06	-0.09	0.03	-0.11	-0.16	0.14	-0.07	0.24	-0.06	0.1	-0.01	0.13	0.2	-0.1	0.2	-0.14	-0.08	-0.08	-0.06	-0.01	-0.13	-0.15	0.19	0.18	0.02	-0.02	-0.09	-0.11	0.12	-0.03	0.1	-0.04	-0.07	-0.06	0	-0.05	-0.05	-0.06	-0.13	0.11	-0.03	-0.06	0.11	0.06	-0.05	0.05	0.1	0.09	0.01
p__Firmicutes__g__Streptococcus_301270	-0.07	-0.08	0.12	0.02	0.17	-0.09	-0.07	-0.06	-0.06	0.1	0.17	0.13	0.21	-0.1	0.03	-0.14	-0.08	0.17	-0.07	0.25	0.02	0.11	-0.16	-0.05	-0.17	0.05	0.06	0.25	0.01	-0.03	0.11	-0.04	0.21	0.25	0.18	-0.05	0.3	0.25	-0.13	-0.1	-0.03	-0.06	0.01	0.06	0.3	0.19	-0.1	-0.03	0.03
p__Firmicutes__g__Streptococcus_1082539	0.03	0.09	0.11	-0.07	-0.08	-0.07	0.13	0.14	-0.03	0.12	0.06	0.13	0.13	-0.15	0.06	-0.11	-0.07	0.2	0.07	0.08	0.07	0.13	-0.09	0.02	0.13	-0.07	-0.1	0	0.08	-0.09	-0.09	-0.01	-0.01	0.1	0.16	0.11	-0.01	0.25	-0.1	0.2	0.14	-0.19	0.23	0.3	0.28	0.01	0.09	0.14	0.1
p__Firmicutes__g__Streptococcus_1078207	0.12	-0.36	0.14	0.13	-0.13	0.1	0.19	-0.09	-0.01	0.23	-0.14	0.03	0.13	0	0.08	-0.03	-0.09	-0.1	0.15	-0.02	-0.01	-0.01	0.19	-0.25	-0.06	-0.05	-0.06	0.07	0.06	-0.14	0.02	0	-0.01	0.07	0.06	-0.07	-0.02	0.18	-0.02	-0.11	-0.02	-0.17	0.24	0.26	0.2	-0.04	0.05	0.01	0.16
p__Firmicutes__g__Streptococcus_1000547	0.01	0.11	-0.03	-0.09	-0.31	0.13	0.21	-0.06	0.25	-0.12	-0.01	0.14	-0.07	-0.1	0.19	0.05	-0.08	-0.08	-0.05	-0.05	0.02	-0.03	0.09	-0.01	0.12	0.01	-0.19	-0.23	-0.09	-0.03	-0.1	-0.04	-0.07	-0.06	0.08	-0.05	-0.05	-0.06	0.22	0.37	-0.03	-0.06	-0.03	0.17	-0.05	-0.05	0.13	0.11	-0.13
p__Firmicutes__g__Staphylococcus_4323284	-0.07	0.23	-0.13	-0.17	0.18	-0.06	-0.01	-0.13	-0.13	0.2	0.13	-0.02	0.71***	-0.2	-0.12	-0.09	0.05	-0.16	0.09	-0.04	-0.1	-0.06	-0.3	-0.05	0.06	0.21	0.05	0.21	-0.01	-0.06	0.15	0.33	-0.14	-0.13	0.15	0.26	-0.11	-0.13	-0.04	-0.2	-0.06	0.19	0.50**	0.56***	-0.11	-0.04	-0.11	-0.01	-0.17
p__Firmicutes__g__Staphylococcus_1084865	0.04	0.05	-0.1	-0.17	0.17	0	-0.02	-0.11	-0.2	0.24	0.27	-0.11	0.49**	-0.04	0.1	-0.14	-0.1	-0.25	0.19	-0.1	-0.06	0.02	-0.27	-0.06	0.08	0.03	0.1	0.27	-0.09	-0.1	0.28	0.23	-0.23	-0.2	0.1	0.1	-0.17	-0.07	-0.16	-0.08	-0.1	0.09	0.44*	0.55***	-0.17	-0.01	0.18	0.05	0.18
p__Firmicutes__g__Staphylococcus_1076316	0.2	0	-0.07	-0.14	0.1	0.13	-0.19	0.02	-0.18	0.34	0.27	-0.05	0.40*	0.36	0.01	-0.17	-0.18	-0.36	0.21	-0.01	-0.1	0.02	-0.11	0.09	-0.08	0.02	0.07	0.15	-0.01	-0.08	0.36	0.1	-0.27	-0.24	0.05	0	-0.3	-0.15	-0.14	-0.05	-0.1	0.1	0.3	0.36	-0.18	-0.08	0.13	0.12	-0.1
p__Firmicutes__g__Ruminococcus__s__gnavus_360015	-0.04	0.19	0	-0.12	0.1	-0.01	-0.12	0.07	-0.11	0.04	0.04	-0.12	0.62***	-0.17	-0.13	-0.23	-0.01	0.17	0.04	-0.12	-0.21	0.03	-0.13	-0.16	0.08	0.05	-0.08	0.24	-0.03	-0.05	0.07	-0.07	0.05	0.06	-0.01	0.14	-0.09	0.07	0.2	-0.17	0.29	-0.11	0.37	0.37	0.32	0.05	-0.17	0	-0.15
p__Firmicutes__g__Ruminococcus_591635	-0.14	-0.41*	0.21	0.14	-0.14	0.25	0.02	0.03	-0.12	0.19	-0.06	-0.03	0.01	0.09	0.21	-0.15	-0.05	-0.15	0.32	0.09	0.07	0.01	0.35	0.03	-0.12	-0.24	-0.08	0.04	0.12	-0.06	-0.2	0.15	-0.14	0.02	0.16	0.28	-0.1	0.03	-0.09	-0.07	-0.06	0.03	0.19	0.18	0.06	0.15	0.06	0.06	-0.14
p__Firmicutes__g__Ruminococcus_563086	0.22	0.06	-0.1	-0.2	-0.18	0.33	-0.04	-0.04	-0.04	0.06	0.18	-0.1	-0.04	0.31	-0.08	-0.08	-0.05	-0.04	0	0.05	0.07	0.12	-0.09	-0.08	0.2	-0.21	-0.03	-0.1	0.12	-0.02	0.26	-0.02	-0.04	-0.04	-0.08	-0.03	-0.03	-0.04	-0.07	0.36	-0.02	-0.04	-0.1	-0.08	-0.03	0.02	0.3	0.22	-0.08
p__Firmicutes__g__Ruminococcus_304211	0.09	0.1	0.12	-0.1	-0.08	-0.06	0.13	0.22	-0.13	0.2	-0.05	0.07	0.02	-0.2	0.19	-0.28	0.2	0.12	0.29	0	0.08	0.06	-0.02	0.02	0.13	-0.22	-0.09	-0.1	0.15	-0.06	-0.21	0.39	-0.14	0.05	0.04	0.25	-0.11	0.06	-0.17	0.06	-0.06	0.06	0.24	0.25	0.1	0.06	0.14	0.16	-0.1
p__Firmicutes__g__Roseburia_701221	0.17	0.09	0.06	0.03	-0.03	0.02	0.05	0.13	-0.16	0.13	-0.04	0	-0.18	-0.11	0.24	-0.08	0.13	-0.09	0.06	-0.05	0.06	-0.02	0.08	-0.13	0.12	-0.16	-0.16	-0.27	0.07	-0.08	-0.14	0.36	0.1	0.19	0.13	0.24	0.07	0.18	-0.07	-0.09	-0.08	0.02	0.2	0.07	0.05	-0.13	-0.02	0.1	-0.11
p__Firmicutes__g__Roseburia_508968	0.19	-0.12	0.02	0.01	0.12	-0.09	0.05	-0.02	-0.16	0.13	0.1	-0.1	-0.18	-0.11	0.39*	-0.16	0.12	-0.19	0.13	-0.15	0.1	-0.08	0.02	-0.09	0.07	-0.29	-0.07	-0.16	-0.05	-0.08	0.04	0.15	0.25	0.33	0.18	0.02	0.26	0.31	-0.19	-0.09	-0.08	0.02	0.2	0.05	0.02	-0.03	-0.02	-0.04	0.13
p__Firmicutes__g__Robinsoniella__s__peoriensis_4325509	-0.03	0.06	-0.16	-0.03	-0.18	-0.05	-0.04	-0.04	0.49**	-0.31	-0.09	0.16	-0.04	-0.06	-0.08	0.22	-0.05	-0.04	-0.22	-0.17	-0.19	-0.14	0	0.13	0.12	0.12	0.08	-0.22	-0.13	-0.02	-0.06	-0.02	-0.04	-0.04	0.28	-0.03	-0.03	-0.04	0.21	0.33	-0.02	-0.04	0.14	-0.08	-0.03	0.12	-0.06	-0.13	-0.08
p__Firmicutes__g__Pseudoramibacter_Eubacterium_191975	-0.3	0.09	-0.31	-0.1	0.14	-0.07	-0.06	-0.05	-0.05	-0.44*	-0.13	-0.15	-0.06	-0.08	-0.12	-0.11	0.22	0.25	-0.24	-0.27	-0.28	-0.27	0.18	-0.22	0.13	0.11	-0.14	-0.06	-0.22	-0.02	-0.08	-0.04	0.28	-0.05	-0.12	-0.04	-0.04	-0.05	0.32	0.15	-0.02	-0.05	-0.14	-0.11	0.39	-0.07	-0.08	-0.19	-0.11
p__Firmicutes__g__Phascolarctobacterium_556835	0.03	-0.07	0.05	0.35	0.01	0.14	0.02	-0.11	-0.11	0.18	-0.3	-0.34	-0.13	-0.04	0.13	-0.01	0.12	-0.14	0.07	-0.1	-0.02	-0.02	-0.12	0.08	0.26	-0.05	-0.15	-0.13	0.07	-0.06	-0.19	0.14	0.37	0.25	0.23	0.08	0.31	0.06	-0.23	-0.05	-0.06	-0.11	0.08	-0.1	-0.1	-0.17	0.17	0.02	-0.03
p__Firmicutes__g__Phascolarctobacterium_3138798	0.03	-0.16	0	0.34	0.15	0.05	-0.17	-0.15	-0.03	0.04	-0.15	-0.06	-0.03	-0.02	-0.09	-0.02	0.16	0.04	-0.04	-0.11	0	-0.03	-0.12	0.04	0.12	0.14	-0.18	0.1	-0.03	0.17	-0.15	0.31	0.39	0.3	0.15	0.2	0.38	0.12	-0.12	0.07	-0.07	0.01	0.02	-0.08	0.04	-0.06	0.06	-0.09	-0.04
p__Firmicutes__g__Phascolarctobacterium_275237	-0.25	0.11	0.3	0.14	-0.16	-0.09	0.49**	-0.06	-0.06	0.1	-0.17	0.14	-0.07	-0.1	0.02	0.05	0.15	-0.08	0	0.17	0.24	0.14	-0.16	0.04	0.12	-0.06	0.23	0.17	0.1	-0.03	-0.1	-0.04	-0.07	-0.06	-0.02	-0.05	-0.05	-0.06	-0.13	-0.1	-0.03	-0.06	0.01	-0.14	-0.05	0	-0.1	-0.17	-0.13
p__Firmicutes__g__Oscillospira_199422	-0.11	-0.05	0.16	0.06	-0.11	0.05	0.26	0.06	-0.19	0.11	-0.22	0.03	-0.03	-0.31	-0.19	0.23	0.15	0.18	-0.09	0	-0.01	-0.11	-0.13	-0.17	0.09	0.12	-0.19	-0.19	0.15	-0.09	-0.14	0.21	0.02	0.12	0.11	-0.02	0.02	0.12	-0.02	-0.2	-0.09	0.26	0.05	0.02	0.31	-0.17	-0.12	-0.11	0.11
p__Firmicutes__g__Megasphaera_817140	0.07	0.06	-0.02	0.21	0.1	-0.05	-0.04	-0.04	-0.04	0.06	-0.09	-0.1	-0.04	-0.06	0.21	-0.08	-0.05	-0.04	0.02	-0.06	0.19	0.2	-0.13	-0.06	0.07	-0.22	-0.21	-0.14	-0.12	-0.02	-0.06	-0.02	0.46**	0.50**	0.23	-0.03	0.57***	0.46**	-0.07	-0.06	-0.02	-0.04	-0.1	-0.08	-0.03	-0.12	-0.06	-0.13	-0.08
p__Firmicutes__g__Megasphaera_4296242	-0.17	0.06	0.22	0.08	-0.18	-0.05	0.43*	-0.04	-0.04	0.06	-0.09	0.16	-0.04	-0.06	-0.08	-0.08	0.36	-0.04	-0.01	0.21	0.22	0.22	-0.22	-0.01	-0.2	-0.11	0.12	0.12	0.03	-0.02	-0.06	-0.02	-0.04	-0.04	0.13	-0.03	-0.03	-0.04	-0.07	-0.06	-0.02	-0.04	0.21	-0.08	-0.03	-0.02	-0.06	-0.02	-0.08
p__Firmicutes__g__Megasphaera_264967	0.14	0.11	0.02	0.28	0.17	-0.09	-0.07	-0.06	-0.06	0.1	-0.01	-0.03	-0.07	-0.1	0.36	-0.14	-0.08	-0.08	0.06	0.02	0.1	0.08	-0.14	-0.01	0.03	0.02	-0.07	0.04	-0.14	-0.03	-0.1	-0.04	0.49**	0.26	0.17	0.3	0.31	0.24	0.03	-0.1	-0.03	-0.06	0.12	0.04	-0.05	-0.06	-0.1	-0.1	-0.13
p__Firmicutes__g__Megamonas_325808	-0.02	-0.06	-0.24	-0.15	0.13	-0.07	-0.07	-0.03	-0.03	-0.01	-0.05	-0.04	-0.01	-0.07	-0.18	-0.11	0.23	0.27	-0.25	0.05	-0.02	0.03	0	-0.09	-0.07	0.28	-0.01	0.14	0.08	0.2	-0.12	0.12	0.06	0.13	0.39	0.17	0.05	0.27	-0.04	-0.18	0.25	-0.03	0.2	0.03	0.33	-0.15	-0.17	0.12	0.12
p__Firmicutes__g__Lactobacillus__s__zeae_73609	0.09	0.09	0.19	0.19	-0.08	-0.21	0.26	0.18	-0.04	0.2	-0.32	0.12	-0.23	-0.14	-0.08	-0.01	0.29	0.19	0.02	0.15	0.19	0.1	-0.14	0.1	-0.14	0.05	-0.22	-0.3	0.16	-0.1	-0.23	0.03	0.12	0.25	0.25	0.13	0.16	0.14	-0.05	-0.07	0.07	-0.02	0.16	-0.12	0.21	-0.24	-0.14	0.07	-0.06
p__Firmicutes__g__Lactobacillus__s__reuteri_411486	-0.22	0.13	-0.04	0.03	-0.09	-0.11	0.17	-0.07	0.2	-0.25	-0.05	0.21	-0.08	0.07	-0.17	0.01	-0.1	0.35	-0.13	0.05	0.07	0.02	0.18	-0.11	-0.12	-0.15	0.14	0.22	-0.18	0.50**	-0.12	-0.05	0.15	-0.07	-0.17	-0.06	-0.06	-0.07	0.34	-0.11	-0.04	-0.07	-0.12	-0.16	0.23	-0.03	-0.11	-0.11	-0.16
p__Firmicutes__g__Lactobacillus_588197	-0.28	0.16	0.2	0.07	-0.2	-0.13	0.48**	-0.09	0.12	-0.01	-0.11	0.19	0.11	0.03	-0.1	-0.07	0.05	0.06	-0.02	0.06	0.16	0.04	-0.14	-0.08	-0.12	-0.27	0.08	0.31	-0.03	0.37	-0.15	-0.06	-0.1	-0.09	-0.01	-0.08	-0.08	-0.09	0.29	-0.14	-0.04	-0.09	0.18	0.04	-0.08	-0.08	0.01	0	-0.06
p__Firmicutes__g__Lactobacillus_354905	-0.02	0.19	-0.1	0	-0.07	0.02	-0.05	0.01	0.16	-0.17	0.19	0.38	-0.07	0.01	-0.11	-0.06	0.23	0.06	0.02	0.17	0.06	0.12	0.06	-0.25	-0.13	0.08	0.11	0.28	-0.41*	0.21	0.07	0.07	0.07	0.12	-0.08	0.36	0	0.12	0.33	-0.16	-0.08	0.01	0.21	0.08	0.22	0.31	-0.16	-0.16	-0.14
p__Firmicutes__g__Lactobacillus_292057	0.22	-0.39	0.1	0.11	0.14	-0.07	-0.06	-0.05	-0.05	0.08	-0.13	-0.15	-0.06	0.19	0.08	-0.11	-0.07	-0.06	0.31	0.05	-0.1	-0.02	0.3	0.01	-0.19	-0.25	0.05	-0.04	0.15	-0.02	-0.08	-0.04	-0.06	-0.05	-0.12	-0.04	-0.04	-0.05	-0.1	-0.08	-0.02	-0.05	-0.14	-0.11	-0.04	-0.08	-0.08	-0.11	-0.11
p__Firmicutes__g__Lactobacillus_202131	0.07	0.06	-0.02	0.21	0.1	-0.05	-0.04	-0.04	-0.04	0.06	-0.09	-0.1	-0.04	-0.06	-0.08	-0.08	0.36	-0.04	0.04	0.1	0.18	0.16	-0.19	-0.2	-0.06	0.08	-0.2	-0.19	-0.15	-0.02	-0.06	-0.02	-0.04	-0.04	-0.08	-0.03	-0.03	-0.04	-0.07	-0.06	-0.02	0.50**	-0.1	-0.08	-0.03	-0.18	-0.06	-0.13	-0.08
p__Firmicutes__g__Lactobacillus_1995182	0.01	0.14	-0.15	0.11	-0.08	0.04	-0.09	-0.01	0.21	-0.2	0.05	0.24	-0.2	-0.03	-0.22	0.07	0.29	0.12	0.05	0.16	0.07	0.02	0.11	-0.14	-0.15	0	0.07	0.09	-0.24	0.12	0.01	0.05	0.07	0.12	-0.01	0.2	0.01	-0.02	0.32	-0.01	-0.09	-0.05	0.16	-0.06	0.2	0.23	-0.2	-0.12	-0.12
p__Firmicutes__g__Lachnospira_369486	0	0.23	-0.04	0.07	0.08	-0.04	0.16	-0.13	-0.13	0.2	0.02	-0.05	0.02	-0.2	0.3	-0.18	0.07	-0.04	0.19	0.02	0.3	0.01	-0.09	0.24	0.06	-0.25	-0.11	-0.02	0.1	-0.06	-0.09	0.13	0.19	0.24	0.3	0.08	0.3	0.06	-0.18	-0.05	0.22	0.02	0.23	0.21	-0.11	-0.07	0.09	-0.02	0.01
p__Firmicutes__g__Lachnospira_350865	0.01	0.2	-0.05	-0.1	0.22	-0.17	-0.13	0.07	-0.11	0.04	0.21	0.04	0.2	-0.18	0.15	-0.12	-0.01	0	-0.08	-0.09	0.05	0.01	-0.12	-0.08	0.2	0.16	-0.11	0.04	-0.17	-0.06	-0.08	0.18	0.2	0.23	0.05	0.14	0.09	0.22	-0.15	-0.18	0.28	0.27	0.29	0.17	0.1	0.04	-0.18	0	-0.03
p__Firmicutes__g__Jeotgalicoccus__s__psychrophilus_336703	0.07	0.16	-0.11	-0.17	0.02	0.19	-0.1	-0.09	-0.09	0.14	0.23	-0.04	0.92***	-0.14	-0.1	-0.2	-0.12	-0.11	0.14	-0.12	-0.13	-0.06	-0.12	0	-0.04	0.01	-0.14	0.19	0.13	-0.04	0.29	-0.06	-0.1	-0.09	-0.21	0.16	-0.08	-0.09	0.08	0.01	-0.04	-0.09	0.40*	0.64***	-0.08	0.07	0.01	-0.14	-0.19
p__Firmicutes__g__Granulicatella_521851	-0.13	0.16	-0.22	-0.02	0.25	-0.13	-0.1	-0.09	-0.09	-0.01	-0.11	-0.14	0.51**	-0.14	-0.1	-0.2	-0.12	0.26	-0.15	-0.16	-0.13	-0.11	-0.08	-0.12	0.08	-0.05	-0.07	0.12	0.04	-0.04	0.17	-0.06	0.3	0.12	0.07	-0.08	0.16	0.11	0.07	-0.14	0.40*	-0.09	0.23	0.24	0.17	-0.09	-0.14	-0.15	-0.1
p__Firmicutes__g__Faecalibacterium__s__prausnitzii_851865	0.19	0.09	-0.09	0.06	0.22	-0.14	-0.05	-0.01	-0.16	0.25	-0.12	-0.23	-0.02	-0.25	0.29	-0.21	0.28	-0.11	0.33	-0.03	0.12	0	-0.09	0.02	0.08	-0.1	-0.17	-0.23	0.04	-0.08	-0.15	0.35	0.15	0.35	0.38	0.19	0.27	0.31	-0.18	-0.15	0.14	0.18	0.25	0.29	0.03	-0.22	0.05	0	-0.04
p__Firmicutes__g__Faecalibacterium__s__prausnitzii_514523	-0.03	0.05	0.02	0.14	0.27	-0.14	-0.11	-0.1	-0.1	0.16	0.07	0.03	0.43*	-0.16	0.24	-0.21	-0.13	-0.12	0.34	-0.09	-0.02	-0.07	-0.11	-0.02	0.06	-0.11	-0.05	0.14	-0.07	-0.05	-0.02	0.26	0.1	0.13	0.11	0.37	0.17	0.11	0.05	-0.15	-0.05	0.12	0.26	0.42*	-0.08	0.06	-0.15	-0.21	-0.21
p__Firmicutes__g__Eubacterium__s__dolichum_851715	-0.03	0.06	0.07	0.08	0.1	-0.05	-0.04	-0.04	-0.04	0.06	0.18	0.16	-0.04	-0.06	0.21	-0.08	-0.05	-0.04	0.17	0.17	0.1	-0.01	0.08	0.09	-0.12	0.11	0.1	0.2	-0.08	-0.02	-0.06	-0.02	-0.04	-0.04	0.14	0.59***	-0.03	-0.04	0.2	-0.06	-0.02	-0.04	0.13	0.24	-0.03	0.21	-0.06	-0.13	-0.08
p__Firmicutes__g__Eubacterium__s__dolichum_587530	-0.17	0.25	-0.40*	-0.15	0.31	-0.09	-0.16	-0.14	-0.14	-0.15	-0.04	-0.17	0.61***	-0.22	-0.19	-0.11	0.05	0.08	-0.07	-0.31	-0.23	-0.14	-0.08	-0.13	0.15	0.17	-0.1	0.16	-0.03	-0.07	0.1	0.08	0.11	-0.01	0.09	0.36	0.02	-0.02	0.3	-0.11	0.21	-0.14	0.3	0.38	0.07	-0.03	-0.14	-0.23	-0.14
p__Firmicutes__g__Eubacterium__s__dolichum_579851	-0.16	0.17	-0.34	-0.15	0.31	-0.09	-0.16	-0.14	-0.14	-0.15	-0.04	-0.11	0.61***	-0.22	-0.33	-0.02	0.04	0.18	-0.1	-0.24	-0.24	-0.1	-0.13	-0.21	0.09	0.23	-0.08	0.22	0.02	-0.07	0.1	0.08	0.11	0	0.02	0.19	0.04	0	0.22	-0.11	0.2	-0.14	0.32	0.38	0.22	0.05	-0.15	-0.16	-0.07
p__Firmicutes__g__Eubacterium__s__dolichum_548587	-0.21	0.06	-0.22	-0.07	0.1	-0.05	-0.04	-0.04	-0.04	-0.31	-0.09	-0.1	-0.04	-0.06	-0.08	-0.08	0.36	-0.04	-0.19	-0.2	-0.19	-0.22	0.07	-0.12	0.21	0.13	-0.22	-0.05	-0.17	-0.02	-0.06	-0.02	-0.04	-0.04	-0.08	-0.03	-0.03	-0.04	0.27	0.27	-0.02	-0.04	-0.1	-0.08	-0.03	-0.09	-0.06	-0.13	-0.08
p__Firmicutes__g__Eubacterium__s__dolichum_493391	-0.12	0.06	0.18	0.02	0.1	-0.05	-0.04	-0.04	-0.04	0.06	0.18	-0.1	-0.04	-0.06	-0.08	0.22	-0.05	-0.04	0.13	0.2	0.22	0.21	-0.22	-0.18	0	0.22	0.02	0.14	-0.22	-0.02	-0.06	-0.02	-0.04	-0.04	-0.08	-0.03	-0.03	-0.04	-0.07	-0.06	-0.02	0.48**	-0.1	-0.08	-0.03	0.06	-0.06	0.06	0.25
p__Firmicutes__g__Epulopiscium_298247	0.19	0.01	0.08	0.08	0.04	-0.04	0.16	-0.01	-0.18	0.29	0.11	0.12	-0.11	-0.19	0.07	0.28	-0.04	-0.14	0.26	-0.07	0.24	0.05	-0.17	-0.05	0.15	0.09	-0.15	-0.02	-0.1	-0.09	-0.07	0.26	-0.11	-0.18	-0.01	0.23	-0.16	-0.06	-0.15	-0.17	0.1	0.29	0.25	0.14	-0.16	-0.18	0.01	-0.02	0.36
p__Firmicutes__g__Enterococcus_766768	-0.11	-0.11	-0.01	0.07	0.14	-0.14	0.01	-0.18	0.1	-0.02	-0.02	0.25	0.42*	0.01	0.09	-0.25	-0.17	0	-0.12	-0.02	-0.04	-0.16	0.05	0.02	0	-0.01	0	0.1	-0.04	-0.09	0.2	0.06	0.19	0.1	-0.03	0.03	0.17	0.09	0.09	-0.2	-0.09	-0.06	0.08	0.2	0.16	0.21	-0.28	-0.40*	-0.07
p__Firmicutes__g__Enterococcus_590982	-0.12	0.01	0.03	0.12	0.08	-0.07	0.05	-0.17	0.04	0	-0.02	0.24	0.38	-0.1	0.02	-0.21	0.12	-0.09	-0.03	0.01	0	-0.12	0.02	-0.21	0.07	-0.12	-0.12	0.09	-0.11	-0.03	0.12	0.18	0.13	0.14	-0.1	0.09	0.07	0.11	0.21	-0.25	-0.18	0.05	0.16	0.23	0.2	0.12	-0.24	-0.32	-0.14
p__Firmicutes__g__Enterococcus_4316928	-0.39	0.22	-0.13	0	0.15	-0.18	0.19	-0.12	-0.12	-0.22	-0.15	-0.09	0.48**	-0.19	-0.2	-0.15	0.26	0.02	-0.1	-0.32	-0.19	-0.25	-0.17	-0.13	0.15	0.01	-0.05	0.21	-0.15	-0.06	0.02	-0.08	0.19	0.04	-0.04	0.09	0.08	-0.12	0.22	-0.07	-0.06	-0.12	0.25	0.25	0.13	-0.03	-0.07	-0.3	-0.06
p__Firmicutes__g__Enterococcus_295146	-0.01	0.02	-0.15	-0.18	0.01	-0.01	-0.05	0.01	0.03	-0.1	-0.08	0.04	0.25	0.06	-0.09	-0.26	0.12	0.08	-0.07	0.14	-0.06	-0.03	0.16	-0.16	-0.12	-0.07	0.09	0.02	0.15	-0.08	0.25	0.05	0.12	0.16	-0.16	0	0.04	0.16	0.11	-0.13	-0.08	-0.16	0.13	0.1	0.43*	0.17	-0.08	-0.23	-0.19
p__Firmicutes__g__Enterococcus_1111582	-0.3	-0.33	-0.01	0.1	0.06	0	0.06	-0.17	-0.01	-0.07	0.03	0.23	0.1	0	-0.11	-0.04	-0.03	0.15	-0.17	0.07	0.21	0.02	0.16	-0.07	-0.11	-0.1	0.11	0.19	0.1	0.01	0.21	-0.04	-0.07	-0.05	-0.06	-0.02	-0.05	0.14	0.08	-0.05	-0.05	0.04	-0.05	-0.03	0.19	0.28	-0.28	-0.42*	0.24
p__Firmicutes__g__Dorea__s__formicigenerans_1076587	0.05	0.11	0.06	0.04	0.08	-0.19	0.18	0.03	-0.13	0.2	-0.05	0.07	0.02	-0.2	0.18	-0.07	0.19	-0.16	0.17	0.05	0.04	0.05	-0.14	0.01	0.05	0.09	0	-0.01	-0.03	-0.06	-0.21	0.39	0.17	0.22	0.26	0.44*	0.11	0.21	-0.11	-0.2	-0.06	0.06	0.28	0.17	0.07	-0.17	-0.11	-0.02	-0.27
p__Firmicutes__g__Dorea_659361	0.03	0.15	0.01	-0.03	-0.17	0.25	0.13	-0.08	-0.08	0.13	0.05	0.01	0.12	0.05	-0.19	0.11	0.06	-0.1	0.12	-0.01	-0.14	-0.03	-0.26	-0.02	0.16	0.27	0.17	0.03	0.02	-0.04	0.38	0.25	-0.09	-0.08	-0.05	0.18	-0.07	-0.08	-0.17	-0.13	-0.04	0.17	0.05	0.07	-0.07	0	0.01	-0.17	-0.03
p__Firmicutes__g__Dorea_4383093	-0.1	-0.08	0.15	-0.02	-0.04	-0.01	0.07	0.12	-0.1	0.16	-0.02	0.05	0.09	-0.16	0.33	-0.21	0.03	-0.12	0.21	-0.1	-0.03	-0.12	0.13	-0.02	0.21	-0.09	-0.15	-0.09	-0.05	-0.05	-0.16	0.26	-0.11	0.11	0.09	0.17	-0.08	0.11	-0.1	-0.15	-0.05	0.12	0.3	0.25	0.15	0.11	-0.01	0.04	-0.08
p__Firmicutes__g__Dorea_364175	-0.03	0.06	-0.16	-0.03	-0.18	-0.05	-0.04	-0.04	0.49**	-0.31	-0.09	0.16	-0.04	-0.06	-0.08	0.22	-0.05	-0.04	-0.22	-0.17	-0.19	-0.14	0	0.13	0.12	0.12	0.08	-0.22	-0.13	-0.02	-0.06	-0.02	-0.04	-0.04	0.28	-0.03	-0.03	-0.04	0.21	0.33	-0.02	-0.04	0.14	-0.08	-0.03	0.12	-0.06	-0.13	-0.08
p__Firmicutes__g__Dialister_246930	-0.01	0.2	0.22	0.26	0.04	-0.17	0.2	0.05	-0.11	0.18	-0.11	0.02	0.03	-0.18	0.27	-0.13	0.1	-0.14	0.12	0.01	0.21	0.11	-0.12	0.06	0.07	-0.04	-0.12	0.03	-0.07	-0.06	-0.19	-0.08	0.23	0.25	0.11	0.32	0.14	0.25	-0.06	-0.18	-0.06	-0.11	0.36	0.14	0.08	-0.02	-0.03	-0.06	0
p__Firmicutes__g__Dialister_128382	-0.31	0.11	-0.14	-0.07	0.17	-0.09	-0.07	-0.06	-0.06	-0.32	0	-0.18	-0.07	0.12	-0.15	0.04	-0.08	0.17	-0.11	-0.15	0.04	0.05	0	-0.18	-0.05	0.11	0.12	0.2	-0.14	-0.03	0.13	-0.04	0.2	-0.06	-0.14	-0.05	-0.05	-0.06	0.2	0.12	-0.03	-0.06	-0.17	-0.14	0.29	0.14	0.13	-0.08	0.02
p__Firmicutes__g__Clostridium__s__perfringens_828483	-0.11	0.11	0.04	-0.04	0.17	-0.09	-0.07	-0.06	-0.06	-0.12	0.32	0.13	-0.07	-0.1	0.19	0.05	-0.08	-0.08	0.05	0.1	0	-0.03	0.1	-0.01	-0.13	0.06	0.13	0.08	-0.2	-0.03	-0.1	-0.04	-0.07	-0.06	-0.02	0.3	-0.05	-0.06	0.03	-0.1	-0.03	-0.06	0.15	0.23	-0.05	0.37	-0.1	-0.09	-0.13
p__Firmicutes__g__Clostridium__s__perfringens_315982	0.03	-0.15	0.01	0.09	-0.06	-0.07	-0.06	-0.05	0.33	-0.19	-0.13	0.23	-0.06	-0.08	0.08	-0.11	-0.07	0.25	-0.24	-0.06	-0.16	-0.05	0.22	-0.04	-0.07	-0.02	0.05	0.22	-0.14	0.71***	0.13	-0.04	-0.06	-0.05	-0.12	-0.04	-0.04	-0.05	0.15	-0.08	-0.02	-0.05	-0.14	-0.11	-0.04	0.07	-0.08	0.05	0.11
p__Firmicutes__g__Clostridium__s__perfringens_304779	-0.05	0.13	-0.08	-0.29	0.07	0.08	-0.08	-0.07	-0.07	-0.27	0.38	-0.07	-0.08	0.06	-0.02	0.15	-0.1	-0.09	-0.09	0.02	-0.07	0.01	0.04	-0.01	0.07	-0.15	-0.05	-0.18	-0.05	-0.04	0.03	-0.05	-0.08	-0.07	-0.17	-0.06	-0.06	-0.07	0.01	0.09	-0.04	-0.07	-0.03	0.01	-0.06	0.2	0.06	0.02	-0.16
p__Firmicutes__g__Clostridium__s__neonatale_523589	-0.22	-0.05	-0.19	-0.26	0.22	-0.23	-0.06	-0.04	0	-0.32	0.08	0.11	0.22	-0.24	-0.13	-0.03	0.09	0.22	-0.36	-0.23	-0.19	-0.21	0	-0.15	0.14	0.12	-0.16	0.08	-0.03	-0.08	0.04	0.08	0.13	0.14	0.06	0.01	0.08	0.15	0.23	-0.03	0.25	-0.03	0.23	0.05	0.38	0.17	-0.24	-0.26	0.05
p__Firmicutes__g__Clostridium__s__difficile_606927	-0.1	0.16	-0.08	-0.17	0.13	0	-0.11	-0.02	-0.11	0.02	0.31	0.09	0.3	-0.25	0.24	-0.1	-0.15	-0.03	0.17	-0.09	-0.2	-0.13	0.02	-0.1	0.09	0.05	0.1	0.09	-0.21	-0.1	-0.05	0.16	0.02	-0.12	0.13	0.29	-0.18	0.01	0.18	-0.25	-0.1	0.1	0.48**	0.48**	0.12	0.3	-0.17	-0.1	-0.12
p__Firmicutes__g__Clostridium__s__butyricum_541328	-0.12	-0.02	-0.13	-0.19	-0.02	-0.12	0.12	-0.08	0.16	-0.22	0.05	0	-0.09	-0.13	-0.05	-0.03	0.25	0.1	-0.17	0.09	0.04	0.09	-0.01	-0.08	-0.12	-0.09	0.16	0.07	-0.05	0.43*	0.02	0.25	-0.09	-0.08	0.04	0.18	-0.07	-0.08	0	-0.13	-0.04	-0.08	0.13	-0.09	-0.07	0.06	0.01	-0.05	0
p__Firmicutes__g__Clostridium__s__butyricum_238205	-0.12	0.09	-0.16	-0.18	-0.05	-0.07	-0.06	-0.05	0.32	-0.44*	0.07	0.04	-0.06	-0.08	0.09	-0.11	-0.07	0.24	-0.27	-0.07	-0.16	-0.12	0.25	0.08	-0.16	-0.07	0.17	-0.01	-0.08	0.69***	-0.08	-0.04	-0.06	-0.05	-0.12	-0.04	-0.04	-0.05	0.14	-0.08	-0.02	-0.05	-0.14	-0.11	-0.04	0.11	-0.08	-0.09	-0.11
p__Firmicutes__g__Clostridium_329073	-0.03	0.06	0.07	0.08	0.1	-0.05	-0.04	-0.04	-0.04	0.06	0.18	0.16	-0.04	-0.06	-0.08	0.22	-0.05	-0.04	0.1	0.22	0.12	0.17	-0.03	-0.15	-0.08	-0.05	0.08	0.16	-0.19	-0.02	-0.06	-0.02	-0.04	-0.04	-0.08	-0.03	-0.03	-0.04	-0.07	-0.06	-0.02	-0.04	0.22	0.25	-0.03	0.22	-0.06	0.1	-0.08
p__Firmicutes__g__Blautia__s__producta_696563	-0.07	0.13	-0.02	0.1	0.2	-0.11	-0.08	-0.07	-0.07	0.11	0.1	0.07	0.40*	-0.11	0.13	-0.16	-0.1	-0.09	0.21	-0.06	0.09	0.06	-0.22	0.07	0.17	-0.07	-0.07	0.07	-0.16	-0.04	0.06	0.35	0.16	0.19	0.13	0.24	0.23	0.17	-0.15	-0.11	-0.04	0.19	0.26	0.35	-0.06	0.07	-0.11	-0.19	-0.16
p__Firmicutes__g__Blautia__s__producta_589313	0	0.09	-0.13	0.04	0.14	-0.07	-0.06	-0.05	-0.05	0.08	0.07	0.05	0.28	-0.08	0.08	-0.11	-0.07	-0.06	-0.13	-0.02	0.09	0	-0.02	-0.02	0.01	-0.15	-0.1	-0.04	-0.07	-0.02	0.18	-0.04	0.3	0.32	0.1	-0.04	0.38	0.3	-0.1	-0.08	-0.02	-0.05	0.08	0.14	-0.04	-0.05	-0.08	-0.19	-0.11
p__Firmicutes__g__Blautia__s__producta_587269	-0.02	0.09	-0.06	-0.01	0.14	-0.07	-0.06	-0.05	-0.05	0.08	-0.13	-0.15	0.28	-0.08	-0.12	-0.11	0.22	-0.06	0.1	0.03	-0.15	0.02	-0.2	-0.08	0.12	0.15	-0.04	-0.04	0.01	-0.02	0.16	0.46**	-0.06	-0.05	0.11	0.36	-0.04	-0.05	-0.1	-0.08	-0.02	-0.05	0.3	0.3	-0.04	-0.05	0.14	0.03	-0.11
p__Firmicutes__g__Bacillus__s__flexus_656443	0	0.15	0.1	0.01	0.11	-0.12	-0.09	0.14	-0.08	0.13	0.17	0.12	0.34	-0.13	-0.19	-0.04	0.06	0.11	0.05	0.13	0.12	0.14	-0.11	-0.06	0.1	0.12	-0.11	0.11	-0.1	-0.04	0.03	-0.06	-0.09	0.13	-0.19	0.22	-0.07	0.14	-0.06	0.06	-0.04	0.16	0.2	0.23	0.18	0.13	-0.13	-0.01	-0.02
p__Firmicutes__f__Ruminococcaceae_554303	-0.11	-0.03	0.04	-0.15	0.05	-0.05	0.19	-0.12	-0.12	-0.09	0.08	-0.17	0.01	-0.19	0.32	-0.15	-0.16	0.14	-0.04	-0.05	0.09	0.05	-0.04	-0.08	0.03	-0.12	-0.31	-0.21	0.06	-0.06	-0.1	-0.08	0.21	0.26	0.22	-0.1	0.32	0.43*	-0.03	-0.06	0.24	-0.12	0.04	0.21	0.13	0	0.08	-0.07	0.16
p__Firmicutes__f__Ruminococcaceae_367213	-0.01	0.12	-0.02	0.07	0.19	-0.19	0	0.02	-0.13	0.08	-0.06	-0.03	0.19	-0.2	0.19	-0.28	0.18	-0.01	0.21	-0.18	-0.07	-0.15	-0.06	-0.1	0.2	-0.07	-0.19	-0.07	-0.23	-0.06	-0.09	0.38	0.35	0.38	0.24	0.44*	0.3	0.21	-0.02	-0.2	-0.06	0.06	0.31	0.37	0.26	-0.05	0	-0.15	-0.17
p__Firmicutes__f__Ruminococcaceae_359175	0.07	0.06	-0.02	0.21	0.1	-0.05	-0.04	-0.04	-0.04	0.06	-0.09	-0.1	-0.04	-0.06	0.21	-0.08	-0.05	-0.04	0.02	-0.06	0.19	0.2	-0.13	-0.06	0.07	-0.22	-0.21	-0.14	-0.12	-0.02	-0.06	-0.02	0.46**	0.50**	0.23	-0.03	0.57***	0.46**	-0.07	-0.06	-0.02	-0.04	-0.1	-0.08	-0.03	-0.12	-0.06	-0.13	-0.08
p__Firmicutes__f__Ruminococcaceae_341724	0.03	0.15	-0.03	0.18	0.23	-0.12	-0.09	-0.08	-0.08	0.13	0.04	0.01	0.34	-0.13	0.21	-0.18	-0.11	-0.1	0.16	-0.09	0.04	0.04	-0.27	0.04	0.2	-0.01	-0.08	0.06	-0.17	-0.04	0.02	0.3	0.35	0.18	0.09	0.21	0.23	0.16	-0.17	-0.13	-0.04	0.16	0.3	0.27	-0.07	-0.02	-0.13	-0.14	-0.17
p__Firmicutes__f__Ruminococcaceae_309720	-0.1	0.07	0.08	-0.08	0.05	-0.17	0.18	0.05	-0.11	0.18	0.12	0.03	-0.13	-0.18	0.46*	-0.25	0.14	-0.14	0.22	0.1	0.14	0.09	-0.04	-0.14	0.14	-0.12	-0.06	-0.07	-0.17	-0.06	-0.19	0.47**	0.04	0.22	0.48**	0.37	0.1	0.43*	0.04	-0.18	-0.06	0.07	0.3	0.43*	0.09	0	0.08	0.12	0.01
p__Firmicutes__f__Planococcaceae_934488	0.14	0.11	-0.04	-0.09	0.07	0.13	-0.15	-0.04	-0.1	0.28	0.3	0.02	0.48**	0.44*	-0.1	-0.32	-0.06	-0.3	0.14	0.09	-0.05	0.05	-0.11	0.14	-0.1	-0.07	0.04	0.17	0.05	-0.12	0.33	0.16	-0.16	-0.12	0	0.14	-0.21	-0.12	-0.04	0.1	-0.12	-0.09	0.41*	0.41*	-0.07	0.01	0.18	0.09	-0.34
p__Firmicutes__f__Lachnospiraceae_583974	-0.11	0.09	-0.1	-0.02	0.25	-0.18	0	-0.12	-0.12	0.08	-0.15	-0.01	0.33	-0.19	-0.17	-0.05	0.12	0.14	-0.09	-0.08	-0.15	-0.06	-0.1	0.07	0.13	0.25	0.06	0.09	0.03	-0.06	0.04	0.2	0.01	-0.12	0.15	0.3	-0.1	-0.12	-0.17	-0.19	0.31	-0.12	0.26	0.15	0.08	0.04	-0.07	-0.09	-0.04
p__Firmicutes__f__Lachnospiraceae_535601	-0.08	-0.14	0.08	0.04	-0.22	0.21	-0.1	0.33	-0.09	-0.01	-0.24	-0.05	-0.1	-0.14	0.04	-0.06	0.05	0.23	-0.15	-0.07	0	0.04	0.3	-0.24	-0.08	-0.17	-0.21	-0.19	0.09	-0.04	-0.15	-0.06	0.31	0.35	0.16	-0.08	0.19	0.35	0.02	-0.14	-0.04	-0.09	-0.03	-0.11	0.41*	0.02	-0.14	0.04	-0.1
p__Firmicutes__f__Lachnospiraceae_357312	-0.12	0.18	0.15	0	0.06	-0.14	0.08	0.09	-0.1	0	0.07	0.01	0.06	-0.16	0.24	-0.09	0.01	-0.12	0.08	-0.1	0.01	-0.11	0.12	0.12	0.08	0.06	-0.06	-0.05	-0.05	-0.05	-0.16	-0.07	-0.11	0.08	-0.03	0.37	-0.08	0.08	-0.01	-0.15	-0.05	-0.1	0.26	0.22	0.12	0.19	0	-0.09	0.05
p__Firmicutes__f__Lachnospiraceae_338992	-0.09	0.09	0.08	0.12	-0.05	-0.07	0.27	-0.05	-0.05	0.08	-0.13	-0.15	-0.06	-0.08	0.29	-0.11	-0.07	-0.06	0	-0.15	0.15	0.03	-0.18	-0.08	0.16	-0.3	-0.27	-0.16	-0.15	-0.02	-0.08	-0.04	0.31	0.33	0.31	-0.04	0.39	0.31	-0.1	-0.08	-0.02	-0.05	0.09	0.08	-0.04	-0.14	0.19	-0.02	0.14
p__Firmicutes__f__Lachnospiraceae_2056188	-0.12	-0.09	0.03	-0.17	0.17	-0.09	-0.07	-0.06	-0.06	-0.33	0.16	-0.03	-0.07	-0.1	0.03	0.04	-0.08	0.18	-0.21	-0.03	-0.09	-0.07	0.01	0.02	-0.09	0.09	-0.17	-0.17	0.1	-0.03	-0.1	-0.04	0.22	0.26	0.01	-0.05	0.31	0.26	0.05	-0.1	-0.03	-0.06	-0.17	-0.14	0.31	0.18	-0.1	-0.23	0.04
p__Firmicutes__f__Gemellaceae_858896	0.02	-0.3	0.17	0.23	-0.03	0.27	0	-0.11	-0.2	0.24	-0.11	-0.31	0	0.32	0.13	-0.29	-0.06	-0.1	0.27	-0.06	-0.02	0.18	0.09	-0.09	-0.12	-0.16	-0.19	0.06	0.13	-0.1	-0.07	0.04	-0.12	-0.2	0.03	0.1	-0.17	-0.2	-0.2	-0.01	0.09	-0.05	-0.1	0.06	-0.17	-0.07	0.34	0.32	-0.07
p__Firmicutes__f__Erysipelotrichaceae_592616	-0.11	0.15	-0.13	-0.19	-0.16	-0.12	0.13	0.15	0.18	-0.22	-0.22	0.01	-0.09	-0.13	-0.05	-0.03	0.25	0.1	-0.21	-0.23	-0.24	-0.21	0.06	-0.2	0.23	0.08	-0.14	-0.25	-0.16	-0.04	-0.14	0.25	0.13	0.14	0.26	0.18	-0.07	0.15	0.2	0.06	-0.04	-0.08	0.33	0.14	0.46**	-0.05	0.19	0.07	-0.01
p__Firmicutes__f__Erysipelotrichaceae_580008	0.09	0.08	0.23	0.11	0.12	-0.22	0.16	0.08	-0.2	0.24	0.06	0.09	-0.09	-0.32	0.45*	-0.22	0.13	-0.04	0.28	0.01	0.13	0.07	-0.05	-0.07	0.04	-0.12	-0.13	-0.08	-0.09	-0.1	-0.33	0.32	0.22	0.36	0.28	0.37	0.28	0.40*	-0.16	-0.24	-0.1	-0.03	0.35	0.37	0.16	0.05	-0.03	0.03	0.03
p__Firmicutes__f__Erysipelotrichaceae_145801	-0.26	0.25	-0.03	-0.14	-0.08	-0.13	0.32	0.2	-0.22	-0.04	-0.29	-0.15	0.06	-0.3	0.05	0.17	0.08	-0.1	0.02	-0.16	-0.15	-0.25	0.02	0.24	0.26	-0.05	-0.12	-0.2	0.19	-0.17	-0.2	0.11	0.06	0.02	0.05	-0.01	-0.01	-0.03	0.12	-0.02	-0.11	-0.16	0.12	0.11	0.04	-0.37	-0.04	-0.04	-0.06
p__Firmicutes__f__Clostridiaceae_551822	-0.05	0.08	-0.12	-0.14	0.11	-0.01	0.03	-0.11	-0.11	0.18	0.32	0.06	0.56***	-0.18	0.24	-0.25	-0.15	-0.14	0.22	-0.14	0.06	-0.08	-0.07	0	0.02	-0.14	-0.05	0.1	-0.01	-0.06	0.07	0.2	0.03	0.05	0.22	0.32	0.09	0.23	0.09	-0.18	-0.06	0.08	0.49**	0.66***	-0.1	0.13	-0.05	-0.24	-0.01
p__Firmicutes__f__Clostridiaceae_359750	-0.14	-0.25	-0.12	0.02	0.07	0	-0.18	-0.15	0.21	-0.29	-0.01	-0.05	0.01	0.12	-0.15	0.06	0.03	-0.05	-0.12	-0.09	-0.09	-0.03	0.3	-0.1	-0.37	-0.01	0.06	0.07	-0.04	0.2	-0.03	-0.16	-0.15	-0.15	-0.05	-0.19	-0.19	0.01	0.22	0.11	-0.11	-0.23	-0.03	0.04	0.03	0.14	0.1	0.07	0.05
p__Firmicutes__f__Clostridiaceae_338222	0.15	0.06	-0.02	0	-0.18	0.33	-0.04	-0.04	-0.04	0.06	0.18	0.16	-0.04	0.31	-0.08	-0.08	-0.05	-0.04	0.01	-0.14	-0.13	-0.08	-0.02	0.11	0.04	0.05	0.05	0.07	0.06	-0.02	0.34	-0.02	-0.04	-0.04	-0.08	-0.03	-0.03	-0.04	-0.07	-0.06	-0.02	-0.04	-0.1	-0.08	-0.03	0.17	-0.06	-0.13	-0.08
p__Firmicutes__f__Clostridiaceae_325419	0.12	-0.26	-0.08	-0.03	0	0.04	-0.1	-0.09	0.15	-0.03	0.11	0.2	-0.1	0.02	0.02	0.06	0.06	-0.11	0	-0.21	-0.09	-0.27	0.12	-0.08	0.03	-0.09	0.06	-0.04	-0.04	-0.04	0.16	0.24	-0.1	-0.09	-0.1	-0.08	-0.08	-0.09	-0.03	0.01	-0.04	0.11	-0.06	-0.08	-0.08	0.12	0.03	-0.1	0.11
p__Firmicutes__f__Clostridiaceae_303809	-0.06	-0.08	-0.06	-0.07	-0.15	0.06	0.11	-0.06	0.15	-0.06	0	0.19	-0.21	-0.16	0.12	0.21	-0.04	-0.06	-0.04	0.01	-0.03	-0.14	0.18	0.18	-0.09	0.05	0.25	0.05	0.05	0.2	0.04	0.2	-0.29	-0.13	0.08	0.03	-0.22	-0.04	-0.03	-0.11	-0.01	0.02	0.14	-0.12	-0.08	0.25	-0.11	-0.09	0.23
p__Firmicutes__f__Clostridiaceae_2225203	-0.08	-0.15	-0.12	-0.24	0.14	-0.07	-0.06	-0.05	-0.05	-0.18	0.26	-0.15	-0.06	-0.08	-0.12	0.32	-0.07	-0.06	-0.11	0.07	0.08	0.03	0.01	-0.01	0.04	-0.17	-0.06	-0.01	0	-0.02	0.16	-0.04	-0.06	-0.05	-0.12	-0.04	-0.04	-0.05	0.12	-0.08	-0.02	-0.05	0	-0.11	-0.04	0.03	-0.08	-0.19	0.16
p__Firmicutes__f__Clostridiaceae_171681	-0.08	0.07	0.16	-0.17	0.11	-0.04	0.07	0	-0.23	0.13	0.22	-0.07	-0.06	-0.12	0.19	0.21	-0.09	-0.28	0.05	0.01	-0.03	-0.04	-0.18	-0.09	0.29	0.15	0.04	0.1	-0.11	-0.11	-0.04	0.16	-0.08	-0.01	0.07	0.27	-0.11	-0.01	-0.02	-0.16	-0.11	0.11	0.06	0.01	-0.04	0.1	-0.02	0.01	0.05
p__Firmicutes__f__Clostridiaceae_171184	-0.12	0.15	-0.01	-0.29	-0.03	0.07	0.12	-0.08	-0.08	-0.2	0.3	-0.12	-0.09	0.05	0.08	0.09	-0.11	-0.1	-0.07	0.07	-0.04	-0.06	0.04	0.14	0.07	-0.02	0.03	-0.14	0.08	-0.04	0.02	-0.06	-0.09	-0.08	-0.09	0.21	-0.07	-0.08	0.09	0.08	-0.04	-0.08	-0.12	-0.04	-0.07	0.09	0.05	-0.13	-0.17
p__Firmicutes__f__Clostridiaceae_1104963	-0.19	-0.02	0.32	0.01	0.23	-0.12	-0.09	-0.08	-0.08	-0.03	0.29	-0.11	-0.09	0.05	-0.06	0.23	-0.11	-0.1	0.01	0.16	0.1	0.17	-0.21	0.01	-0.09	0.15	0.02	0.19	-0.22	-0.04	0.06	-0.06	-0.09	-0.08	-0.05	-0.07	-0.07	-0.08	-0.03	0.05	-0.04	0.15	-0.23	-0.18	-0.07	0.17	0.06	0.07	0.14
p__Firmicutes__f__Bacillaceae_551871	0.09	0.22	-0.08	-0.31	-0.03	-0.04	0.01	0.23	-0.12	0.19	0.1	0.21	0.55***	-0.19	-0.17	-0.26	0.23	0.12	-0.02	-0.13	-0.04	-0.02	-0.07	-0.06	0.09	-0.01	-0.04	0.11	0.19	-0.06	0.04	0.43*	-0.14	0.05	0.09	0.31	-0.1	0.06	0.05	-0.19	0.24	0.07	0.57***	0.48**	0.1	0.03	-0.09	0.04	-0.12
p__Cyanobacteria__o__Streptophyta_1793401	-0.22	0.11	-0.01	-0.18	0.02	-0.09	0.2	-0.06	-0.06	-0.12	0.17	0.13	0.21	-0.1	0.03	-0.14	0.15	-0.08	-0.23	0.01	-0.04	-0.11	0.01	0.04	-0.16	-0.02	0.13	-0.02	0	-0.03	0.11	-0.04	-0.07	-0.06	-0.03	-0.05	-0.05	-0.06	-0.13	-0.1	-0.03	-0.06	0.18	0.06	-0.05	0.14	-0.1	-0.17	-0.13
p__Cyanobacteria__o__Streptophyta_153978	-0.04	0.11	-0.2	-0.14	0.17	-0.09	-0.07	-0.06	-0.06	0.1	0	-0.02	0.49**	-0.1	-0.15	-0.14	0.15	-0.08	-0.04	-0.11	-0.23	-0.18	-0.1	-0.11	0.08	0.09	-0.04	0.09	0.16	-0.03	0.12	0.36	-0.07	-0.06	0.04	0.27	-0.05	-0.06	0.09	-0.1	-0.03	-0.06	0.3	0.37	-0.05	-0.08	0.08	0.02	-0.13
p__Cyanobacteria__o__Streptophyta_1141758	0.02	0.11	0.02	-0.14	0.02	-0.09	-0.07	0.23	-0.06	0.1	0.17	0.29	0.49**	-0.1	-0.15	-0.14	0.15	-0.08	-0.14	-0.03	-0.08	-0.07	0.09	-0.06	0.08	0.16	-0.1	0.13	-0.1	-0.03	0.12	-0.04	-0.07	0.22	-0.14	0.3	-0.05	0.23	0.01	-0.1	-0.03	-0.06	0.38	0.40*	0.27	0.1	-0.1	-0.08	-0.13
p__Bacteroidetes__g__Prevotella__s__stercorea_347138	-0.03	0.06	-0.16	-0.03	-0.18	-0.05	-0.04	-0.04	0.49**	-0.31	-0.09	0.16	-0.04	-0.06	-0.08	0.22	-0.05	-0.04	-0.22	-0.17	-0.19	-0.14	0	0.13	0.12	0.12	0.08	-0.22	-0.13	-0.02	-0.06	-0.02	-0.04	-0.04	0.28	-0.03	-0.03	-0.04	0.21	0.33	-0.02	-0.04	0.14	-0.08	-0.03	0.12	-0.06	-0.13	-0.08
p__Bacteroidetes__g__Prevotella__s__copri_568118	0.05	-0.06	0.28	0.13	0.06	0.02	0.15	-0.05	-0.26	0.41*	0.1	0	0.13	-0.41*	0.43*	-0.08	-0.04	-0.12	0.18	0.18	0.19	0.21	-0.18	-0.25	0.05	0.11	-0.23	0.12	-0.11	-0.13	-0.13	0.06	0.18	0.26	0.25	0.25	0.21	0.33	-0.26	-0.27	-0.13	0.08	0.37	0.40*	0.16	0.08	-0.11	0.01	0
p__Bacteroidetes__g__Prevotella__s__copri_545061	0.23	0.07	0.04	0.23	0.13	-0.04	0.03	-0.11	-0.11	0.18	-0.02	-0.04	0.35	-0.18	0.04	-0.14	-0.01	0.03	-0.05	-0.21	-0.01	-0.07	-0.32	0.03	0.17	0.08	-0.33	-0.01	-0.08	-0.06	0.02	-0.08	0.57***	0.50**	0.15	0.13	0.59***	0.3	-0.15	-0.18	-0.06	-0.11	0.31	0.2	0.15	-0.1	-0.04	-0.27	0.1
p__Bacteroidetes__g__Prevotella__s__copri_336372	0.1	0.03	0.1	0.04	-0.05	0.16	0.07	-0.1	-0.1	0.16	0.05	-0.08	0.06	-0.16	0.34	-0.21	-0.13	0.06	0.2	0.07	0.25	0.18	-0.13	-0.01	-0.02	-0.11	-0.25	-0.01	0.12	-0.05	-0.05	-0.07	0.32	0.37	0.2	0.14	0.44*	0.35	-0.02	0.01	-0.05	-0.1	0.07	0.24	0.18	0.14	0.16	-0.13	0.05
p__Bacteroidetes__g__Prevotella__s__copri_326482	0.35	-0.09	0.04	0.27	0.19	-0.07	-0.01	-0.13	-0.13	0.2	-0.08	-0.12	-0.14	0.02	0	-0.06	0.2	-0.01	0.13	0.13	0.19	0.2	-0.3	0.04	-0.05	-0.05	-0.18	0.08	0.04	-0.06	-0.1	0.11	0.53**	0.43*	0.14	0.05	0.52**	0.23	-0.15	-0.08	-0.06	-0.13	0.14	-0.15	0.1	-0.15	0.01	-0.11	0.05
p__Bacteroidetes__g__Prevotella__s__copri_174831	0.01	-0.13	0.12	0.12	0.03	0.03	-0.1	0.11	-0.09	0.14	0	0.19	0.31	-0.14	-0.09	-0.07	0.04	0.08	-0.1	0.05	0.13	0.15	-0.01	-0.23	-0.03	0.07	-0.3	0.06	0.02	-0.04	0	-0.06	0.33	0.58***	0.16	0.2	0.46*	0.57***	-0.09	-0.14	-0.04	-0.09	0.14	0.18	0.42*	0.1	-0.14	-0.17	-0.06
p__Bacteroidetes__g__Parabacteroides__s__distasonis_585914	0.39	-0.26	0.03	0.05	-0.13	0.35	-0.06	0.14	-0.31	0.45*	-0.2	-0.26	0	0.09	0.02	0.02	0	-0.17	0.24	-0.09	-0.08	-0.02	-0.01	0.23	0.09	-0.07	-0.01	-0.03	0.43*	-0.15	-0.08	0.09	0.07	0.02	0.25	0.02	0	-0.06	-0.34	-0.12	0.15	-0.15	0.25	-0.05	-0.1	-0.33	0.01	0.19	0.01
p__Bacteroidetes__g__Parabacteroides__s__distasonis_578016	0.25	0.08	0.01	0.09	0.01	0.03	0.1	0.03	-0.2	0.25	-0.2	-0.11	0.04	-0.09	-0.01	-0.06	0.27	-0.12	-0.02	-0.11	-0.08	-0.04	-0.15	0.11	0.31	0.15	-0.08	0.01	0.16	-0.1	-0.14	0.05	0.15	0.19	0.29	0.25	0.14	0.03	-0.16	-0.18	0.2	-0.2	0.21	-0.02	-0.04	-0.31	-0.16	-0.09	-0.18
p__Bacteroidetes__g__Parabacteroides__s__distasonis_577294	0.11	0.04	0	-0.1	-0.22	0.26	0.14	0.08	-0.17	0.26	-0.08	0.02	0.04	0.02	-0.1	0.07	0.04	-0.07	0.01	-0.03	0.05	0.16	-0.21	0.09	0.2	0.12	0.1	0.03	0.24	-0.08	0.01	0.1	-0.08	-0.05	0.33	0.16	-0.01	-0.06	-0.28	-0.12	0.25	-0.02	0.04	-0.06	-0.14	-0.21	-0.02	0.11	-0.06
p__Bacteroidetes__g__Parabacteroides__s__distasonis_564140	0.16	-0.31	0.14	0.16	-0.05	0.12	0.07	0.05	-0.2	0.32	-0.35	-0.18	0.02	0.1	-0.07	-0.05	0.07	-0.04	0.07	0.07	-0.04	0.04	-0.09	0.12	-0.01	-0.01	0	0.07	0.40*	-0.1	-0.23	0.05	0.14	0.04	0.28	-0.02	0.1	-0.09	-0.23	-0.11	0.19	-0.2	0.14	-0.15	-0.04	-0.35	-0.02	0.18	-0.09
p__Bacteroidetes__g__Parabacteroides__s__distasonis_4365130	0.16	0.02	-0.05	-0.01	-0.03	-0.03	0.15	0.1	-0.16	0.17	-0.27	-0.08	-0.18	0.04	0.01	-0.14	0.26	0.04	-0.19	-0.06	-0.07	-0.05	-0.11	0.08	0.18	0.07	0.03	0.01	0.17	-0.08	-0.16	0.11	0.28	0.21	0.40*	0.04	0.14	0.07	-0.21	-0.17	0.26	-0.16	0.11	-0.16	0.15	-0.40*	-0.07	0.15	-0.13
p__Bacteroidetes__g__Parabacteroides__s__distasonis_291090	0.05	0.13	-0.03	-0.02	0.09	-0.26	0.25	0.08	-0.17	0.12	-0.32	-0.14	-0.2	-0.08	-0.01	-0.1	0.32	0.09	-0.18	-0.12	-0.04	-0.16	-0.07	-0.03	0.17	0.03	0.03	-0.02	0.08	-0.09	-0.29	0.06	0.17	0.11	0.29	0	0.01	-0.03	-0.08	-0.21	0.23	-0.17	0.2	-0.12	0.14	-0.41*	-0.09	0.18	-0.02
p__Bacteroidetes__g__Parabacteroides__s__distasonis_2497335	0.08	-0.03	0.18	0.03	-0.16	-0.12	0.16	0.28	0.02	0.12	-0.25	0.12	-0.05	0.08	-0.21	-0.14	0.27	0.18	-0.05	0.13	0.17	0.19	-0.02	0.25	0.06	-0.16	0.2	0.18	0.26	0.26	-0.26	0.06	0.09	0.26	0.1	0.16	0.2	0.08	-0.14	-0.16	0.17	-0.16	-0.02	-0.15	0.01	-0.17	-0.08	0.01	-0.12
p__Bacteroidetes__g__Parabacteroides__s__distasonis_2309802	0.06	0.09	0.19	0.18	-0.05	-0.06	0.23	0.05	-0.12	0.08	-0.24	0.04	0.01	-0.19	0	-0.15	0.40*	0.01	-0.12	0	0.14	0.06	-0.23	-0.13	0.18	0.06	-0.14	0.03	0.05	-0.06	-0.11	-0.08	0.49**	0.58***	0.07	-0.1	0.49**	0.39*	0.01	-0.09	-0.06	-0.12	0.1	-0.08	0.31	-0.14	-0.19	-0.25	-0.16
p__Bacteroidetes__g__Parabacteroides__s__distasonis_198190	-0.15	0.13	0.33	0.04	-0.22	-0.11	0.42*	0.18	-0.07	0.11	-0.19	0.2	-0.08	-0.11	-0.03	0	0.32	-0.09	-0.07	0.18	0.2	0.12	-0.06	-0.07	0.13	-0.02	0.15	0.13	0.1	-0.04	-0.12	-0.05	-0.08	0.17	-0.06	-0.06	-0.06	0.18	-0.03	-0.11	-0.04	-0.07	0.14	-0.05	0.22	-0.03	-0.11	-0.08	-0.16
p__Bacteroidetes__g__Parabacteroides__s__distasonis_186233	0.23	-0.15	0.02	0.12	-0.06	0.16	-0.01	0.09	-0.18	0.29	-0.37	-0.23	-0.01	-0.1	0.05	0.06	0.07	-0.11	0.12	-0.09	-0.19	-0.08	-0.04	0.2	0.15	0.07	-0.06	-0.12	0.29	-0.09	-0.17	0.2	0.1	-0.01	0.3	-0.01	0.04	-0.18	-0.32	-0.12	0.2	-0.08	0.2	-0.07	-0.16	-0.40*	-0.04	0.21	-0.17
p__Bacteroidetes__g__Parabacteroides__s__distasonis_174842	0.15	-0.24	0.07	0.02	-0.1	0.12	0.15	0.15	-0.27	0.42*	-0.3	-0.17	0.03	-0.05	0.06	0.12	-0.06	-0.16	0.1	-0.07	-0.11	-0.19	0.05	0.3	0.06	-0.01	0.05	-0.12	0.46*	-0.13	-0.15	0.14	-0.04	-0.12	0.32	0.01	-0.06	-0.15	-0.35	-0.21	0.15	-0.11	0.2	0.03	-0.23	-0.49**	-0.07	0.16	0.04
p__Bacteroidetes__g__Parabacteroides_198866	0	0.26	-0.01	0	0.21	-0.28	0.2	-0.05	-0.19	0.23	-0.06	-0.09	-0.02	-0.12	-0.01	-0.06	0.33	-0.08	-0.11	0.01	-0.01	-0.07	-0.37	0.06	0.35	0.21	0.01	0.17	-0.12	-0.09	-0.23	0.25	0.07	0.12	0.38	0.14	0.04	-0.05	-0.17	-0.23	0.27	0.03	0.37	0.04	-0.01	-0.31	-0.09	0.16	-0.01
p__Bacteroidetes__g__Parabacteroides_180082	0.15	0.18	0.01	0.18	0.05	-0.14	0.26	-0.1	-0.1	0.16	-0.26	-0.08	-0.11	-0.16	-0.13	0.02	0.36	0.07	-0.1	-0.09	0	0	-0.33	0.04	0.31	0.13	-0.06	0.03	0.07	-0.05	-0.16	0.23	0.23	0.11	0.23	0.16	0.15	-0.1	-0.2	-0.15	0.40*	-0.1	0.27	-0.13	-0.08	-0.38	-0.02	0.03	-0.01
p__Bacteroidetes__g__Myroides__s__odoratimimus_579933	-0.15	0.13	0.09	0.04	0.07	-0.11	0.15	-0.07	-0.07	0.11	0.24	0.34	0.42*	-0.11	-0.03	-0.16	0.1	-0.09	0.04	0.13	0.11	0.06	-0.08	0.1	-0.12	0.11	0.07	0.3	-0.13	-0.04	0.07	-0.05	-0.08	-0.07	0.04	0.57***	-0.06	-0.07	-0.01	-0.11	-0.04	-0.07	0.38	0.36	-0.06	0.22	-0.11	-0.22	-0.16
p__Bacteroidetes__g__Dysgonomonas_606755	-0.02	0.15	-0.07	-0.1	0.09	0.06	-0.09	-0.08	-0.08	0.13	0.17	0.01	1.00***	-0.13	-0.19	-0.18	-0.11	-0.1	0.05	-0.15	-0.18	-0.12	-0.15	-0.03	0.02	0.07	-0.07	0.2	0.05	-0.04	0.34	-0.06	-0.09	-0.08	-0.19	0.19	-0.07	-0.08	0.11	-0.13	-0.04	-0.08	0.47**	0.61***	-0.07	0.09	-0.13	-0.25	-0.17
p__Bacteroidetes__g__Butyricimonas_208479	0.34	0.09	0.08	0.49**	0.21	-0.17	-0.13	0.09	-0.11	0.18	-0.3	-0.14	-0.13	-0.06	-0.08	-0.14	0.29	0.18	0.11	0.05	0.25	0.23	-0.17	-0.09	-0.05	-0.04	-0.36	-0.27	0.01	-0.06	-0.19	-0.08	0.50**	0.62***	0.01	-0.1	0.51**	0.45*	-0.14	-0.03	-0.06	0.1	-0.03	-0.09	0.34	-0.31	-0.04	0.01	-0.03
p__Bacteroidetes__g__Bacteroides__s__uniformis_589071	0.15	-0.16	0.09	-0.11	-0.27	0.25	0.02	0.36	-0.22	0.33	-0.23	-0.08	-0.07	0.07	0.06	-0.18	0.05	0.09	0.16	0.02	0.03	0.11	0.16	0.26	-0.02	-0.33	0.03	-0.14	0.52**	-0.14	-0.16	0.13	0	0.1	0.38	0.08	0.03	0.07	-0.29	-0.04	0.21	-0.2	0.08	-0.06	0.05	-0.18	-0.02	0.23	-0.19
p__Bacteroidetes__g__Bacteroides__s__uniformis_572476	0.27	-0.21	0.05	-0.04	-0.07	0.06	0.01	0.19	-0.14	0.21	-0.19	-0.15	-0.15	0.25	-0.14	-0.29	0.3	0.15	0.02	0.07	0.11	0.17	0.06	0.05	-0.02	-0.35	0.07	-0.04	0.33	-0.07	-0.13	0.13	0.12	0.29	0.21	0.06	0.22	0.13	-0.21	0.03	0.31	-0.14	0	-0.17	0.03	-0.17	0.11	0.2	-0.03
p__Bacteroidetes__g__Bacteroides__s__uniformis_350277	0.11	-0.2	0.23	-0.04	-0.33	0.21	0.12	0.35	-0.14	0.21	-0.27	0.1	-0.15	0.14	-0.04	-0.2	0.17	0.15	0.03	0	-0.04	0.09	0.24	0.07	-0.02	-0.19	0.07	0.01	0.38	-0.07	-0.09	0.11	-0.15	0.01	0.05	0.05	-0.12	0.02	-0.2	0.01	0.31	-0.14	0.05	-0.17	0.06	-0.02	0.1	0.22	-0.05
p__Bacteroidetes__g__Bacteroides__s__uniformis_197072	0.1	-0.27	-0.06	-0.14	-0.11	0.19	-0.2	0.35	-0.17	0.05	-0.27	-0.19	0.04	0.04	0.01	-0.13	-0.06	0.15	0.05	-0.2	-0.13	0.07	0.27	0.05	0.04	-0.13	-0.12	-0.12	0.29	-0.09	-0.21	0.06	0.03	-0.03	0.15	0.13	0.01	-0.04	-0.11	0	0.22	-0.17	-0.06	-0.09	-0.03	-0.13	0.02	0.18	-0.03
p__Bacteroidetes__g__Bacteroides__s__plebeius_365496	0.21	0.16	-0.23	-0.21	-0.04	0.28	-0.16	0.01	-0.14	0.22	0.13	-0.03	0.23	-0.22	0.02	0.1	-0.09	-0.02	0.28	0	0.03	0.02	-0.06	0.2	-0.05	0.13	-0.05	-0.1	0.24	-0.07	0.15	0.32	-0.16	-0.14	0.22	0.2	-0.12	-0.14	-0.14	-0.08	0.3	0.2	0.3	0.3	-0.12	-0.11	0	0.19	-0.02
p__Bacteroidetes__g__Bacteroides__s__plebeius_340476	0.07	0.1	-0.01	-0.24	-0.09	0.13	0.12	0.06	-0.2	0.23	0.15	-0.18	0.08	-0.16	0.14	0.04	-0.04	-0.1	0.2	0.01	0.08	0.07	-0.14	0.2	-0.06	0.17	-0.07	-0.09	0.25	-0.1	-0.09	0.17	-0.11	-0.11	0.27	0.19	-0.17	0.03	-0.24	-0.2	0.25	0.07	0.37	0.23	-0.07	-0.14	-0.02	0.2	0.09
p__Bacteroidetes__g__Bacteroides__s__plebeius_187388	0.07	0.11	-0.16	-0.07	0.17	-0.09	-0.07	-0.06	-0.06	0.1	-0.01	-0.03	0.2	-0.1	-0.15	0.04	-0.08	0.19	-0.04	-0.13	-0.07	0.06	-0.12	0.18	0.1	0.25	-0.04	0.09	0.04	-0.03	-0.1	-0.04	-0.07	-0.06	0.27	0.29	-0.05	-0.06	-0.13	-0.1	0.59***	-0.06	0.15	0.05	-0.05	-0.07	-0.1	0.13	0
p__Bacteroidetes__g__Bacteroides__s__ovatus_535375	0.11	-0.15	0	0.07	-0.02	-0.03	0.04	0.23	-0.2	0.08	-0.53***	-0.22	-0.23	-0.13	0.09	0.08	0.12	-0.01	-0.07	-0.25	-0.21	-0.08	0.12	-0.1	0.24	0.01	-0.2	-0.15	0.15	-0.1	-0.33	0.09	0.19	0.13	0.24	0.01	0.04	0.12	-0.14	-0.07	0.24	-0.2	0.1	-0.19	0.13	-0.41*	0.05	0.19	0.01
p__Bacteroidetes__g__Bacteroides__s__ovatus_308598	0.05	-0.1	-0.1	0.07	0.02	-0.01	0.11	0.04	-0.19	-0.06	-0.37	-0.33	-0.21	-0.05	0.05	0.01	0.13	0.03	0.03	-0.26	-0.09	-0.07	0.01	-0.04	0.24	-0.16	-0.2	-0.08	0.15	-0.09	-0.31	0.04	0.33	0.08	0.12	-0.02	0.14	-0.04	-0.09	0.04	0.2	-0.19	-0.06	-0.22	0.03	-0.42*	0.12	0.02	0.04
p__Bacteroidetes__g__Bacteroides__s__ovatus_187443	0.28	0.06	-0.23	-0.19	0.08	-0.07	-0.13	0.33	-0.24	0.09	-0.3	-0.17	-0.27	-0.03	0.14	-0.12	0.19	0.05	-0.08	-0.25	-0.27	-0.23	0.07	0.15	0.28	0.06	-0.1	-0.15	0.24	-0.12	-0.22	0.23	0.2	0.13	0.29	0.08	0.04	0.02	-0.14	-0.12	0.23	-0.14	0.08	-0.12	0.13	-0.41*	-0.04	0.17	-0.04
p__Bacteroidetes__g__Bacteroides__s__fragilis_4386507	-0.07	0.05	-0.26	0.04	-0.13	-0.11	0.1	-0.14	0.42*	-0.52**	-0.31	0.02	-0.04	-0.13	0.03	-0.04	0.08	0.11	-0.24	-0.2	-0.26	-0.3	0.31	-0.25	0.05	0	0.03	-0.03	-0.17	0.29	-0.16	-0.1	0.11	-0.14	-0.33	-0.12	-0.12	-0.14	0.50**	0	-0.07	-0.14	-0.15	-0.14	0.06	-0.18	-0.09	-0.16	-0.13
p__Bacteroidetes__g__Bacteroides__s__fragilis_351231	-0.15	0.26	0	0.03	-0.09	-0.31	0.24	0.13	0.18	-0.33	-0.28	0.21	-0.1	-0.19	0.05	-0.14	0.28	0.16	-0.11	-0.25	-0.09	-0.16	0.13	-0.12	0.19	-0.05	-0.15	-0.18	-0.19	0.15	-0.19	0.01	0.14	0.08	-0.19	0.03	0.04	0.01	0.38	0.01	-0.09	-0.19	0.01	-0.11	0.13	-0.04	-0.11	-0.15	-0.1
p__Bacteroidetes__g__Bacteroides__s__fragilis_3474081	-0.39	0.06	0.02	0.05	0	-0.16	0.39	-0.11	-0.11	-0.28	-0.19	0.06	0.04	-0.17	-0.03	0	0.17	0.04	-0.08	-0.25	-0.04	-0.09	0.1	-0.35	0.19	-0.02	-0.09	0.06	-0.25	-0.05	-0.18	-0.07	0.07	-0.11	-0.17	0.11	-0.09	-0.11	0.27	-0.03	-0.05	-0.11	-0.09	-0.02	0.14	-0.11	-0.17	-0.23	-0.12
p__Bacteroidetes__g__Bacteroides__s__fragilis_2200896	-0.03	0.15	-0.26	0.1	-0.05	-0.21	-0.03	-0.01	0.42*	-0.51**	-0.38	0.01	-0.04	-0.22	-0.04	-0.12	0.41*	0.1	-0.28	-0.18	-0.33	-0.34	0.13	-0.18	0.01	0.08	0.08	0.01	-0.21	0.29	-0.15	-0.1	0.27	0.14	-0.2	-0.12	0.06	-0.02	0.40*	0	-0.07	-0.14	0.03	-0.17	0.2	-0.15	-0.09	-0.12	-0.14
p__Bacteroidetes__g__Bacteroides__s__fragilis_183603	-0.38	0.09	0.02	-0.05	-0.19	-0.18	0.48**	0.03	0.04	-0.34	-0.32	0.07	-0.14	-0.19	0	-0.04	0.24	0.15	-0.23	-0.19	-0.03	-0.15	0.21	-0.41*	0.14	-0.17	-0.06	0.04	-0.2	0.26	-0.2	-0.08	0.04	0.02	-0.12	-0.1	-0.1	0.03	0.38	-0.06	-0.06	-0.12	-0.03	-0.03	0.29	-0.22	-0.07	-0.1	-0.05
p__Bacteroidetes__g__Bacteroides__s__eggerthii_192111	0.08	0.15	0.05	0.04	0.09	-0.12	-0.09	0.17	-0.08	0.13	-0.08	0.02	0.12	-0.13	-0.05	-0.04	0.26	-0.1	0.14	0.11	0.02	0	0.06	-0.04	-0.05	0.12	-0.06	-0.01	0.05	-0.04	0.02	0.25	-0.09	0.16	0.06	0.48**	-0.07	0.16	0.08	-0.13	-0.04	-0.08	0.41*	0.33	0.21	-0.04	0.01	0.05	-0.04
p__Bacteroidetes__g__Bacteroides__s__coprophilus_522595	0	0.28	0.09	-0.04	-0.05	-0.13	0.24	0.16	-0.16	0.24	0	0.11	-0.18	-0.12	0.47**	0.01	-0.21	-0.19	0.17	0.07	0.2	-0.03	-0.01	0.22	0.15	-0.15	-0.1	-0.14	0.04	-0.08	-0.13	0.13	0.1	0.03	0.07	0.05	0.08	0.02	-0.16	-0.01	-0.08	0	0.09	0.23	-0.13	-0.21	0.11	0.15	-0.03
p__Bacteroidetes__g__Bacteroides__s__coprophilus_2730944	-0.09	0.2	0.14	-0.08	-0.17	-0.17	0.36	0.27	-0.11	0.18	-0.11	0.12	-0.13	-0.05	0.25	0.08	-0.15	-0.14	0.08	-0.04	0.18	-0.07	-0.01	0.24	0.16	-0.23	-0.17	-0.31	0.09	-0.06	-0.06	0.17	0.07	0.1	0.05	-0.1	0.14	0.08	-0.14	-0.04	-0.06	0.05	-0.04	0.03	-0.1	-0.35	0.1	0.08	0.09
p__Bacteroidetes__g__Bacteroides__s__caccae_187324	-0.02	0.33	-0.02	0.04	0.07	-0.31	0.21	0.28	-0.21	-0.03	-0.35	0.05	-0.16	-0.2	0.03	-0.05	0.29	0.11	-0.1	-0.28	-0.02	-0.15	-0.03	0.1	0.38	-0.03	-0.1	-0.06	0.02	-0.1	-0.27	0.16	0.35	0.22	0.05	0.18	0.18	0.05	0.04	-0.13	0.16	-0.12	0.14	-0.09	0.16	-0.32	-0.1	-0.12	0.04
p__Bacteroidetes__g__Bacteroides_589277	0.03	-0.23	-0.04	-0.1	-0.22	0.09	0.06	0.13	0.09	0.03	-0.28	-0.01	0.02	-0.05	-0.07	-0.03	0.03	0.15	-0.03	-0.09	-0.15	0.04	0.25	0.12	-0.05	-0.07	0.14	-0.03	0.28	0.13	-0.25	0.07	-0.2	-0.18	0.32	0.17	-0.16	-0.05	-0.1	0.08	0.23	-0.18	0.09	-0.06	-0.16	-0.08	-0.01	0.1	-0.09
p__Bacteroidetes__g__Bacteroides_583117	-0.06	-0.25	0.02	0.03	-0.21	0.3	0.17	-0.01	-0.17	0.1	-0.34	-0.23	-0.1	0.06	0.01	0.04	-0.04	-0.01	0.08	-0.03	0.05	0.18	0.18	-0.14	0	-0.2	-0.08	-0.12	0.24	-0.09	-0.15	0.02	0.05	-0.04	0.24	-0.04	0.01	-0.05	-0.11	-0.07	0.14	-0.17	-0.09	-0.14	0	-0.25	-0.02	0.2	-0.26
p__Bacteroidetes__g__Bacteroides_580629	0.19	0.19	-0.01	-0.14	0	-0.01	-0.12	0.26	-0.11	0.17	0.15	0.2	0.44*	-0.17	-0.02	-0.12	-0.01	0.02	0.08	-0.1	-0.02	0.09	-0.06	0.08	0.02	0.08	-0.13	-0.03	0.01	-0.05	0.08	0.16	0.08	0.11	0.07	0.59***	0.15	0.1	-0.03	-0.17	-0.05	-0.11	0.26	0.37	-0.09	0.08	-0.06	-0.11	-0.15
p__Bacteroidetes__g__Bacteroides_577170	0.01	-0.15	-0.11	-0.05	-0.18	0.11	-0.05	0.24	0.01	-0.06	-0.42*	-0.09	0.25	-0.1	-0.19	-0.02	0.1	0.11	-0.12	-0.26	-0.28	-0.11	0.2	0.08	0.12	0	-0.06	-0.08	0.23	0.05	-0.19	0.03	0.06	0	0.2	0.13	-0.01	-0.13	0.04	-0.02	0.18	-0.26	0.17	-0.01	0.01	-0.23	-0.14	0.02	-0.21
p__Bacteroidetes__g__Bacteroides_560336	0.14	-0.38	0.08	-0.05	-0.23	0.34	-0.14	0.24	-0.12	0.19	-0.24	-0.17	-0.14	0.2	0.1	-0.06	-0.16	0.01	0.15	0.04	-0.06	0.11	0.29	0.11	0.02	-0.18	-0.07	-0.12	0.37	-0.06	-0.11	-0.08	-0.14	-0.12	0.13	-0.1	-0.1	-0.12	-0.25	0.18	0.31	-0.12	-0.12	-0.19	-0.1	-0.12	0.16	0.37	-0.09
p__Bacteroidetes__g__Bacteroides_550814	-0.11	-0.36	0.05	0.06	-0.16	0.32	-0.02	0.03	-0.14	0.02	-0.2	-0.16	0.12	0.05	-0.11	-0.11	-0.08	0.23	0.05	-0.12	-0.06	0.04	0.38	-0.06	-0.08	-0.2	-0.09	0.02	0.24	-0.07	-0.14	-0.09	-0.03	-0.14	-0.02	0.06	-0.12	-0.14	-0.05	-0.01	0.27	-0.14	-0.03	-0.1	0.05	0.04	-0.09	-0.03	-0.14
p__Bacteroidetes__g__Bacteroides_513445	0.11	-0.07	-0.02	-0.13	-0.11	0.05	-0.15	0.29	0.03	0.07	-0.27	0.03	0.42*	-0.18	0	-0.3	0.13	0.12	-0.01	-0.07	-0.26	0	0.07	0.12	0.01	0.04	-0.03	0.08	0.26	0.02	-0.15	0.11	0.07	0.15	0.31	0.29	0.09	0.06	0.07	0.01	0.21	-0.26	0.3	0.23	0.1	-0.02	-0.1	0.11	-0.26
p__Bacteroidetes__g__Bacteroides_4457872	-0.18	-0.09	-0.1	0.15	0.01	0.13	-0.07	-0.06	-0.06	-0.12	-0.17	-0.18	-0.07	0.12	0.02	0.05	-0.08	-0.08	0.05	-0.1	0.19	0.23	0.06	-0.02	-0.02	-0.27	0.09	0.11	0.04	-0.03	-0.1	-0.04	0.21	0.24	0.03	-0.05	0.29	0.22	0.06	0.09	-0.03	-0.06	-0.17	-0.14	-0.05	0.06	0.09	-0.06	0.02
p__Bacteroidetes__g__Bacteroides_4455163	0.15	0.07	-0.16	0	0.08	-0.02	-0.12	-0.11	0.11	0.01	-0.07	-0.09	0.41*	-0.04	-0.16	-0.1	0.01	0.04	0.07	-0.13	-0.07	0.15	-0.14	0.07	0.18	0.06	-0.16	-0.07	0	-0.05	0.05	0.2	0.05	0.07	0.27	0.37	0.11	0.06	-0.02	0	0.35	-0.11	0.38	0.24	-0.09	0.02	-0.05	-0.15	-0.14
p__Bacteroidetes__g__Bacteroides_4369878	0.28	-0.23	0.11	-0.18	-0.24	0.2	-0.14	0.47**	-0.12	0.19	-0.23	-0.06	0.01	0.07	0	-0.14	-0.05	0.17	0.19	-0.07	-0.13	0.1	0.25	0.22	-0.06	-0.14	-0.04	-0.18	0.44*	-0.06	-0.11	0.12	-0.14	-0.12	0.02	0.06	-0.1	-0.12	-0.17	0.04	0.31	-0.12	0.01	-0.09	-0.1	-0.07	0.13	0.28	0
p__Bacteroidetes__g__Bacteroides_4357712	0.05	-0.08	-0.11	-0.13	-0.04	0.08	-0.18	0.13	0.03	0.02	-0.16	-0.04	0.53**	-0.04	-0.22	-0.23	0.12	0.09	-0.04	-0.21	-0.29	-0.1	0.16	0.02	0.06	0.02	-0.09	0	0.2	-0.08	0.02	0.14	-0.17	-0.04	0.06	0.27	-0.13	-0.04	0.1	0.06	0.26	-0.16	0.41*	0.29	0	0.08	-0.06	-0.03	-0.18
p__Bacteroidetes__g__Bacteroides_4029632	0.12	0.02	-0.15	-0.13	0.02	0.03	-0.15	0.02	0.06	0.07	-0.02	0.03	0.42*	-0.08	-0.06	-0.18	-0.05	0.11	-0.04	-0.09	-0.17	-0.02	0.08	0.13	0.06	0.14	-0.02	0.03	0.07	-0.07	0.05	0.14	-0.15	-0.14	0.29	0.47**	-0.12	-0.14	-0.02	-0.07	0.29	-0.14	0.47**	0.36	-0.12	0.14	-0.11	-0.04	-0.14
p__Bacteroidetes__g__Bacteroides_4015273	-0.04	0.05	0.04	0.1	0.04	-0.09	0.31	-0.15	-0.15	0.14	-0.07	-0.12	-0.17	-0.23	0.62***	-0.14	-0.2	-0.08	0.2	-0.11	0.15	-0.08	0.11	-0.14	0.14	-0.21	-0.1	-0.12	-0.06	-0.07	-0.25	0.07	0.24	0.05	0.18	0.06	0.09	0.19	-0.07	-0.1	-0.07	-0.03	0.08	0.25	0.02	-0.22	0.04	0	-0.01
p__Bacteroidetes__g__Bacteroides_364926	-0.01	0.24	-0.52**	-0.11	0.3	-0.2	-0.15	-0.14	0.01	-0.35	-0.28	-0.33	-0.15	-0.21	0.06	-0.03	0.21	0.13	-0.34	-0.47**	-0.35	-0.26	-0.07	-0.09	0.34	0.28	-0.09	-0.18	-0.16	-0.07	-0.23	0.17	0.42*	0.15	0.40*	0.1	0.2	-0.01	0.09	0	0.29	-0.14	0.06	-0.13	0.08	-0.26	-0.1	0.01	-0.13
p__Bacteroidetes__g__Bacteroides_364029	0.04	-0.02	0	-0.14	-0.1	-0.07	0.04	0.27	-0.02	0.14	-0.24	0.04	0.40*	-0.14	-0.08	-0.15	0.13	0	-0.04	-0.11	-0.21	-0.04	0.03	0.2	0.06	-0.05	0.1	0.07	0.23	0.04	-0.15	0.1	-0.04	0.05	0.35	0.28	0.02	0.01	-0.01	-0.07	0.21	-0.27	0.38	0.25	-0.14	-0.16	-0.14	0.03	-0.22
p__Bacteroidetes__g__Bacteroides_359538	-0.02	0.11	-0.39*	-0.03	0.23	0.02	-0.05	-0.2	-0.2	-0.01	-0.1	-0.31	-0.13	-0.32	0.25	-0.05	0.15	0.03	0.07	-0.26	-0.03	-0.05	-0.1	-0.05	0.22	0.16	-0.06	-0.01	-0.09	-0.1	-0.18	0.24	0.29	0.06	0.47**	0.3	0.12	0.06	-0.08	-0.13	0.24	0.04	0.24	0.09	0.02	-0.16	-0.03	0.04	0.09
p__Bacteroidetes__g__Bacteroides_357582	-0.17	-0.11	0.13	0.08	-0.07	0.02	0.16	0.09	-0.16	0.14	-0.19	0.07	-0.05	0.07	0.06	-0.14	0.16	-0.1	0.03	0.13	0.17	0.13	0.2	0.04	-0.08	-0.28	0.16	0.08	0.22	-0.08	-0.05	0.11	0	0.15	0.05	0.19	0.07	0.14	-0.1	-0.14	-0.08	-0.16	0.05	-0.05	0.01	0.06	-0.04	-0.12	-0.2
p__Bacteroidetes__g__Bacteroides_356052	-0.17	0.02	0.06	0.06	0.01	0.03	0.11	-0.09	-0.09	0.14	0.12	0.2	0.12	-0.14	0.15	-0.2	0.22	-0.11	0.25	0.12	0.13	0.12	-0.1	0.09	-0.01	0.08	-0.04	0.11	-0.07	-0.04	-0.15	0.51**	-0.1	-0.09	0.31	0.69***	-0.08	-0.09	-0.07	-0.14	-0.04	0.11	0.41*	0.29	-0.08	0.18	-0.02	0	-0.19
p__Bacteroidetes__g__Bacteroides_348304	0.06	-0.16	-0.01	-0.22	-0.13	0	-0.16	0.56***	-0.14	-0.11	-0.38	-0.06	-0.16	-0.01	-0.13	-0.02	0.14	0.23	0.01	-0.21	-0.24	-0.05	0.38	-0.07	0.06	-0.09	-0.03	-0.13	0.29	-0.07	-0.24	0.08	-0.01	0	-0.08	0.02	-0.12	0	0.06	0.09	0.19	-0.14	-0.16	-0.2	0.22	-0.11	0.06	0.17	0.01
p__Bacteroidetes__g__Bacteroides_3472078	0.07	-0.03	-0.21	-0.09	0.16	-0.07	-0.14	0.05	-0.12	-0.22	-0.15	-0.18	0.15	-0.06	-0.17	-0.04	0.11	0.14	0.1	-0.36	-0.21	-0.1	0.14	-0.04	0.14	0.02	-0.16	-0.04	-0.01	-0.06	-0.12	-0.08	0.19	0.05	-0.1	0.08	0.08	-0.12	0.16	-0.07	0.25	-0.12	-0.06	-0.06	0.12	-0.13	-0.19	-0.21	-0.09
p__Bacteroidetes__g__Bacteroides_339013	-0.12	-0.01	0.05	0.13	-0.03	0.05	0.13	-0.08	-0.08	0.13	-0.09	-0.12	-0.09	0.03	0.22	-0.18	0.06	-0.1	0.15	0.02	0.14	0.11	-0.05	0.01	0.04	-0.17	-0.1	-0.02	-0.04	-0.04	-0.14	0.25	0.16	0.18	0.34	0.46**	0.23	0.16	-0.04	0.01	-0.04	-0.08	0.16	0.19	-0.07	0.01	0.34	0.08	-0.01
p__Bacteroidetes__g__Bacteroides_327050	0.19	0.06	-0.02	0.18	0.1	-0.05	-0.04	-0.04	-0.04	0.06	-0.09	-0.1	-0.04	-0.06	0.21	-0.08	-0.05	-0.04	-0.08	-0.08	-0.12	-0.07	-0.17	-0.04	0.1	0.16	0	0.02	-0.03	-0.02	-0.06	-0.02	0.40*	-0.04	-0.08	-0.03	-0.03	-0.04	-0.07	-0.06	-0.02	-0.04	0.17	-0.08	-0.03	-0.18	-0.06	0.09	-0.08
p__Bacteroidetes__g__Bacteroides_3154070	0.23	-0.32	-0.02	-0.18	-0.12	0.19	-0.14	0.27	-0.13	0.2	-0.18	-0.18	-0.02	0.14	-0.1	-0.07	-0.06	0.16	0.09	0	-0.09	0.07	0.2	0.24	-0.16	-0.1	0.06	-0.13	0.47**	-0.06	-0.13	0.11	-0.14	-0.13	0.19	0.05	-0.11	-0.13	-0.2	-0.09	0.3	-0.13	-0.02	-0.12	-0.11	-0.14	0	0.29	-0.02
p__Bacteroidetes__g__Bacteroides_313764	0.02	-0.52**	0.05	0.12	-0.17	0.47**	-0.11	-0.1	-0.1	0.16	-0.16	-0.29	0.06	0.15	-0.01	-0.08	-0.13	0.04	0.22	0.06	0.05	0.16	0.37	-0.01	-0.21	-0.28	-0.12	-0.07	0.35	-0.05	-0.06	-0.07	-0.11	-0.1	0.11	-0.08	-0.08	-0.1	-0.12	-0.02	0.33	-0.1	0.02	-0.09	-0.08	0.03	-0.02	0.1	-0.13
p__Bacteroidetes__g__Bacteroides_312140	0.1	-0.21	0.04	-0.05	-0.05	-0.01	0.05	0.2	-0.16	0.17	-0.29	-0.09	-0.06	0.08	0.04	-0.06	0.05	-0.07	0.03	-0.03	-0.15	0	0.04	0.22	0.11	0.09	0.04	0.01	0.26	-0.08	-0.27	0.05	-0.07	-0.16	0.19	0.15	-0.14	-0.16	-0.25	0.04	0.23	-0.16	0.02	-0.15	-0.14	-0.34	0.04	0.28	-0.13
p__Bacteroidetes__g__Bacteroides_305946	0.22	-0.35	-0.14	-0.08	-0.04	0.22	-0.23	0.24	-0.21	0.08	-0.37	-0.33	-0.13	0.08	-0.05	-0.03	0	0.14	-0.05	-0.14	-0.17	0.03	0.2	-0.04	0.06	-0.03	-0.12	-0.14	0.40*	-0.1	-0.22	0.07	0.15	0.09	0.24	-0.01	0.06	0.08	-0.12	0	0.22	-0.21	-0.04	-0.22	0.14	-0.28	0.01	0.25	-0.01
p__Bacteroidetes__g__Bacteroides_297057	0.04	0.11	-0.29	0.11	0.25	-0.06	-0.14	-0.12	-0.12	-0.03	-0.32	-0.36	-0.14	-0.19	0.21	-0.17	0.14	0.14	-0.1	-0.26	-0.11	-0.04	-0.09	-0.08	0.35	0.12	-0.13	-0.08	-0.06	-0.06	-0.2	0.19	0.51**	0.25	0.37	0.12	0.32	0.05	-0.08	-0.19	0.31	-0.12	0.09	-0.09	0.09	-0.2	-0.07	0.07	-0.1
p__Bacteroidetes__g__Bacteroides_2740953	-0.18	0.18	-0.26	0.04	0.16	-0.14	-0.11	-0.1	0.12	-0.3	-0.16	-0.08	0.24	-0.16	-0.23	-0.09	0.19	0.23	-0.06	-0.16	-0.19	-0.1	0.11	-0.05	0.03	0.1	-0.11	0.04	-0.15	0.37	-0.04	0.19	0.08	-0.1	-0.11	0.35	-0.08	-0.1	0.2	-0.01	-0.05	-0.1	0.15	0.12	0.15	-0.1	-0.04	-0.11	-0.08
p__Bacteroidetes__g__Bacteroides_270094	0.16	0	-0.2	-0.14	-0.1	0.05	-0.14	0.05	0.22	-0.05	-0.13	0.02	0.19	-0.07	-0.29	0.04	0.12	0.16	-0.09	-0.18	-0.19	0	0.05	0.09	0.03	0.15	-0.04	-0.16	0.18	-0.06	-0.12	0.16	-0.14	-0.12	0.29	0.33	-0.1	-0.12	0.02	0.05	0.32	-0.12	0.15	0.04	-0.1	0	0.05	0.11	-0.09
p__Bacteroidetes__g__Bacteroides_2563561	0.2	-0.34	-0.07	-0.06	-0.1	0.28	-0.15	0.09	-0.11	0.18	-0.18	-0.21	-0.11	0.16	0	-0.03	-0.09	0.06	0.01	-0.04	-0.02	0	0.36	0.17	-0.17	-0.23	-0.07	-0.24	0.40*	0.09	-0.11	0.06	-0.06	-0.01	0.28	0.09	0.04	-0.11	-0.2	-0.13	0.2	-0.21	-0.12	-0.14	-0.18	-0.23	-0.04	0.25	-0.11
p__Bacteroidetes__g__Bacteroides_209685	-0.15	0.2	-0.07	-0.07	0.13	-0.17	0.02	0.07	-0.11	-0.22	-0.1	-0.06	-0.13	-0.18	0.06	-0.25	0.56***	0	-0.09	-0.11	-0.17	-0.2	0.07	-0.03	0.18	0.19	-0.04	-0.1	-0.12	-0.06	-0.19	0.14	0.21	0.27	0.07	0.29	0.13	0.07	0.16	-0.05	-0.06	-0.11	0.08	0	0.31	0.06	-0.08	-0.2	-0.24
p__Bacteroidetes__g__Bacteroides_2061739	0.05	-0.42*	-0.01	0.1	0.02	0.19	-0.1	-0.09	-0.09	0.14	-0.24	-0.27	-0.1	0.17	0.04	-0.2	0.04	0.08	0.22	0.05	-0.04	0.13	0.28	0.05	-0.09	-0.17	-0.05	-0.06	0.28	-0.04	-0.15	0.22	-0.1	-0.09	0.16	0.15	-0.08	-0.09	-0.19	0	0.40*	-0.09	0.04	-0.12	-0.08	-0.04	0.13	0.22	-0.1
p__Bacteroidetes__g__Bacteroides_205904	0.2	0.01	0	-0.11	-0.13	0.1	-0.17	0.28	0.03	0.14	-0.06	0.09	0.43*	0.02	-0.17	-0.26	0.15	0.04	0.04	-0.01	-0.17	0.06	0.02	0.17	-0.03	-0.03	0.02	0.17	0.21	0.07	-0.07	0.06	-0.03	0.04	0.19	0.32	-0.03	-0.07	0.06	0.01	0.22	-0.26	0.43*	0.27	-0.07	0.01	-0.08	0.11	-0.29
p__Bacteroidetes__g__Bacteroides_199716	0.1	0.01	0.04	-0.25	-0.11	-0.13	-0.1	0.60***	-0.09	-0.15	-0.24	0.09	-0.1	0.02	-0.08	-0.2	0.21	0.26	-0.15	-0.13	-0.27	-0.19	0.35	0.01	0.06	-0.06	0.02	-0.08	0.13	-0.04	-0.15	-0.06	0.09	0.12	-0.21	-0.08	-0.08	0.12	0.16	0.15	-0.04	-0.09	-0.1	-0.11	0.41*	-0.04	0.01	0	0.03
p__Bacteroidetes__g__Bacteroides_198449	0.3	-0.2	0.16	-0.12	-0.21	0.07	-0.14	0.60***	-0.13	0.2	-0.34	0	-0.14	0.02	-0.01	-0.16	0.19	0.16	0.12	-0.08	-0.17	0	0.24	0.22	0.04	-0.09	-0.06	-0.21	0.37	-0.06	-0.21	0.15	-0.01	0.16	0.08	0.08	0.06	0.01	-0.19	0.03	0.28	-0.13	-0.02	-0.15	0.05	-0.14	0.13	0.34	-0.02
p__Bacteroidetes__g__Bacteroides_194909	0.21	0.17	-0.16	-0.2	0.03	-0.07	-0.16	0.18	0.05	0.09	-0.1	0.02	0.57***	-0.13	-0.17	-0.11	-0.06	0.11	-0.06	-0.25	-0.23	-0.02	-0.11	0.08	0.16	0.12	-0.08	-0.02	0.13	-0.07	0.06	0.14	-0.04	-0.01	0.2	0.29	0.02	-0.02	0	-0.08	0.28	-0.14	0.40*	0.36	-0.12	-0.05	-0.12	-0.02	-0.15
p__Bacteroidetes__g__Bacteroides_193591	0.18	-0.01	0.12	-0.09	-0.14	-0.01	-0.12	0.43*	-0.03	0.12	-0.18	0.08	0.27	-0.09	-0.05	-0.17	0.12	0.04	0.13	-0.06	-0.13	0.13	0.12	0.2	-0.02	-0.07	-0.06	-0.1	0.19	-0.09	-0.09	0.09	-0.1	0.06	0.15	0.33	-0.02	0.06	-0.07	0.06	0.22	-0.19	0.31	0.11	-0.02	0.01	-0.03	0.1	-0.13
p__Bacteroidetes__g__Bacteroides_193233	-0.12	-0.2	0.18	0.04	-0.29	0.18	0.16	0.28	-0.14	0.1	-0.38	-0.02	-0.16	-0.1	0.1	0.08	-0.07	0.08	-0.01	-0.1	0.08	0.15	0.16	-0.05	0.01	-0.23	0.02	-0.01	0.27	-0.07	-0.24	-0.1	-0.04	-0.01	0.19	-0.12	0.02	-0.02	-0.19	-0.02	0.26	-0.14	-0.09	-0.25	-0.12	-0.14	-0.02	0.2	-0.02
p__Bacteroidetes__g__Bacteroides_192839	-0.07	-0.11	0.19	0.01	-0.12	-0.05	0.2	0.2	-0.12	0.05	-0.32	0	-0.14	0.06	0.01	-0.05	0.12	-0.02	0	0.04	0.07	0.08	0.21	-0.04	-0.02	-0.2	0.33	0.2	0.22	-0.06	-0.2	-0.08	-0.14	0.03	-0.08	-0.1	-0.1	0.04	-0.05	-0.08	-0.06	-0.12	-0.03	-0.11	0.08	0.01	-0.08	-0.01	-0.09
p__Bacteroidetes__g__Bacteroides_192684	0.25	-0.14	-0.05	0.11	0.16	-0.04	-0.14	0.03	-0.12	0.19	-0.23	-0.2	-0.14	0.06	0.22	-0.26	-0.02	0.14	0.09	-0.04	-0.04	0.09	0.13	-0.01	-0.01	-0.11	0.02	0.01	0.15	-0.06	-0.2	0.17	0.19	0.09	0.27	0.3	0.13	0.07	-0.16	-0.08	0.32	-0.12	0.08	-0.01	-0.1	-0.13	0.04	0.17	-0.11
p__Bacteroidetes__g__Bacteroides_192055	-0.23	0.12	-0.03	-0.1	-0.03	-0.19	0.21	0.2	-0.13	-0.16	-0.25	-0.01	-0.14	-0.09	-0.04	-0.06	0.1	0.27	-0.23	-0.14	0.09	0.02	-0.01	-0.01	0.22	-0.15	0.17	0.11	0.14	-0.06	-0.21	-0.09	0.16	0.02	0.05	-0.11	0.05	0.01	0.04	0	0.25	-0.13	-0.16	-0.29	0.1	-0.1	-0.1	-0.13	0.12
p__Bacteroidetes__g__Bacteroides_190638	0.2	-0.06	0.05	-0.14	-0.03	-0.16	-0.12	0.52**	-0.11	-0.1	-0.28	0.01	-0.12	-0.02	0.06	-0.12	0	0.22	-0.04	-0.21	-0.26	-0.14	0.32	-0.08	0	-0.13	0.13	-0.04	0.16	-0.05	-0.18	-0.07	0.21	0.07	-0.25	-0.09	-0.09	0.08	0.08	-0.02	-0.05	-0.11	-0.08	-0.15	0.35	-0.07	-0.03	0.02	0.07
p__Bacteroidetes__g__Bacteroides_189384	0.19	0.13	0	-0.25	-0.14	-0.08	-0.02	0.34	0.06	0.07	-0.1	0.19	0.42*	-0.09	-0.23	-0.18	0.18	0.13	-0.08	-0.08	-0.16	0.04	0	0.13	0.09	0.05	0.01	-0.04	0.17	-0.07	0.07	0.17	-0.15	-0.01	0.11	0.3	-0.12	0	-0.03	0.04	0.27	-0.14	0.47**	0.26	0.03	0.06	0.01	-0.01	-0.05
p__Bacteroidetes__g__Bacteroides_187841	0.06	-0.11	-0.17	-0.01	0.1	0.05	-0.14	0.03	-0.13	0.1	-0.26	-0.23	-0.02	0.04	0	-0.08	0.08	-0.01	0.02	-0.08	-0.12	0.1	0.04	0.16	0.11	0.14	-0.14	-0.05	0.12	-0.06	-0.21	0.15	0.02	0.04	0.37	0.25	0.08	0.03	-0.16	-0.01	0.3	-0.13	0.05	-0.03	-0.11	-0.21	0	0.24	-0.19
p__Bacteroidetes__g__Bacteroides_186841	-0.13	0.16	-0.27	0.07	0.36	-0.23	-0.06	-0.16	-0.16	-0.1	-0.09	-0.08	-0.07	-0.24	0.17	0.03	0	0.06	0.03	-0.14	0	-0.12	0.12	-0.09	0.14	-0.05	0.05	0.09	-0.13	-0.08	-0.18	0.14	0.11	-0.03	0.12	0.05	0.01	-0.04	0.04	-0.16	0.17	0.01	0.24	0.11	0.08	-0.04	-0.24	-0.13	-0.03
p__Bacteroidetes__g__Bacteroides_184753	0	-0.05	-0.04	-0.06	-0.11	0.13	-0.03	0.02	0.05	0.09	-0.12	0	0.54***	0	-0.25	-0.2	0.06	0.1	0.02	-0.09	-0.13	0.08	-0.01	0.14	-0.04	-0.02	0.03	0.1	0.26	-0.07	0.04	0.15	-0.16	-0.14	0.15	0.3	-0.12	-0.14	0	0.01	0.28	-0.14	0.46*	0.27	-0.12	0.14	-0.02	-0.02	-0.15
p__Bacteroidetes__g__Bacteroides_183496	0.27	-0.04	0.17	-0.04	-0.09	-0.11	-0.08	0.48**	-0.07	0.11	-0.19	0.07	-0.08	0.06	-0.02	-0.01	-0.1	0.14	0.12	-0.04	-0.03	-0.02	0.27	0.33	-0.16	-0.24	0.13	-0.1	0.37	-0.04	-0.12	-0.05	-0.08	-0.07	-0.17	-0.06	-0.06	-0.07	-0.15	0.07	-0.04	-0.07	-0.11	-0.16	-0.06	-0.06	0.06	0.1	0.25
p__Bacteroidetes__g__Bacteroides_183480	-0.05	0.2	-0.03	-0.05	0.04	-0.17	0.03	0.05	0.07	0.05	-0.08	0.04	0.04	-0.18	-0.15	0.2	0.24	-0.14	0.09	0.1	0.07	0.02	-0.17	0.06	-0.02	0.14	0.1	-0.08	0.01	-0.06	-0.07	0.44*	-0.13	0.05	0.27	0.08	-0.1	0.05	-0.06	-0.04	-0.06	0.28	0.37	0.13	0.09	-0.1	-0.08	0.12	0
p__Bacteroidetes__g__Bacteroides_182157	0.12	-0.08	-0.12	-0.1	0.02	-0.06	-0.08	0.3	-0.17	0.01	-0.45*	-0.2	-0.19	-0.15	0.1	0.02	0.01	0.17	-0.06	-0.26	-0.24	-0.06	0.15	-0.06	0.19	0.02	-0.12	-0.2	0.21	-0.08	-0.28	0.13	0.18	0	0.27	0.06	0.05	-0.01	-0.13	-0.07	0.28	-0.17	-0.12	-0.23	0.01	-0.36	-0.04	0.2	-0.08
p__Bacteroidetes__g__Bacteroides_175535	-0.03	-0.24	0.24	0.06	-0.35	0.24	0.19	0.28	-0.16	0.18	-0.35	-0.02	-0.18	0.05	0.06	-0.07	-0.02	0.14	0.1	-0.1	-0.01	0.1	0.18	0.03	0	-0.29	-0.09	-0.14	0.32	-0.08	-0.16	0.07	0.08	0.01	0.19	0.01	0.05	0	-0.28	-0.06	0.23	-0.16	-0.09	-0.24	-0.01	-0.13	0.11	0.17	-0.07
p__Bacteroidetes__g__Bacteroides_175485	0.11	-0.05	-0.23	-0.08	0.16	-0.11	-0.16	0.17	-0.14	-0.11	-0.38	-0.26	-0.16	-0.02	0.12	-0.13	0.07	0.1	0.01	-0.28	-0.24	-0.03	0.13	-0.08	0.24	0.02	-0.1	-0.1	0.08	-0.07	-0.24	0.16	0.23	-0.01	0.1	0.09	0.03	-0.01	-0.01	0.07	0.31	-0.14	-0.05	-0.16	0.04	-0.3	0.09	0.17	-0.05
p__Bacteroidetes__g__Bacteroides_161423	-0.12	0.06	0.18	0.02	0.1	-0.05	-0.04	-0.04	-0.04	0.06	0.18	-0.1	-0.04	-0.06	-0.08	0.22	-0.05	-0.04	0.13	0.2	0.22	0.21	-0.22	-0.18	0	0.22	0.02	0.14	-0.22	-0.02	-0.06	-0.02	-0.04	-0.04	-0.08	-0.03	-0.03	-0.04	-0.07	-0.06	-0.02	0.48**	-0.1	-0.08	-0.03	0.06	-0.06	0.06	0.25
p__Bacteroidetes__g__Bacteroides_161007	0.14	-0.12	0.12	-0.09	-0.08	0.02	-0.11	0.26	-0.01	0.18	-0.1	0.07	0.44*	-0.02	-0.17	-0.23	0.07	0.13	0.04	0.04	-0.14	0.11	-0.06	0.11	-0.09	0.06	0.05	0.15	0.29	-0.09	-0.07	0.1	-0.04	0.05	0.21	0.35	-0.04	0.05	-0.01	-0.08	0.23	-0.19	0.43*	0.23	0.11	0.08	-0.11	0.08	-0.15
p__Bacteroidetes__f__Rikenellaceae_357046	0.1	0.22	0.15	0.39*	0.24	-0.18	-0.14	0.07	-0.12	0.19	-0.06	-0.1	0.15	0.07	-0.11	-0.16	0.14	0.02	0.25	0.14	0.29	0.32	-0.13	-0.02	-0.12	0.03	-0.24	-0.09	-0.15	-0.06	0.04	-0.08	0.02	0.22	-0.12	0.26	0.08	0.22	-0.08	0.08	-0.06	0.09	0.12	0.21	0.1	-0.07	0.09	0	-0.16
p__Bacteroidetes__f__Barnesiellaceae_190975	-0.03	0.06	0.07	0.08	0.1	-0.05	-0.04	-0.04	-0.04	0.06	0.18	0.16	0.43*	-0.06	-0.08	-0.08	-0.05	-0.04	0.12	-0.13	-0.04	0.09	-0.11	0.07	0.12	0.19	-0.13	0.18	-0.2	-0.02	-0.06	-0.02	-0.04	-0.04	-0.08	0.57***	-0.03	-0.04	-0.07	-0.06	-0.02	-0.04	0.2	0.26	-0.03	0.18	-0.06	-0.13	-0.08
p__Bacteroidetes__f__Barnesiellaceae_183395	-0.09	0.09	-0.27	-0.12	0.14	-0.07	-0.06	-0.05	-0.05	-0.18	-0.13	-0.15	-0.06	-0.08	0.09	-0.11	-0.07	0.24	-0.23	-0.19	-0.24	-0.21	0.14	-0.22	0.08	0.13	0.04	0.02	-0.18	-0.02	-0.08	-0.04	0.27	-0.05	0.12	-0.04	-0.04	-0.05	0.08	-0.08	-0.02	-0.05	0.01	0.06	0.38	-0.13	-0.08	0.05	-0.11
p__Bacteroidetes__f__Barnesiellaceae_180133	-0.21	0.06	0.14	-0.05	-0.18	-0.05	0.43*	-0.04	-0.04	0.06	-0.09	-0.1	-0.04	-0.06	0.21	-0.08	-0.05	-0.04	-0.02	-0.16	0.02	-0.17	-0.12	-0.05	0.15	-0.2	-0.17	-0.08	-0.1	-0.02	-0.06	-0.02	-0.04	-0.04	0.2	-0.03	-0.03	-0.04	-0.07	-0.06	-0.02	-0.04	0.23	0.2	-0.03	-0.07	0.33	0.11	0.27
p__Actinobacteria__g__Rothia__s__mucilaginosa_903426	0.32	-0.13	-0.01	0.11	0.12	0.12	-0.14	-0.12	-0.12	0.19	0.17	0	0.19	0.32	-0.19	-0.26	-0.02	0.13	0.15	-0.07	0.05	0.09	-0.08	0.23	0.05	-0.1	-0.12	0.12	0.09	-0.06	0.17	-0.08	0.02	0.06	-0.01	0.08	0.1	-0.12	-0.04	-0.05	0.24	-0.12	0.02	-0.03	-0.1	0.09	-0.19	-0.12	0.01
p__Actinobacteria__g__Rothia__s__mucilaginosa_866280	-0.16	-0.09	-0.15	-0.05	-0.13	-0.19	0.17	-0.13	0.44*	-0.32	-0.08	0.24	-0.02	-0.07	-0.01	-0.16	0.22	0.11	-0.23	0.04	-0.05	-0.07	0.01	-0.16	-0.06	0.2	0.06	-0.11	-0.13	-0.06	-0.21	0.13	0.15	0.03	0.25	0.23	0.07	0.18	0.25	0.06	-0.06	-0.13	0.07	0.05	0.26	0.08	0.02	-0.07	0.01
p__Actinobacteria__g__Eggerthella__s__lenta_682726	-0.17	-0.02	0	-0.08	-0.01	-0.03	0.11	-0.03	-0.03	-0.11	-0.17	0.15	0.47**	-0.29	-0.37	0.28	-0.03	0.08	-0.2	-0.23	-0.16	-0.06	-0.13	-0.1	0.06	0.2	-0.08	0.09	0.14	-0.09	0.1	0.01	0.03	-0.05	0.12	0.09	-0.01	-0.05	0.1	-0.17	0.12	-0.18	0.22	0.13	0.14	0	-0.23	-0.24	-0.03
p__Actinobacteria__g__Collinsella__s__stercoris_329688	-0.03	0.06	-0.16	-0.03	-0.18	-0.05	-0.04	-0.04	0.49**	-0.31	-0.09	0.16	-0.04	-0.06	-0.08	0.22	-0.05	-0.04	-0.22	-0.17	-0.19	-0.14	0	0.13	0.12	0.12	0.08	-0.22	-0.13	-0.02	-0.06	-0.02	-0.04	-0.04	0.28	-0.03	-0.03	-0.04	0.21	0.33	-0.02	-0.04	0.14	-0.08	-0.03	0.12	-0.06	-0.13	-0.08
p__Actinobacteria__g__Collinsella__s__aerofaciens_363794	0.31	0.27	0.22	0.26	0.09	-0.2	0.04	0.25	-0.19	0.3	-0.12	-0.07	-0.11	-0.21	0.12	-0.05	0.32	-0.09	0.35	0.08	0.18	0.18	-0.37	0.08	0.1	-0.06	-0.26	-0.22	-0.08	-0.09	-0.25	0.19	0.21	0.24	0.08	0.07	0.17	0.08	-0.13	-0.07	-0.09	0.25	0.26	-0.05	-0.01	-0.32	-0.05	0.12	0.01
p__Actinobacteria__g__Bifidobacterium__s__longum_72820	0.05	-0.07	0.14	0	-0.24	-0.02	0.09	0.38	0	-0.03	-0.48**	0.12	0.15	-0.21	-0.13	-0.09	0.15	0.27	-0.13	-0.17	-0.21	-0.06	0.15	-0.09	0.15	0.03	-0.08	-0.06	0.25	0	-0.23	0.01	0.22	0.17	0.03	0.01	0.08	0.07	0.15	-0.03	0.16	-0.25	0.21	0.02	0.33	-0.1	-0.13	-0.02	-0.12
p__Actinobacteria__g__Bifidobacterium__s__adolescentis_370225	0.02	0.19	0.03	0.18	-0.01	-0.16	0.05	0.11	0.08	0.04	-0.19	0.07	0.04	-0.02	0.08	-0.01	-0.14	0.04	-0.07	-0.12	0.07	0.01	0.19	0.1	0.04	-0.12	-0.04	-0.3	-0.04	-0.05	-0.06	-0.07	0.09	0.12	0.01	-0.09	0.16	0.1	-0.01	-0.03	-0.05	-0.11	-0.04	0.07	-0.09	-0.06	0	-0.01	-0.02
p__Actinobacteria__g__Bifidobacterium__s__adolescentis_235262	0.17	0.12	0.18	0.17	0.01	-0.2	0.15	0.22	-0.14	0.21	-0.21	0.11	0.1	-0.21	-0.04	-0.08	0.18	0.14	-0.12	-0.16	0.09	-0.04	-0.14	-0.06	0.11	-0.03	-0.2	-0.04	0.08	-0.07	-0.13	0.1	0.48**	0.58***	0.14	0.21	0.51**	0.40*	-0.2	-0.21	-0.07	-0.14	0.22	0.09	0.28	-0.18	-0.01	-0.05	0.11
p__Actinobacteria__g__Bifidobacterium_825808	0.39*	-0.09	0.24	0.03	-0.13	-0.07	-0.03	0.38	0.01	0.11	-0.27	0.11	0.14	-0.09	-0.03	-0.21	0.17	0.14	0	-0.04	-0.15	-0.06	-0.03	0.06	-0.07	-0.02	0.01	-0.09	0.23	-0.07	-0.03	-0.09	0.33	0.38	0.01	-0.12	0.3	0.22	-0.05	0.02	-0.07	-0.14	0.19	-0.01	0.29	-0.04	-0.09	-0.11	-0.01
p__Actinobacteria__g__Bifidobacterium_553611	0.16	-0.39	0.18	0.17	0.14	-0.07	-0.06	-0.05	-0.05	0.08	-0.13	0.05	-0.06	-0.08	0.08	-0.11	-0.07	0.25	0.11	0.04	-0.01	0.03	0.03	-0.25	-0.2	0.02	-0.15	-0.03	0.13	-0.02	-0.08	-0.04	0.3	0.35	0.07	-0.04	0.40*	0.35	-0.1	-0.08	-0.02	-0.05	-0.14	-0.11	0.40*	0.05	-0.08	-0.11	0.1
p__Actinobacteria__g__Bifidobacterium_132041	0.15	0.15	0.04	0.12	-0.06	-0.12	0.14	0.05	0.08	0.01	-0.24	0.12	-0.13	-0.09	-0.11	-0.08	0.23	0.27	-0.07	0.01	0.05	0.13	-0.03	-0.04	-0.04	0.08	-0.27	-0.28	0.05	-0.09	-0.08	0.1	-0.08	0.08	0.21	0.18	0.01	0.09	0.09	-0.04	0.25	-0.03	0.15	0.05	0.15	-0.07	0.02	0.14	0.03
p__Actinobacteria__g__Arthrobacter__s__sanguinis_1128226	0.1	0.09	-0.02	-0.06	-0.09	-0.17	0.23	0.1	0.06	0.06	-0.21	-0.04	-0.13	-0.05	-0.07	-0.04	0.32	-0.01	-0.25	-0.05	-0.06	-0.06	-0.22	-0.02	0.25	0.09	-0.08	-0.08	0.04	-0.06	-0.19	0.2	0.01	0.09	0.35	0.13	-0.1	0.09	-0.04	-0.05	0.26	-0.11	0.52**	0.03	0.14	-0.28	0.09	0.16	0.15
p__Actinobacteria__g__Arthrobacter_463861	0.12	0.07	-0.03	-0.14	0.09	0	-0.12	0.07	-0.11	0.17	0.04	-0.02	0.81***	-0.17	-0.15	-0.23	-0.01	0.01	0.05	-0.18	-0.2	-0.1	-0.01	-0.16	0.06	0.03	-0.16	0.12	0.09	-0.05	0.22	-0.07	-0.12	0.06	-0.13	0.14	-0.09	0.07	0.11	-0.17	0.29	-0.11	0.50**	0.51**	0.11	-0.01	-0.17	-0.11	-0.15
p__Actinobacteria__g__Actinomyces_1047077	-0.1	0.18	0.23	-0.07	-0.28	-0.14	0.27	0.3	0.13	0	-0.14	0.25	0.06	-0.16	0.01	-0.08	0.18	0.04	-0.13	0.02	-0.02	-0.09	-0.04	0.02	-0.04	-0.04	0.12	0.02	-0.04	-0.05	-0.04	-0.07	-0.11	0.09	0.22	0.18	-0.08	0.1	0.13	0.02	-0.05	-0.1	0.44*	0.24	0.14	0.15	0.01	-0.04	0.02
[truncated: 288 more columns]

## Sheet: b-Partial_day13-15
		beta_PA	C10	C12	C14	C16	C18	C18_1	C18_2	C18_3	C20_4n6	C22_6n3
beta_PA	correlation	1	0.227	0.461	0.853	0.812	-0.797	-0.331	-0.924	0.64	-0.395	-0.271
	significance (two tails)	.	0.773	0.539	0.147	0.188	0.203	0.669	0.076	0.36	0.605	0.729
C10	correlation	0.227	1	0.838	0.296	0.677	0.256	-0.899	-0.495	-0.348	0.035	0.419
	significance (two tails)	0.773	.	0.162	0.704	0.323	0.744	0.101	0.505	0.652	0.965	0.581
C12	correlation	0.461	0.838	1	0.712	0.618	0.161	-0.986	-0.761	-0.358	-0.512	-0.141
	significance (two tails)	0.539	0.162	.	0.288	0.382	0.839	0.014	0.239	0.642	0.488	0.859
C14	correlation	0.853	0.296	0.712	1	0.596	-0.425	-0.585	-0.944	0.197	-0.789	-0.602
	significance (two tails)	0.147	0.704	0.288	.	0.404	0.575	0.415	0.056	0.803	0.211	0.398
C16	correlation	0.812	0.677	0.618	0.596	1	-0.538	-0.574	-0.827	0.432	0.01	0.271
	significance (two tails)	0.188	0.323	0.382	0.404	.	0.462	0.426	0.173	0.568	0.99	0.729
C18	correlation	-0.797	0.256	0.161	-0.425	-0.538	1	-0.285	0.506	-0.971	0.004	0.103
	significance (two tails)	0.203	0.744	0.839	0.575	0.462	.	0.715	0.494	0.029	0.996	0.897
C18_1	correlation	-0.331	-0.899	-0.986	-0.585	-0.574	-0.285	1	0.656	0.459	0.403	0.018
	significance (two tails)	0.669	0.101	0.014	0.415	0.426	0.715	.	0.344	0.541	0.597	0.982
C18_2	correlation	-0.924	-0.495	-0.761	-0.944	-0.827	0.506	0.656	1	-0.301	0.551	0.309
	significance (two tails)	0.076	0.505	0.239	0.056	0.173	0.494	0.344	.	0.699	0.449	0.691
C18_3	correlation	0.64	-0.348	-0.358	0.197	0.432	-0.971	0.459	-0.301	1	0.208	0.054
	significance (two tails)	0.36	0.652	0.642	0.803	0.568	0.029	0.541	0.699	.	0.792	0.946
C20_4n6	correlation	-0.395	0.035	-0.512	-0.789	0.01	0.004	0.403	0.551	0.208	1	0.922
	significance (two tails)	0.605	0.965	0.488	0.211	0.99	0.996	0.597	0.449	0.792	.	0.078
C22_6n3	correlation	-0.271	0.419	-0.141	-0.602	0.271	0.103	0.018	0.309	0.054	0.922	1
	significance (two tails)	0.729	0.581	0.859	0.398	0.729	0.897	0.982	0.691	0.946	0.078	.
p__Proteobacteria__g__Trabulsiella_572750	correlation	-0.673734	-0.871699	-0.883339	-0.670792	-0.90968	0.191064	0.8621	0.847565	-0.0360676	0.204353	-0.151913
	significance (two tails)	0.326266	0.128301	0.116661	0.329208	0.0903203	0.808936	0.1379	0.152435	0.963932	0.795647	0.848087
p__Proteobacteria__g__Sutterella_215097	correlation	0.0849309	0.608332	0.123142	-0.268827	0.605892	-0.116881	-0.207636	-0.0613416	0.205674	0.764352	0.929859
	significance (two tails)	0.915069	0.391668	0.876858	0.731173	0.394108	0.883119	0.792364	0.938658	0.794326	0.235648	0.0701407
p__Proteobacteria__g__Shigella__s__sonnei_2072645	correlation	0.823806	0.718979	0.86198	0.837454	0.90095	-0.350089	-0.797816	-0.958365	0.162687	-0.392939	-0.0785454
	significance (two tails)	0.176194	0.281021	0.13802	0.162546	0.0990498	0.649911	0.202184	0.0416349	0.837313	0.607061	0.921455
p__Proteobacteria__g__Serratia_808486	correlation	0.327466	-0.627233	-0.104862	0.516207	-0.27688	-0.336516	0.24445	-0.241811	0.220854	-0.778102	-0.949715
	significance (two tails)	0.672534	0.372767	0.895138	0.483793	0.72312	0.663484	0.75555	0.758189	0.779146	0.221898	0.0502854
p__Proteobacteria__g__Ochrobactrum_256276	correlation	0.823806	0.718979	0.86198	0.837454	0.90095	-0.350089	-0.797816	-0.958365	0.162687	-0.392939	-0.0785454
	significance (two tails)	0.176194	0.281021	0.13802	0.162546	0.0990498	0.649911	0.202184	0.0416349	0.837313	0.607061	0.921455
p__Proteobacteria__g__Ochrobactrum_2458172	correlation	-0.256615	-0.343966	0.0930242	0.221172	-0.625432	0.445651	-0.0530182	0.0972316	-0.547901	-0.773951	-0.836171
	significance (two tails)	0.743385	0.656034	0.906976	0.778828	0.374568	0.554349	0.946982	0.902768	0.452099	0.226049	0.163829
p__Proteobacteria__g__Klebsiella_813217	correlation	0.598217	-0.640408	-0.285464	0.469354	0.0580984	-0.800142	0.44074	-0.340305	0.737785	-0.415126	-0.625155
	significance (two tails)	0.401783	0.359592	0.714536	0.530646	0.941902	0.199858	0.55926	0.659695	0.262215	0.584874	0.374845
p__Proteobacteria__g__Helicobacter__s__pullorum_311173	correlation
	significance (two tails)
p__Proteobacteria__g__Haemophilus__s__parainfluenzae_4296080	correlation	-0.015204	-0.618233	-0.118614	0.317146	-0.557864	0.0428468	0.213767	0.00863962	-0.138229	-0.780399	-0.948278
	significance (two tails)	0.984796	0.381767	0.881386	0.682854	0.442136	0.957153	0.786233	0.99136	0.861771	0.219601	0.0517223
p__Proteobacteria__g__Haemophilus_341460	correlation	0.648143	-0.349305	0.180104	0.788533	0.10332	-0.516007	-0.0206088	-0.588651	0.345629	-0.836228	-0.894908
	significance (two tails)	0.351857	0.650695	0.819896	0.211467	0.89668	0.483993	0.979391	0.411349	0.654371	0.163772	0.105092
p__Proteobacteria__g__Haemophilus_153997	correlation	0.0849309	0.608332	0.123142	-0.268827	0.605892	-0.116881	-0.207636	-0.0613416	0.205674	0.764352	0.929859
	significance (two tails)	0.915069	0.391668	0.876858	0.731173	0.394108	0.883119	0.792364	0.938658	0.794326	0.235648	0.0701407
p__Proteobacteria__g__Geobacter_3950373	correlation
	significance (two tails)
p__Proteobacteria__g__Erwinia_922761	correlation	-0.56872	-0.791713	-0.557621	-0.320325	-0.940683	0.335001	0.569737	0.611437	-0.286229	-0.283044	-0.563652
	significance (two tails)	0.43128	0.208287	0.442379	0.679675	0.0593174	0.664999	0.430263	0.388563	0.713771	0.716956	0.436348
p__Proteobacteria__g__Enterobacter__s__cloacae_210269	correlation	0.184712	-0.663238	-0.772348	-0.258454	-0.0222959	-0.74101	0.829636	0.204101	0.869164	0.438546	0.141445
	significance (two tails)	0.815288	0.336762	0.227652	0.741546	0.977704	0.25899	0.170364	0.795899	0.130836	0.561454	0.858555
p__Proteobacteria__g__Enhydrobacter_574102	correlation	0.309646	0.686091	0.952306	0.693743	0.363963	0.324411	-0.934706	-0.645348	-0.532844	-0.687084	-0.358399
	significance (two tails)	0.690354	0.313909	0.047694	0.306257	0.636037	0.675589	0.0652939	0.354652	0.467156	0.312916	0.641601
p__Proteobacteria__g__Delftia_1117255	correlation
	significance (two tails)
p__Proteobacteria__g__Cronobacter__s__dublinensis_667570	correlation	0.189461	0.532985	0.86207	0.645686	0.162218	0.416079	-0.841475	-0.529084	-0.621187	-0.777227	-0.499559
	significance (two tails)	0.810539	0.467015	0.13793	0.354314	0.837782	0.583921	0.158525	0.470916	0.378813	0.222773	0.500441
p__Proteobacteria__g__Comamonas_581921	correlation
	significance (two tails)
p__Proteobacteria__g__Citrobacter_674696	correlation	-0.385391	-0.965805	-0.765372	-0.323798	-0.825938	-0.018517	0.808266	0.572271	0.0975992	-0.141038	-0.502113
	significance (two tails)	0.614609	0.0341946	0.234628	0.676202	0.174062	0.981483	0.191734	0.427729	0.902401	0.858962	0.497887
p__Proteobacteria__g__Citrobacter_280706	correlation	-0.671853	-0.787926	-0.965516	-0.820896	-0.773164	0.100726	0.920845	0.897846	0.10348	0.500478	0.149504
	significance (two tails)	0.328147	0.212074	0.034484	0.179104	0.226836	0.899274	0.0791555	0.102154	0.89652	0.499522	0.850496
p__Proteobacteria__g__Campylobacter_297260	correlation
	significance (two tails)
p__Proteobacteria__g__Bilophila_361170	correlation	0.473585	-0.659258	-0.189631	0.523062	-0.128913	-0.570627	0.343465	-0.304182	0.473411	-0.647456	-0.843468
	significance (two tails)	0.526415	0.340742	0.810369	0.476938	0.871087	0.429373	0.656535	0.695818	0.526589	0.352544	0.156532
p__Proteobacteria__g__Acinetobacter_219826	correlation	0.551148	-0.678774	-0.425556	0.320544	0.0658114	-0.859049	0.56696	-0.237812	0.841557	-0.212202	-0.455692
	significance (two tails)	0.448852	0.321226	0.574444	0.679456	0.934189	0.140951	0.43304	0.762188	0.158443	0.787798	0.544308
p__Proteobacteria__f__Sphingomonadaceae_860929	correlation
	significance (two tails)
p__Proteobacteria__f__Enterobacteriaceae_9710	correlation	-0.375429	0.0623585	0.370421	0.163301	-0.494988	0.737258	-0.387152	0.0784589	-0.845513	-0.663944	-0.578871
	significance (two tails)	0.624571	0.937642	0.629579	0.836699	0.505012	0.262742	0.612848	0.921541	0.154487	0.336056	0.421129
p__Proteobacteria__f__Enterobacteriaceae_820346	correlation	-0.730633	0.317088	0.257386	-0.330963	-0.47939	0.99461	-0.37429	0.415107	-0.989891	-0.0746499	0.0550835
	significance (two tails)	0.269367	0.682912	0.742614	0.669037	0.52061	0.00538964	0.62571	0.584893	0.0101089	0.92535	0.944916
p__Proteobacteria__f__Enterobacteriaceae_816702	correlation	0.263466	0.344785	-0.0896427	-0.214541	0.630117	-0.450763	0.0506805	-0.103758	0.551686	0.769604	0.832539
	significance (two tails)	0.736534	0.655215	0.910357	0.785459	0.369883	0.549237	0.949319	0.896242	0.448314	0.230396	0.167461
p__Proteobacteria__f__Enterobacteriaceae_797229	correlation	0.98128	0.303752	0.433148	0.756909	0.889427	-0.814812	-0.322213	-0.888747	0.685834	-0.219072	-0.0814536
	significance (two tails)	0.0187203	0.696248	0.566852	0.243091	0.110573	0.185188	0.677787	0.111253	0.314166	0.780928	0.918546
p__Proteobacteria__f__Enterobacteriaceae_782953	correlation	0.930125	0.481152	0.750289	0.945578	0.825137	-0.519252	-0.643053	-0.999856	0.31524	-0.550846	-0.314094
	significance (two tails)	0.0698751	0.518848	0.249711	0.0544224	0.174863	0.480748	0.356947	0.000143931	0.68476	0.449154	0.685906
p__Proteobacteria__f__Enterobacteriaceae_754778	correlation	0.110246	-0.582067	-0.0554874	0.424316	-0.451643	-0.0540851	0.166125	-0.109307	-0.0612515	-0.827777	-0.977318
	significance (two tails)	0.889754	0.417933	0.944513	0.575684	0.548357	0.945915	0.833875	0.890693	0.938748	0.172223	0.0226816
p__Proteobacteria__f__Enterobacteriaceae_746679	correlation	-0.553523	-0.703899	-0.428181	-0.235959	-0.920081	0.411066	0.440408	0.542173	-0.390821	-0.388731	-0.62564
	significance (two tails)	0.446477	0.296101	0.571819	0.764041	0.0799194	0.588934	0.559592	0.457827	0.609179	0.611269	0.37436
p__Proteobacteria__f__Enterobacteriaceae_676211	correlation	-0.760097	-0.227095	-0.0884519	-0.323156	-0.834352	0.842545	0.0275166	0.560206	-0.832017	-0.295745	-0.356494
	significance (two tails)	0.239903	0.772905	0.911548	0.676844	0.165648	0.157455	0.972483	0.439794	0.167983	0.704255	0.643506
p__Proteobacteria__f__Enterobacteriaceae_668514	correlation	0.677621	0.523807	0.302799	0.295953	0.926015	-0.624358	-0.281516	-0.583101	0.60493	0.353786	0.524137
	significance (two tails)	0.322379	0.476193	0.697201	0.704047	0.0739849	0.375642	0.718484	0.416899	0.39507	0.646214	0.475863
p__Proteobacteria__f__Enterobacteriaceae_588216	correlation	0.954378	0.505756	0.677906	0.861203	0.915874	-0.614583	-0.579855	-0.976645	0.44193	-0.367355	-0.137902
	significance (two tails)	0.0456223	0.494244	0.322094	0.138797	0.084126	0.385417	0.420145	0.0233552	0.55807	0.632645	0.862098
p__Proteobacteria__f__Enterobacteriaceae_581782	correlation	0.818662	0.487566	0.837428	0.978072	0.680272	-0.317561	-0.735457	-0.965886	0.0871059	-0.723446	-0.468372
	significance (two tails)	0.181338	0.512434	0.162572	0.0219277	0.319728	0.682439	0.264543	0.0341136	0.912894	0.276554	0.531628
p__Proteobacteria__f__Enterobacteriaceae_581021	correlation	-0.426797	-0.952596	-0.758125	-0.347053	-0.853304	0.0325018	0.794453	0.599137	0.048482	-0.138808	-0.494967
	significance (two tails)	0.573203	0.0474037	0.241875	0.652947	0.146696	0.967498	0.205547	0.400863	0.951518	0.861192	0.505033
p__Proteobacteria__f__Enterobacteriaceae_566243	correlation	0.985902	0.385665	0.58796	0.867775	0.87914	-0.703513	-0.474427	-0.964398	0.535712	-0.3849	-0.200352
	significance (two tails)	0.0140985	0.614335	0.41204	0.132225	0.12086	0.296487	0.525573	0.035602	0.464288	0.6151	0.799648
p__Proteobacteria__f__Enterobacteriaceae_559204	correlation	-0.645875	-0.190196	0.0265043	-0.165874	-0.769401	0.803042	-0.0678913	0.4232	-0.831009	-0.443799	-0.476695
	significance (two tails)	0.354125	0.809804	0.973496	0.834126	0.230599	0.196958	0.932109	0.5768	0.168991	0.556201	0.523305
p__Proteobacteria__f__Enterobacteriaceae_538000	correlation	-0.81117	0.381042	0.0979059	-0.593407	-0.386441	0.936237	-0.252951	0.562002	-0.855077	0.328468	0.446016
	significance (two tails)	0.18883	0.618958	0.902094	0.406593	0.613559	0.0637626	0.747049	0.437998	0.144923	0.671532	0.553984
p__Proteobacteria__f__Enterobacteriaceae_528421	correlation	-0.757822	-0.77593	-0.911386	-0.815262	-0.869713	0.24355	0.860003	0.931609	-0.0533154	0.404199	0.0667091
	significance (two tails)	0.242178	0.22407	0.0886137	0.184738	0.130287	0.75645	0.139997	0.0683912	0.946685	0.595801	0.933291
p__Proteobacteria__f__Enterobacteriaceae_518002	correlation	0.963736	0.313313	0.633702	0.959289	0.759026	-0.623691	-0.505111	-0.980117	0.423495	-0.594371	-0.418635
	significance (two tails)	0.0362635	0.686687	0.366298	0.0407111	0.240974	0.376309	0.494889	0.0198831	0.576505	0.405629	0.581365
p__Proteobacteria__f__Enterobacteriaceae_4461030	correlation	0.981685	0.271312	0.575976	0.936556	0.76854	-0.685391	-0.443946	-0.967008	0.496325	-0.548721	-0.393439
	significance (two tails)	0.0183152	0.728688	0.424024	0.0634443	0.23146	0.314609	0.556054	0.0329925	0.503675	0.451279	0.606561
p__Proteobacteria__f__Enterobacteriaceae_4333897	correlation	0.858942	0.42238	0.785441	0.99019	0.682485	-0.395139	-0.672607	-0.97397	0.167596	-0.723887	-0.494022
	significance (two tails)	0.141058	0.57762	0.214559	0.00980966	0.317515	0.604861	0.327393	0.0260299	0.832404	0.276113	0.505978
p__Proteobacteria__f__Enterobacteriaceae_4111715	correlation	0.55575	0.929299	0.926477	0.614363	0.837685	-0.0304153	-0.925082	-0.780692	-0.122955	-0.209027	0.169989
	significance (two tails)	0.44425	0.0707012	0.0735232	0.385637	0.162315	0.969585	0.0749178	0.219308	0.877045	0.790973	0.830011
p__Proteobacteria__f__Enterobacteriaceae_3829957	correlation	0.933091	0.35916	0.696899	0.978581	0.738895	-0.543502	-0.573376	-0.986706	0.331512	-0.645969	-0.447742
	significance (two tails)	0.0669092	0.64084	0.303101	0.0214189	0.261105	0.456498	0.426624	0.0132937	0.668488	0.354031	0.552258
p__Proteobacteria__f__Enterobacteriaceae_368849	correlation	0.201774	0.612804	0.161878	-0.169401	0.688079	-0.21843	-0.228913	-0.163744	0.289441	0.711456	0.883532
	significance (two tails)	0.798226	0.387196	0.838122	0.830599	0.311921	0.78157	0.771087	0.836256	0.710559	0.288544	0.116468
p__Proteobacteria__f__Enterobacteriaceae_366451	correlation	-0.939667	-0.484687	-0.735832	-0.932172	-0.845973	0.543396	0.629618	0.998685	-0.345156	0.515848	0.280937
	significance (two tails)	0.0603334	0.515313	0.264168	0.0678285	0.154027	0.456604	0.370382	0.00131489	0.654844	0.484152	0.719063
p__Proteobacteria__f__Enterobacteriaceae_3531225	correlation	0.904634	0.00024444	0.431964	0.938924	0.51982	-0.665216	-0.27656	-0.865381	0.471006	-0.721552	-0.655397
	significance (two tails)	0.0953665	0.999756	0.568036	0.0610755	0.48018	0.334784	0.72344	0.134619	0.528994	0.278448	0.344603
p__Proteobacteria__f__Enterobacteriaceae_345362	correlation	0.881704	0.410543	0.765731	0.989203	0.702729	-0.435804	-0.650159	-0.980998	0.211989	-0.702098	-0.478818
	significance (two tails)	0.118296	0.589457	0.234269	0.0107969	0.297271	0.564196	0.349841	0.0190021	0.788011	0.297902	0.521182
p__Proteobacteria__f__Enterobacteriaceae_331697	correlation	-0.510128	-0.497391	-0.889531	-0.867828	-0.388912	-0.0792717	0.82097	0.773893	0.314889	0.847673	0.577367
	significance (two tails)	0.489872	0.502609	0.110469	0.132172	0.611088	0.920728	0.17903	0.226107	0.685111	0.152327	0.422633
p__Proteobacteria__f__Enterobacteriaceae_304641	correlation	-0.0763827	-0.146772	0.328514	0.426178	-0.417578	0.401272	-0.276527	-0.132808	-0.552823	-0.885748	-0.861365
	significance (two tails)	0.923617	0.853228	0.671486	0.573822	0.582422	0.598728	0.723473	0.867192	0.447177	0.114252	0.138635
p__Proteobacteria__f__Enterobacteriaceae_301149	correlation	0.890791	0.335456	0.716765	0.995733	0.665985	-0.472949	-0.592016	-0.969627	0.249891	-0.728513	-0.531892
	significance (two tails)	0.109209	0.664544	0.283235	0.00426705	0.334015	0.527051	0.407984	0.0303732	0.750109	0.271487	0.468108
p__Proteobacteria__f__Enterobacteriaceae_299267	correlation	0.803941	0.247232	0.697772	0.994885	0.513886	-0.371478	-0.569889	-0.907429	0.138824	-0.846657	-0.673362
	significance (two tails)	0.196059	0.752768	0.302228	0.0051149	0.486114	0.628522	0.430111	0.0925706	0.861176	0.153343	0.326638
p__Proteobacteria__f__Enterobacteriaceae_295053	correlation	0.904051	0.619335	0.716833	0.794096	0.961431	-0.546741	-0.640841	-0.949617	0.387325	-0.263954	1.16916e-05
	significance (two tails)	0.0959494	0.380665	0.283167	0.205904	0.038569	0.453259	0.359159	0.0503828	0.612675	0.736046	0.999988
p__Proteobacteria__f__Enterobacteriaceae_2689396	correlation	0.852855	0.50718	0.828318	0.971444	0.735343	-0.368693	-0.726674	-0.983275	0.144723	-0.669447	-0.411731
	significance (two tails)	0.147145	0.49282	0.171682	0.0285562	0.264657	0.631307	0.273326	0.0167248	0.855277	0.330553	0.588269
p__Proteobacteria__f__Enterobacteriaceae_231787	correlation	0.443848	0.163057	-0.166889	-0.071754	0.653524	-0.686765	0.173675	-0.209805	0.768197	0.645871	0.649749
	significance (two tails)	0.556152	0.836943	0.833111	0.928246	0.346476	0.313235	0.826325	0.790195	0.231803	0.354129	0.350251
p__Proteobacteria__f__Enterobacteriaceae_228556	correlation	-0.735149	-0.536633	-0.888233	-0.954118	-0.625009	0.18808	0.79961	0.928281	0.046833	0.752506	0.475754
	significance (two tails)	0.264851	0.463367	0.111767	0.045882	0.374991	0.81192	0.20039	0.0717188	0.953167	0.247494	0.524246
p__Proteobacteria__f__Enterobacteriaceae_197286	correlation	0.423049	-0.73251	-0.592538	0.111768	0.00427331	-0.845021	0.710137	-0.0655603	0.881961	0.00744618	-0.276981
	significance (two tails)	0.576951	0.26749	0.407462	0.888232	0.995727	0.154979	0.289863	0.93444	0.118039	0.992554	0.723019
p__Proteobacteria__f__Enterobacteriaceae_173654	correlation	-0.623403	0.612872	0.246083	-0.505069	-0.0830997	0.800757	-0.40373	0.375835	-0.729115	0.443326	0.640108
	significance (two tails)	0.376597	0.387128	0.753917	0.494931	0.9169	0.199243	0.59627	0.624165	0.270885	0.556674	0.359892
p__Proteobacteria__f__Enterobacteriaceae_1111294	correlation	0.918702	0.570597	0.765707	0.890739	0.895063	-0.511327	-0.674068	-0.990562	0.322283	-0.436295	-0.175404
	significance (two tails)	0.0812978	0.429403	0.234293	0.109261	0.104937	0.488673	0.325932	0.00943834	0.677717	0.563705	0.824596
p__Fusobacteria__g__Fusobacterium_572889	correlation
	significance (two tails)
p__Fusobacteria__g__Fusobacterium_444857	correlation
	significance (two tails)
p__Fusobacteria__g__Fusobacterium_4439398	correlation
	significance (two tails)
p__Fusobacteria__g__Fusobacterium_3073894	correlation
	significance (two tails)
p__Fusobacteria__g__Fusobacterium_1139769	correlation	-0.285304	-0.0249469	0.348839	0.250611	-0.490376	0.633293	-0.34151	0.0169487	-0.75678	-0.753038	-0.693619
	significance (two tails)	0.714696	0.975053	0.651161	0.749389	0.509624	0.366707	0.65849	0.983051	0.24322	0.246962	0.306381
p__Firmicutes__o__Clostridiales_564806	correlation
	significance (two tails)
p__Firmicutes__o__Clostridiales_562376	correlation
	significance (two tails)
p__Firmicutes__o__Clostridiales_509416	correlation
	significance (two tails)
p__Firmicutes__o__Clostridiales_369429	correlation
	significance (two tails)
p__Firmicutes__o__Clostridiales_316728	correlation
	significance (two tails)
p__Firmicutes__o__Clostridiales_2415201	correlation
	significance (two tails)
p__Firmicutes__o__Clostridiales_191043	correlation
	significance (two tails)
p__Firmicutes__o__Clostridiales_179067	correlation
	significance (two tails)
p__Firmicutes__g__Veillonella__s__parvula_518743	correlation
	significance (two tails)
p__Firmicutes__g__Veillonella__s__parvula_4391625	correlation
	significance (two tails)
p__Firmicutes__g__Veillonella__s__parvula_3889756	correlation
	significance (two tails)
p__Firmicutes__g__Veillonella__s__parvula_3801267	correlation
	significance (two tails)
p__Firmicutes__g__Veillonella__s__dispar_962249	correlation	-0.311059	0.726937	0.247261	-0.425834	0.302371	0.419915	-0.387313	0.166155	-0.334924	0.666848	0.887276
	significance (two tails)	0.688941	0.273063	0.752739	0.574166	0.697629	0.580085	0.612687	0.833845	0.665076	0.333152	0.112724
p__Firmicutes__g__Veillonella__s__dispar_4401373	correlation	0.823806	0.718979	0.86198	0.837454	0.90095	-0.350089	-0.797816	-0.958365	0.162687	-0.392939	-0.0785454
	significance (two tails)	0.176194	0.281021	0.13802	0.162546	0.0990498	0.649911	0.202184	0.0416349	0.837313	0.607061	0.921455
p__Firmicutes__g__Veillonella__s__dispar_4316391	correlation	0.823806	0.718979	0.86198	0.837454	0.90095	-0.350089	-0.797816	-0.958365	0.162687	-0.392939	-0.0785454
	significance (two tails)	0.176194	0.281021	0.13802	0.162546	0.0990498	0.649911	0.202184	0.0416349	0.837313	0.607061	0.921455
p__Firmicutes__g__Veillonella__s__dispar_4310208	correlation
	significance (two tails)
p__Firmicutes__g__Veillonella__s__dispar_4296244	correlation	0.99616	0.306022	0.50644	0.842794	0.859097	-0.769138	-0.386265	-0.937322	0.613039	-0.35551	-0.204504
	significance (two tails)	0.00383997	0.693978	0.49356	0.157206	0.140903	0.230862	0.613735	0.0626781	0.386961	0.64449	0.795496
p__Firmicutes__g__Veillonella__s__dispar_342427	correlation
	significance (two tails)
p__Firmicutes__g__Veillonella_4440670	correlation
	significance (two tails)
p__Firmicutes__g__Veillonella_368099	correlation
	significance (two tails)
p__Firmicutes__g__Veillonella_1144463	correlation
	significance (two tails)
p__Firmicutes__g__Veillonella_1023075	correlation	0.850696	0.14143	0.597341	0.987423	0.511232	-0.489874	-0.455793	-0.898995	0.26859	-0.818637	-0.688893
	significance (two tails)	0.149304	0.85857	0.402659	0.0125771	0.488768	0.510126	0.544207	0.101005	0.73141	0.181363	0.311107
p__Firmicutes__g__Streptococcus__s__luteciae_303161	correlation
	significance (two tails)
p__Firmicutes__g__Streptococcus_967427	correlation	0.242006	0.988446	0.904235	0.384188	0.637337	0.298085	-0.95359	-0.541065	-0.417815	-0.109399	0.283424
	significance (two tails)	0.757994	0.0115538	0.0957647	0.615812	0.362663	0.701915	0.0464101	0.458935	0.582185	0.890601	0.716576
p__Firmicutes__g__Streptococcus_593803	correlation	0.439714	0.164054	-0.168186	-0.0760406	0.651726	-0.683348	0.174157	-0.206101	0.765643	0.649485	0.653419
	significance (two tails)	0.560286	0.835946	0.831814	0.923959	0.348274	0.316652	0.825843	0.793899	0.234357	0.350515	0.346581
p__Firmicutes__g__Streptococcus_579608	correlation	0.771144	0.661297	0.916722	0.9122	0.763345	-0.23055	-0.842821	-0.955698	0.0119182	-0.599808	-0.288779
	significance (two tails)	0.228856	0.338703	0.0832783	0.0878002	0.236655	0.76945	0.157179	0.0443023	0.988082	0.400192	0.711221
p__Firmicutes__g__Streptococcus_561636	correlation	0.533126	0.939056	0.925713	0.594645	0.828209	-0.00713695	-0.928862	-0.763282	-0.142876	-0.194513	0.186953
	significance (two tails)	0.466874	0.0609443	0.0742872	0.405355	0.171791	0.992863	0.0711378	0.236718	0.857124	0.805487	0.813047
p__Firmicutes__g__Streptococcus_522025	correlation	0.437787	0.971123	0.915467	0.510547	0.783593	0.0867669	-0.936912	-0.687183	-0.222083	-0.134494	0.253899
	significance (two tails)	0.562213	0.0288768	0.0845326	0.489453	0.216407	0.913233	0.063088	0.312817	0.777917	0.865506	0.746101
p__Firmicutes__g__Streptococcus_516966	correlation	0.801054	0.387892	0.791185	0.991808	0.593986	-0.316656	-0.678606	-0.939607	0.08142	-0.798638	-0.575269
	significance (two tails)	0.198946	0.612108	0.208815	0.00819176	0.406014	0.683344	0.321394	0.0603929	0.91858	0.201362	0.424731
p__Firmicutes__g__Streptococcus_516611	correlation	0.437787	0.971123	0.915467	0.510547	0.783593	0.0867669	-0.936912	-0.687183	-0.222083	-0.134494	0.253899
	significance (two tails)	0.562213	0.0288768	0.0845326	0.489453	0.216407	0.913233	0.063088	0.312817	0.777917	0.865506	0.746101
p__Firmicutes__g__Streptococcus_349024	correlation	0.823806	0.718979	0.86198	0.837454	0.90095	-0.350089	-0.797816	-0.958365	0.162687	-0.392939	-0.0785454
	significance (two tails)	0.176194	0.281021	0.13802	0.162546	0.0990498	0.649911	0.202184	0.0416349	0.837313	0.607061	0.921455
p__Firmicutes__g__Streptococcus_3449122	correlation
	significance (two tails)
p__Firmicutes__g__Streptococcus_316587	correlation
	significance (two tails)
p__Firmicutes__g__Streptococcus_301270	correlation
	significance (two tails)
p__Firmicutes__g__Streptococcus_1082539	correlation	-0.163068	-0.0771066	-0.568808	-0.647481	0.13443	-0.287594	0.501912	0.40447	0.486462	0.955795	0.83831
	significance (two tails)	0.836932	0.922893	0.431192	0.352519	0.86557	0.712406	0.498088	0.59553	0.513538	0.0442046	0.16169
p__Firmicutes__g__Streptococcus_1078207	correlation	0.436721	0.637093	0.284051	0.0675311	0.841106	-0.387588	-0.313955	-0.391202	0.409949	0.544217	0.741009
	significance (two tails)	0.563279	0.362907	0.715949	0.932469	0.158894	0.612412	0.686045	0.608798	0.590051	0.455783	0.258991
p__Firmicutes__g__Streptococcus_1000547	correlation
	significance (two tails)
p__Firmicutes__g__Staphylococcus_4323284	correlation
	significance (two tails)
p__Firmicutes__g__Staphylococcus_1084865	correlation	-0.904313	0.17018	-0.039958	-0.636909	-0.592785	0.967737	-0.103679	0.678036	-0.879761	0.239869	0.283886
	significance (two tails)	0.0956875	0.82982	0.960042	0.363091	0.407215	0.0322628	0.896321	0.321964	0.120239	0.760131	0.716114
p__Firmicutes__g__Staphylococcus_1076316	correlation	-0.990557	-0.0942247	-0.341638	-0.815967	-0.744831	0.861098	0.202205	0.869219	-0.718186	0.382285	0.31085
	significance (two tails)	0.00944276	0.905775	0.658362	0.184033	0.255169	0.138902	0.797795	0.130781	0.281814	0.617715	0.68915
p__Firmicutes__g__Ruminococcus__s__gnavus_360015	correlation
	significance (two tails)
p__Firmicutes__g__Ruminococcus_591635	correlation	-0.415015	0.659506	0.167313	-0.517225	0.194061	0.484142	-0.31651	0.274447	-0.38088	0.698567	0.889981
	significance (two tails)	0.584985	0.340494	0.832687	0.482775	0.805939	0.515858	0.68349	0.725553	0.61912	0.301433	0.110019
p__Firmicutes__g__Ruminococcus_586271	correlation
	significance (two tails)
p__Firmicutes__g__Ruminococcus_563086	correlation	0.504885	-0.452176	0.0933612	0.695423	-0.0704517	-0.405236	0.0578059	-0.452688	0.249138	-0.854145	-0.951007
	significance (two tails)	0.495115	0.547824	0.906639	0.304577	0.929548	0.594764	0.942194	0.547312	0.750862	0.145855	0.0489929
p__Firmicutes__g__Ruminococcus_4390330	correlation
	significance (two tails)
p__Firmicutes__g__Ruminococcus_3421266	correlation
	significance (two tails)
p__Firmicutes__g__Ruminococcus_304211	correlation
	significance (two tails)
p__Firmicutes__g__Ruminococcus_199543	correlation
	significance (two tails)
p__Firmicutes__g__Roseburia_701221	correlation	0.504885	-0.452176	0.0933612	0.695423	-0.0704517	-0.405236	0.0578059	-0.452688	0.249138	-0.854145	-0.951007
	significance (two tails)	0.495115	0.547824	0.906639	0.304577	0.929548	0.594764	0.942194	0.547312	0.750862	0.145855	0.0489929
p__Firmicutes__g__Roseburia_508968	correlation	0.504885	-0.452176	0.0933612	0.695423	-0.0704517	-0.405236	0.0578059	-0.452688	0.249138	-0.854145	-0.951007
	significance (two tails)	0.495115	0.547824	0.906639	0.304577	0.929548	0.594764	0.942194	0.547312	0.750862	0.145855	0.0489929
p__Firmicutes__g__Robinsoniella__s__peoriensis_4325509	correlation
	significance (two tails)
p__Firmicutes__g__Pseudoramibacter_Eubacterium_191975	correlation
	significance (two tails)
p__Firmicutes__g__Phascolarctobacterium_556835	correlation	0.715011	-0.475347	-0.279087	0.41551	0.32098	-0.962715	0.41986	-0.409125	0.930831	-0.143403	-0.314433
	significance (two tails)	0.284989	0.524653	0.720913	0.58449	0.67902	0.0372853	0.58014	0.590875	0.0691692	0.856597	0.685567
p__Firmicutes__g__Phascolarctobacterium_3138798	correlation	0.512169	-0.715037	-0.452228	0.297944	0.0121632	-0.829848	0.592505	-0.200071	0.815504	-0.224621	-0.481012
	significance (two tails)	0.487831	0.284963	0.547772	0.702056	0.987837	0.170152	0.407495	0.799929	0.184496	0.775379	0.518988
p__Firmicutes__g__Phascolarctobacterium_275237	correlation
	significance (two tails)
p__Firmicutes__g__Oscillospira_533847	correlation
	significance (two tails)
p__Firmicutes__g__Oscillospira_367176	correlation
	significance (two tails)
p__Firmicutes__g__Oscillospira_199422	correlation
	significance (two tails)
p__Firmicutes__g__Megasphaera_817140	correlation
	significance (two tails)
p__Firmicutes__g__Megasphaera_539819	correlation
	significance (two tails)
p__Firmicutes__g__Megasphaera_4296242	correlation
	significance (two tails)
p__Firmicutes__g__Megasphaera_264967	correlation
	significance (two tails)
p__Firmicutes__g__Megamonas_325808	correlation	-0.112121	0.0818393	-0.432184	-0.589036	0.252857	-0.261036	0.357864	0.313543	0.44343	0.956751	0.900731
	significance (two tails)	0.887879	0.918161	0.567816	0.410964	0.747143	0.738964	0.642136	0.686457	0.55657	0.043249	0.0992689
p__Firmicutes__g__Leuconostoc_540940	correlation
	significance (two tails)
p__Firmicutes__g__Lactobacillus__s__zeae_73609	correlation	0.0709452	0.573612	0.847363	0.538435	0.108746	0.530953	-0.849857	-0.433377	-0.716892	-0.697552	-0.411442
	significance (two tails)	0.929055	0.426388	0.152637	0.461565	0.891254	0.469047	0.150143	0.566623	0.283108	0.302448	0.588558
p__Firmicutes__g__Lactobacillus__s__reuteri_411486	correlation	0.823806	0.718979	0.86198	0.837454	0.90095	-0.350089	-0.797816	-0.958365	0.162687	-0.392939	-0.0785454
	significance (two tails)	0.176194	0.281021	0.13802	0.162546	0.0990498	0.649911	0.202184	0.0416349	0.837313	0.607061	0.921455
p__Firmicutes__g__Lactobacillus_588197	correlation	0.823806	0.718979	0.86198	0.837454	0.90095	-0.350089	-0.797816	-0.958365	0.162687	-0.392939	-0.0785454
	significance (two tails)	0.176194	0.281021	0.13802	0.162546	0.0990498	0.649911	0.202184	0.0416349	0.837313	0.607061	0.921455
p__Firmicutes__g__Lactobacillus_354905	correlation	0.903011	0.472131	0.467443	0.63002	0.968333	-0.730232	-0.392158	-0.83386	0.629665	-0.0208724	0.163793
	significance (two tails)	0.0969888	0.527869	0.532557	0.36998	0.031667	0.269768	0.607842	0.16614	0.370335	0.979128	0.836207
p__Firmicutes__g__Lactobacillus_292057	correlation	-0.623403	0.612872	0.246083	-0.505069	-0.0830997	0.800757	-0.40373	0.375835	-0.729115	0.443326	0.640108
	significance (two tails)	0.376597	0.387128	0.753917	0.494931	0.9169	0.199243	0.59627	0.624165	0.270885	0.556674	0.359892
p__Firmicutes__g__Lactobacillus_202131	correlation
	significance (two tails)
p__Firmicutes__g__Lactobacillus_1995182	correlation	0.876272	0.379207	0.334324	0.539422	0.934853	-0.795176	-0.260031	-0.755041	0.723783	0.082143	0.221377
	significance (two tails)	0.123728	0.620793	0.665676	0.460578	0.0651469	0.204824	0.739969	0.244959	0.276217	0.917857	0.778623
p__Firmicutes__g__Epulopiscium_298247	correlation	0.823806	0.718979	0.86198	0.837454	0.90095	-0.350089	-0.797816	-0.958365	0.162687	-0.392939	-0.0785454
	significance (two tails)	0.176194	0.281021	0.13802	0.162546	0.0990498	0.649911	0.202184	0.0416349	0.837313	0.607061	0.921455
p__Firmicutes__g__Enterococcus_766768	correlation	-0.71308	0.366563	0.288764	-0.32404	-0.434119	0.991317	-0.408968	0.391429	-0.987673	-0.0525294	0.0943352
	significance (two tails)	0.28692	0.633437	0.711236	0.67596	0.565881	0.00868342	0.591032	0.608571	0.012327	0.947471	0.905665
p__Firmicutes__g__Enterococcus_590982	correlation	-0.187851	0.662247	0.77042	0.255457	0.0197691	0.743153	-0.828118	-0.200977	-0.870698	-0.436825	-0.140265
	significance (two tails)	0.812149	0.337753	0.22958	0.744543	0.980231	0.256847	0.171882	0.799023	0.129302	0.563175	0.859735
p__Firmicutes__g__Enterococcus_4316928	correlation
	significance (two tails)
p__Firmicutes__g__Enterococcus_295146	correlation	-0.470319	0.0193151	0.290633	0.0588604	-0.571106	0.786184	-0.319724	0.182784	-0.871063	-0.591604	-0.529824
	significance (two tails)	0.529681	0.980685	0.709367	0.94114	0.428894	0.213816	0.680276	0.817216	0.128937	0.408396	0.470176
p__Firmicutes__g__Enterococcus_1111582	correlation	-0.644581	-0.360794	-0.806446	-0.947308	-0.421075	0.118403	0.706315	0.839731	0.122582	0.892331	0.670849
	significance (two tails)	0.355419	0.639206	0.193554	0.0526917	0.578925	0.881597	0.293685	0.160269	0.877418	0.107669	0.329151
p__Firmicutes__g__Dorea__s__formicigenerans_1076587	correlation
	significance (two tails)
p__Firmicutes__g__Dorea_659361	correlation	-0.321052	-0.690441	-0.955772	-0.70023	-0.376096	-0.313418	0.937196	0.654775	0.522586	0.685255	0.355054
	significance (two tails)	0.678948	0.309559	0.0442276	0.29977	0.623904	0.686582	0.0628037	0.345225	0.477414	0.314745	0.644946
p__Firmicutes__g__Dorea_4383093	correlation
	significance (two tails)
p__Firmicutes__g__Dorea_364175	correlation
	significance (two tails)
p__Firmicutes__g__Dialister_246930	correlation
	significance (two tails)
p__Firmicutes__g__Dialister_128382	correlation	-0.83223	-0.431629	-0.338655	-0.482814	-0.946223	0.751747	0.278516	0.720723	-0.692298	-0.153642	-0.306627
	significance (two tails)	0.16777	0.568371	0.661345	0.517186	0.053777	0.248253	0.721484	0.279277	0.307702	0.846358	0.693373
p__Firmicutes__g__Clostridium__s__perfringens_828483	correlation
	significance (two tails)
p__Firmicutes__g__Clostridium__s__perfringens_315982	correlation
	significance (two tails)
p__Firmicutes__g__Clostridium__s__perfringens_304779	correlation	0.504885	-0.452176	0.0933612	0.695423	-0.0704517	-0.405236	0.0578059	-0.452688	0.249138	-0.854145	-0.951007
	significance (two tails)	0.495115	0.547824	0.906639	0.304577	0.929548	0.594764	0.942194	0.547312	0.750862	0.145855	0.0489929
p__Firmicutes__g__Clostridium__s__neonatale_523589	correlation
	significance (two tails)
p__Firmicutes__g__Clostridium__s__difficile_606927	correlation	0.823806	0.718979	0.86198	0.837454	0.90095	-0.350089	-0.797816	-0.958365	0.162687	-0.392939	-0.0785454
	significance (two tails)	0.176194	0.281021	0.13802	0.162546	0.0990498	0.649911	0.202184	0.0416349	0.837313	0.607061	0.921455
p__Firmicutes__g__Clostridium__s__butyricum_541328	correlation
	significance (two tails)
p__Firmicutes__g__Clostridium__s__butyricum_238205	correlation
	significance (two tails)
p__Firmicutes__g__Clostridium_329073	correlation
	significance (two tails)
p__Firmicutes__g__Clostridium_2670715	correlation
	significance (two tails)
p__Firmicutes__g__Clostridium_193894	correlation
	significance (two tails)
p__Firmicutes__g__Butyricicoccus__s__pullicaecorum_1132942	correlation
	significance (two tails)
p__Firmicutes__g__Blautia__s__producta_696563	correlation
	significance (two tails)
p__Firmicutes__g__Blautia__s__producta_589313	correlation
	significance (two tails)
p__Firmicutes__g__Blautia__s__producta_587269	correlation
	significance (two tails)
p__Firmicutes__g__Blautia__s__producta_348362	correlation
	significance (two tails)
p__Firmicutes__g__Blautia_583089	correlation
	significance (two tails)
p__Firmicutes__g__Bacillus__s__flexus_656443	correlation
	significance (two tails)
p__Firmicutes__g__Bacillus_574051	correlation
	significance (two tails)
p__Firmicutes__g__Anaerotruncus_311961	correlation
	significance (two tails)
p__Firmicutes__f__Ruminococcaceae_580521	correlation
	significance (two tails)
p__Firmicutes__f__Ruminococcaceae_554303	correlation
	significance (two tails)
p__Firmicutes__f__Ruminococcaceae_510295	correlation
	significance (two tails)
p__Firmicutes__f__Ruminococcaceae_367213	correlation
	significance (two tails)
p__Firmicutes__f__Ruminococcaceae_359175	correlation
	significance (two tails)
p__Firmicutes__f__Ruminococcaceae_350036	correlation
	significance (two tails)
p__Firmicutes__f__Ruminococcaceae_341724	correlation
	significance (two tails)
p__Firmicutes__f__Ruminococcaceae_309720	correlation
	significance (two tails)
p__Firmicutes__f__Ruminococcaceae_29495	correlation
	significance (two tails)
p__Firmicutes__f__Planococcaceae_934488	correlation	-0.738815	-0.0275381	0.0771461	-0.278349	-0.719163	0.919733	-0.15319	0.479331	-0.926056	-0.288478	-0.272609
	significance (two tails)	0.261185	0.972462	0.922854	0.721651	0.280837	0.0802668	0.84681	0.520669	0.0739442	0.711522	0.727391
p__Firmicutes__f__Lachnospiraceae_583974	correlation
	significance (two tails)
p__Firmicutes__f__Lachnospiraceae_535601	correlation
	significance (two tails)
p__Firmicutes__f__Lachnospiraceae_357312	correlation
	significance (two tails)
p__Firmicutes__f__Lachnospiraceae_338992	correlation
	significance (two tails)
p__Firmicutes__f__Lachnospiraceae_2056188	correlation
	significance (two tails)
p__Firmicutes__f__Gemellaceae_858896	correlation	-0.651811	-0.225965	-0.714543	-0.949995	-0.349652	0.178108	0.599456	0.810809	0.0597	0.933213	0.760201
	significance (two tails)	0.348189	0.774035	0.285457	0.050005	0.650348	0.821892	0.400544	0.189191	0.9403	0.0667871	0.239799
p__Firmicutes__f__Erysipelotrichaceae_592616	correlation
	significance (two tails)
p__Firmicutes__f__Erysipelotrichaceae_580008	correlation
	significance (two tails)
p__Firmicutes__f__Erysipelotrichaceae_364722	correlation
	significance (two tails)
p__Firmicutes__f__Erysipelotrichaceae_145801	correlation	0.728166	-0.0143036	0.50633	0.939239	0.305298	-0.395644	-0.361687	-0.78094	0.177466	-0.911861	-0.833871
	significance (two tails)	0.271834	0.985696	0.49367	0.0607613	0.694702	0.604356	0.638313	0.21906	0.822534	0.0881386	0.166129
p__Firmicutes__f__Clostridiaceae_551822	correlation
	significance (two tails)
p__Firmicutes__f__Clostridiaceae_359750	correlation	-0.305074	0.7903	0.35643	-0.350356	0.303093	0.494116	-0.495315	0.11146	-0.435341	0.559391	0.814211
	significance (two tails)	0.694926	0.2097	0.64357	0.649644	0.696907	0.505884	0.504685	0.88854	0.564659	0.440609	0.185789
p__Firmicutes__f__Clostridiaceae_338222	correlation	-0.321052	-0.690441	-0.955772	-0.70023	-0.376096	-0.313418	0.937196	0.654775	0.522586	0.685255	0.355054
	significance (two tails)	0.678948	0.309559	0.0442276	0.29977	0.623904	0.686582	0.0628037	0.345225	0.477414	0.314745	0.644946
p__Firmicutes__f__Clostridiaceae_325419	correlation	-0.321052	-0.690441	-0.955772	-0.70023	-0.376096	-0.313418	0.937196	0.654775	0.522586	0.685255	0.355054
	significance (two tails)	0.678948	0.309559	0.0442276	0.29977	0.623904	0.686582	0.0628037	0.345225	0.477414	0.314745	0.644946
p__Firmicutes__f__Clostridiaceae_303809	correlation	0.656566	-0.220489	-0.289429	0.18672	0.531402	-0.957237	0.376823	-0.335977	0.989034	0.284869	0.17328
	significance (two tails)	0.343434	0.779511	0.710571	0.81328	0.468598	0.0427626	0.623177	0.664023	0.0109657	0.715131	0.82672
p__Firmicutes__f__Clostridiaceae_2225203	correlation
	significance (two tails)
p__Firmicutes__f__Clostridiaceae_171681	correlation	0.811514	0.0304728	0.518951	0.963255	0.41485	-0.489617	-0.370839	-0.841836	0.2737	-0.852679	-0.762783
	significance (two tails)	0.188486	0.969527	0.481049	0.0367453	0.58515	0.510383	0.629161	0.158164	0.7263	0.147321	0.237217
p__Firmicutes__f__Clostridiaceae_171184	correlation	0.504885	-0.452176	0.0933612	0.695423	-0.0704517	-0.405236	0.0578059	-0.452688	0.249138	-0.854145	-0.951007
	significance (two tails)	0.495115	0.547824	0.906639	0.304577	0.929548	0.594764	0.942194	0.547312	0.750862	0.145855	0.0489929
p__Firmicutes__f__Clostridiaceae_1625448	correlation
	significance (two tails)
p__Firmicutes__f__Clostridiaceae_1104963	correlation	-0.83223	-0.431629	-0.338655	-0.482814	-0.946223	0.751747	0.278516	0.720723	-0.692298	-0.153642	-0.306627
	significance (two tails)	0.16777	0.568371	0.661345	0.517186	0.053777	0.248253	0.721484	0.279277	0.307702	0.846358	0.693373
p__Firmicutes__f__Bacillaceae_551871	correlation
	significance (two tails)
p__Cyanobacteria__o__Streptophyta_1793401	correlation
	significance (two tails)
p__Cyanobacteria__o__Streptophyta_153978	correlation
	significance (two tails)
p__Cyanobacteria__o__Streptophyta_1141758	correlation
	significance (two tails)
p__Bacteroidetes__g__Sphingobacterium__s__mizutaii_537775	correlation
	significance (two tails)
p__Bacteroidetes__g__Prevotella__s__stercorea_347138	correlation
	significance (two tails)
p__Bacteroidetes__g__Prevotella__s__copri_568118	correlation
	significance (two tails)
p__Bacteroidetes__g__Prevotella__s__copri_545061	correlation
	significance (two tails)
p__Bacteroidetes__g__Prevotella__s__copri_336372	correlation
	significance (two tails)
p__Bacteroidetes__g__Prevotella__s__copri_326482	correlation	0.496098	0.953174	0.923026	0.562168	0.811742	0.0301036	-0.933437	-0.734229	-0.17451	-0.170993	0.213788
	significance (two tails)	0.503902	0.0468262	0.0769743	0.437832	0.188258	0.969896	0.0665626	0.265771	0.82549	0.829007	0.786212
p__Bacteroidetes__g__Prevotella__s__copri_174831	correlation
	significance (two tails)
p__Bacteroidetes__g__Parabacteroides__s__distasonis_585914	correlation	0.451626	0.228196	-0.109122	-0.0526533	0.68954	-0.659321	0.111474	-0.238732	0.73385	0.641154	0.670693
	significance (two tails)	0.548374	0.771804	0.890878	0.947347	0.31046	0.340679	0.888526	0.761268	0.26615	0.358846	0.329307
p__Bacteroidetes__g__Parabacteroides__s__distasonis_578016	correlation	-0.366458	0.0392265	-0.50682	-0.770758	0.0350557	-0.0248494	0.401367	0.527982	0.234943	0.99951	0.923094
	significance (two tails)	0.633542	0.960774	0.49318	0.229242	0.964944	0.975151	0.598633	0.472018	0.765057	0.000490147	0.0769058
p__Bacteroidetes__g__Parabacteroides__s__distasonis_577294	correlation	0.0859902	-0.0997622	-0.51675	-0.445134	0.296387	-0.523715	0.489511	0.198795	0.688668	0.849666	0.73311
	significance (two tails)	0.91401	0.900238	0.48325	0.554866	0.703613	0.476285	0.510489	0.801205	0.311332	0.150334	0.26689
p__Bacteroidetes__g__Parabacteroides__s__distasonis_564140	correlation	0.532269	0.654277	0.354878	0.181551	0.897503	-0.439656	-0.368715	-0.493992	0.436077	0.447149	0.659485
	significance (two tails)	0.467731	0.345723	0.645122	0.818449	0.102497	0.560344	0.631285	0.506008	0.563923	0.552851	0.340515
p__Bacteroidetes__g__Parabacteroides__s__distasonis_4365130	correlation	-0.287708	0.15743	-0.396741	-0.696899	0.153457	-0.0446628	0.291607	0.427036	0.237806	0.988998	0.959317
	significance (two tails)	0.712292	0.84257	0.603259	0.303101	0.846543	0.955337	0.708393	0.572964	0.762194	0.0110018	0.0406829
p__Bacteroidetes__g__Parabacteroides__s__distasonis_291090	correlation	0.475755	0.808214	0.523016	0.222354	0.897708	-0.261612	-0.552987	-0.525905	0.232921	0.365183	0.644661
	significance (two tails)	0.524245	0.191786	0.476984	0.777646	0.102292	0.738388	0.447013	0.474095	0.767079	0.634817	0.355339
p__Bacteroidetes__g__Parabacteroides__s__distasonis_2497335	correlation	0.0712158	0.590952	0.10001	-0.288362	0.590941	-0.117509	-0.185552	-0.0413597	0.211441	0.779089	0.936515
	significance (two tails)	0.928784	0.409048	0.89999	0.711638	0.409059	0.882491	0.814448	0.95864	0.788559	0.220911	0.0634849
p__Bacteroidetes__g__Parabacteroides__s__distasonis_2309802	correlation
	significance (two tails)
p__Bacteroidetes__g__Parabacteroides__s__distasonis_198190	correlation
	significance (two tails)
p__Bacteroidetes__g__Parabacteroides__s__distasonis_186233	correlation	0.603389	-0.0510099	-0.230661	0.0986805	0.618052	-0.88056	0.287858	-0.311505	0.931014	0.440628	0.380401
	significance (two tails)	0.396611	0.94899	0.769339	0.901319	0.381948	0.11944	0.712142	0.688495	0.0689855	0.559372	0.619599
p__Bacteroidetes__g__Parabacteroides__s__distasonis_174842	correlation	-0.136809	0.689116	0.184689	-0.375969	0.45525	0.173876	-0.303695	0.0716928	-0.0810263	0.748606	0.94687
	significance (two tails)	0.863191	0.310884	0.815311	0.624031	0.54475	0.826124	0.696305	0.928307	0.918974	0.251394	0.0531305
p__Bacteroidetes__g__Parabacteroides_198866	correlation	0.610822	0.833864	0.658425	0.420978	0.956853	-0.305063	-0.662145	-0.689501	0.226981	0.1618	0.469846
	significance (two tails)	0.389178	0.166136	0.341575	0.579022	0.0431467	0.694937	0.337855	0.310499	0.773019	0.8382	0.530154
p__Bacteroidetes__g__Parabacteroides_180082	correlation
	significance (two tails)
p__Bacteroidetes__g__Myroides__s__odoratimimus_579933	correlation
	significance (two tails)
p__Bacteroidetes__g__Dysgonomonas_606755	correlation
	significance (two tails)
p__Bacteroidetes__g__Dysgonomonas_364538	correlation
	significance (two tails)
p__Bacteroidetes__g__Butyricimonas_208479	correlation	-0.256615	-0.343966	0.0930242	0.221172	-0.625432	0.445651	-0.0530182	0.0972316	-0.547901	-0.773951	-0.836171
	significance (two tails)	0.743385	0.656034	0.906976	0.778828	0.374568	0.554349	0.946982	0.902768	0.452099	0.226049	0.163829
p__Bacteroidetes__g__Bacteroides__s__uniformis_589071	correlation	-0.076741	-0.256433	-0.673828	-0.585426	0.0955647	-0.440155	0.637927	0.379696	0.633944	0.877829	0.698031
	significance (two tails)	0.923259	0.743567	0.326172	0.414574	0.904435	0.559845	0.362073	0.620304	0.366056	0.122171	0.301969
p__Bacteroidetes__g__Bacteroides__s__uniformis_572476	correlation	0.747989	0.160719	0.0260199	0.297639	0.796226	-0.86879	0.0385467	-0.525908	0.866774	0.306933	0.34095
	significance (two tails)	0.252011	0.839281	0.97398	0.702361	0.203774	0.13121	0.961453	0.474092	0.133226	0.693067	0.65905
p__Bacteroidetes__g__Bacteroides__s__uniformis_350277	correlation	0.0843481	-0.645827	-0.816196	-0.370995	-0.0650591	-0.667295	0.853585	0.299788	0.819433	0.539141	0.239571
	significance (two tails)	0.915652	0.354173	0.183804	0.629005	0.934941	0.332705	0.146415	0.700212	0.180567	0.460859	0.760429
p__Bacteroidetes__g__Bacteroides__s__uniformis_197072	correlation	0.167531	0.512645	0.0420712	-0.244066	0.632548	-0.261789	-0.108296	-0.0873223	0.355711	0.775916	0.903294
	significance (two tails)	0.832469	0.487355	0.957929	0.755934	0.367452	0.738211	0.891704	0.912678	0.644289	0.224084	0.0967056
p__Bacteroidetes__g__Bacteroides__s__plebeius_365496	correlation
	significance (two tails)
p__Bacteroidetes__g__Bacteroides__s__plebeius_340476	correlation	-0.189774	-0.165223	-0.638964	-0.673	0.0666443	-0.299265	0.576967	0.450873	0.505144	0.944637	0.794051
	significance (two tails)	0.810226	0.834777	0.361036	0.327	0.933356	0.700735	0.423033	0.549127	0.494856	0.0553632	0.205949
p__Bacteroidetes__g__Bacteroides__s__plebeius_187388	correlation
	significance (two tails)
p__Bacteroidetes__g__Bacteroides__s__ovatus_535375	correlation	0.13483	0.437031	-0.0453205	-0.300652	0.582759	-0.28403	-0.0207918	-0.0263805	0.394384	0.817786	0.912044
	significance (two tails)	0.86517	0.562969	0.95468	0.699348	0.417241	0.71597	0.979208	0.97362	0.605616	0.182214	0.0879558
p__Bacteroidetes__g__Bacteroides__s__ovatus_308598	correlation	-0.0209292	0.627075	0.122061	-0.338601	0.533086	-0.000251056	-0.222775	0.0160292	0.0977481	0.78354	0.954559
	significance (two tails)	0.979071	0.372925	0.877939	0.661399	0.466914	0.999749	0.777225	0.983971	0.902252	0.21646	0.0454414
p__Bacteroidetes__g__Bacteroides__s__ovatus_187443	correlation	-0.709976	0.237506	-0.287621	-0.855545	-0.20217	0.5173	0.128987	0.676958	-0.330121	0.854374	0.868098
	significance (two tails)	0.290024	0.762494	0.712379	0.144455	0.79783	0.4827	0.871013	0.323042	0.669879	0.145626	0.131902
p__Bacteroidetes__g__Bacteroides__s__fragilis_4386507	correlation	-0.623403	0.612872	0.246083	-0.505069	-0.0830997	0.800757	-0.40373	0.375835	-0.729115	0.443326	0.640108
	significance (two tails)	0.376597	0.387128	0.753917	0.494931	0.9169	0.199243	0.59627	0.624165	0.270885	0.556674	0.359892
p__Bacteroidetes__g__Bacteroides__s__fragilis_351231	correlation	-0.514676	0.605386	0.52366	-0.140856	-0.168429	0.916982	-0.637139	0.153164	-0.953707	-0.0929684	0.150076
	significance (two tails)	0.485324	0.394614	0.47634	0.859144	0.831571	0.0830176	0.362861	0.846836	0.0462926	0.907032	0.849924
p__Bacteroidetes__g__Bacteroides__s__fragilis_3474081	correlation
	significance (two tails)
p__Bacteroidetes__g__Bacteroides__s__fragilis_2200896	correlation
	significance (two tails)
p__Bacteroidetes__g__Bacteroides__s__fragilis_183603	correlation
	significance (two tails)
p__Bacteroidetes__g__Bacteroides__s__eggerthii_192111	correlation
	significance (two tails)
p__Bacteroidetes__g__Bacteroides__s__coprophilus_522595	correlation	-0.61968	0.0200545	0.199054	-0.118807	-0.643557	0.878382	-0.256109	0.336328	-0.923538	-0.431938	-0.384495
	significance (two tails)	0.38032	0.979945	0.800946	0.881193	0.356443	0.121618	0.743891	0.663672	0.0764624	0.568062	0.615505
p__Bacteroidetes__g__Bacteroides__s__coprophilus_2730944	correlation	-0.61968	0.0200545	0.199054	-0.118807	-0.643557	0.878382	-0.256109	0.336328	-0.923538	-0.431938	-0.384495
	significance (two tails)	0.38032	0.979945	0.800946	0.881193	0.356443	0.121618	0.743891	0.663672	0.0764624	0.568062	0.615505
p__Bacteroidetes__g__Bacteroides__s__caccae_187324	correlation	-0.725147	0.283172	0.253015	-0.307964	-0.505817	0.991554	-0.363708	0.409996	-0.993099	-0.120798	3.10444e-05
	significance (two tails)	0.274853	0.716828	0.746985	0.692036	0.494183	0.00844614	0.636292	0.590004	0.00690115	0.879202	0.999969
p__Bacteroidetes__g__Bacteroides_589277	correlation	-0.17449	0.604004	0.0748786	-0.45258	0.40556	0.139973	-0.195088	0.146883	-0.0243692	0.817798	0.976758
	significance (two tails)	0.82551	0.395996	0.925121	0.54742	0.59444	0.860027	0.804912	0.853117	0.975631	0.182202	0.0232423
p__Bacteroidetes__g__Bacteroides_583117	correlation	0.837576	-0.321162	-0.080844	0.581673	0.458732	-0.964183	0.23028	-0.583383	0.889245	-0.260507	-0.361098
	significance (two tails)	0.162424	0.678838	0.919156	0.418327	0.541268	0.0358172	0.76972	0.416617	0.110755	0.739493	0.638902
p__Bacteroidetes__g__Bacteroides_580629	correlation
	significance (two tails)
p__Bacteroidetes__g__Bacteroides_577170	correlation	0.0618741	0.568948	0.0731198	-0.306328	0.577511	-0.12544	-0.158764	-0.0229865	0.224686	0.794123	0.94165
	significance (two tails)	0.938126	0.431052	0.92688	0.693672	0.422489	0.87456	0.841236	0.977013	0.775314	0.205877	0.0583505
p__Bacteroidetes__g__Bacteroides_572010	correlation
	significance (two tails)
p__Bacteroidetes__g__Bacteroides_560336	correlation	0.966514	-0.0289578	0.239156	0.782376	0.664388	-0.89646	-0.0917414	-0.811448	0.764465	-0.387652	-0.363431
	significance (two tails)	0.0334855	0.971042	0.760844	0.217624	0.335612	0.10354	0.908259	0.188552	0.235535	0.612348	0.636569
p__Bacteroidetes__g__Bacteroides_550814	correlation	0.286805	0.318206	-0.104887	-0.199534	0.633343	-0.485192	0.0718258	-0.115055	0.584839	0.758769	0.812401
	significance (two tails)	0.713195	0.681794	0.895113	0.800466	0.366657	0.514808	0.928174	0.884945	0.415161	0.241231	0.187599
p__Bacteroidetes__g__Bacteroides_538296	correlation
	significance (two tails)
p__Bacteroidetes__g__Bacteroides_513445	correlation	0.0602071	0.574432	0.0788086	-0.305023	0.578008	-0.119754	-0.165018	-0.024211	0.218203	0.791831	0.941692
	significance (two tails)	0.939793	0.425568	0.921191	0.694977	0.421992	0.880246	0.834982	0.975789	0.781797	0.208169	0.0583079
p__Bacteroidetes__g__Bacteroides_4457872	correlation	0.715011	-0.475347	-0.279087	0.41551	0.32098	-0.962715	0.41986	-0.409125	0.930831	-0.143403	-0.314433
	significance (two tails)	0.284989	0.524653	0.720913	0.58449	0.67902	0.0372853	0.58014	0.590875	0.0691692	0.856597	0.685567
p__Bacteroidetes__g__Bacteroides_4455163	correlation	-0.623403	0.612872	0.246083	-0.505069	-0.0830997	0.800757	-0.40373	0.375835	-0.729115	0.443326	0.640108
	significance (two tails)	0.376597	0.387128	0.753917	0.494931	0.9169	0.199243	0.59627	0.624165	0.270885	0.556674	0.359892
p__Bacteroidetes__g__Bacteroides_4369878	correlation	-0.119202	0.581331	0.0534937	-0.430586	0.444344	0.0627912	-0.165295	0.116605	0.0534593	0.829301	0.978418
	significance (two tails)	0.880798	0.418669	0.946506	0.569414	0.555656	0.937209	0.834705	0.883395	0.946541	0.170699	0.021582
p__Bacteroidetes__g__Bacteroides_4357712	correlation	-0.382045	0.656792	0.154711	-0.511886	0.227905	0.436013	-0.300795	0.257433	-0.329977	0.722761	0.910903
	significance (two tails)	0.617955	0.343208	0.845289	0.488114	0.772095	0.563987	0.699205	0.742567	0.670023	0.277239	0.0890971
p__Bacteroidetes__g__Bacteroides_4029632	correlation	-0.623403	0.612872	0.246083	-0.505069	-0.0830997	0.800757	-0.40373	0.375835	-0.729115	0.443326	0.640108
	significance (two tails)	0.376597	0.387128	0.753917	0.494931	0.9169	0.199243	0.59627	0.624165	0.270885	0.556674	0.359892
p__Bacteroidetes__g__Bacteroides_4015273	correlation
	significance (two tails)
p__Bacteroidetes__g__Bacteroides_364926	correlation
	significance (two tails)
p__Bacteroidetes__g__Bacteroides_364903	correlation
	significance (two tails)
p__Bacteroidetes__g__Bacteroides_364029	correlation	-0.341447	0.704543	0.218383	-0.456577	0.271451	0.434493	-0.361222	0.200409	-0.342734	0.682417	0.892747
	significance (two tails)	0.658553	0.295457	0.781617	0.543423	0.728549	0.565507	0.638778	0.799591	0.657266	0.317583	0.107253
p__Bacteroidetes__g__Bacteroides_359538	correlation
	significance (two tails)
p__Bacteroidetes__g__Bacteroides_357582	correlation	-0.590449	-0.0770414	0.149938	-0.0858367	-0.684672	0.822546	-0.191496	0.331251	-0.872639	-0.491394	-0.476108
	significance (two tails)	0.409551	0.922959	0.850062	0.914163	0.315328	0.177454	0.808504	0.668749	0.127361	0.508606	0.523892
p__Bacteroidetes__g__Bacteroides_356827	correlation
	significance (two tails)
p__Bacteroidetes__g__Bacteroides_356052	correlation
	significance (two tails)
p__Bacteroidetes__g__Bacteroides_352825	correlation
	significance (two tails)
p__Bacteroidetes__g__Bacteroides_348304	correlation	-0.460688	0.659928	0.184725	-0.52222	0.14387	0.551463	-0.337646	0.297694	-0.452779	0.659699	0.854846
	significance (two tails)	0.539312	0.340072	0.815275	0.47778	0.85613	0.448537	0.662354	0.702306	0.547221	0.340301	0.145154
p__Bacteroidetes__g__Bacteroides_3472078	correlation	-0.623403	0.612872	0.246083	-0.505069	-0.0830997	0.800757	-0.40373	0.375835	-0.729115	0.443326	0.640108
	significance (two tails)	0.376597	0.387128	0.753917	0.494931	0.9169	0.199243	0.59627	0.624165	0.270885	0.556674	0.359892
p__Bacteroidetes__g__Bacteroides_339013	correlation	0.715011	-0.475347	-0.279087	0.41551	0.32098	-0.962715	0.41986	-0.409125	0.930831	-0.143403	-0.314433
	significance (two tails)	0.284989	0.524653	0.720913	0.58449	0.67902	0.0372853	0.58014	0.590875	0.0691692	0.856597	0.685567
p__Bacteroidetes__g__Bacteroides_327050	correlation
	significance (two tails)
p__Bacteroidetes__g__Bacteroides_3154070	correlation	0.308994	0.4211	0.000708392	-0.148603	0.689942	-0.440827	-0.038042	-0.175245	0.523892	0.724774	0.821371
	significance (two tails)	0.691006	0.5789	0.999292	0.851397	0.310058	0.559173	0.961958	0.824755	0.476108	0.275226	0.178629
p__Bacteroidetes__g__Bacteroides_313764	correlation	0.4035	0.206768	-0.150906	-0.107354	0.652156	-0.635726	0.146777	-0.18509	0.722688	0.681052	0.698638
	significance (two tails)	0.5965	0.793232	0.849094	0.892646	0.347844	0.364274	0.853223	0.81491	0.277312	0.318948	0.301362
p__Bacteroidetes__g__Bacteroides_312140	correlation	-0.0513245	0.626037	0.115705	-0.360504	0.509519	0.0293486	-0.220585	0.0407373	0.0714287	0.790295	0.960296
	significance (two tails)	0.948675	0.373963	0.884295	0.639496	0.490481	0.970651	0.779415	0.959263	0.928571	0.209705	0.0397042
p__Bacteroidetes__g__Bacteroides_305946	correlation	0.501703	0.394579	0.0654117	0.0411766	0.79108	-0.600605	-0.0678502	-0.348076	0.646376	0.580662	0.68018
	significance (two tails)	0.498297	0.605421	0.934588	0.958823	0.20892	0.399395	0.93215	0.651924	0.353624	0.419338	0.31982
p__Bacteroidetes__g__Bacteroides_297057	correlation
	significance (two tails)
p__Bacteroidetes__g__Bacteroides_2740953	correlation
	significance (two tails)
p__Bacteroidetes__g__Bacteroides_270094	correlation	-0.623403	0.612872	0.246083	-0.505069	-0.0830997	0.800757	-0.40373	0.375835	-0.729115	0.443326	0.640108
	significance (two tails)	0.376597	0.387128	0.753917	0.494931	0.9169	0.199243	0.59627	0.624165	0.270885	0.556674	0.359892
p__Bacteroidetes__g__Bacteroides_2563561	correlation	0.459374	0.616866	0.272293	0.0813143	0.84792	-0.419536	-0.297132	-0.403176	0.440797	0.536899	0.726525
	significance (two tails)	0.540626	0.383134	0.727707	0.918686	0.15208	0.580464	0.702868	0.596824	0.559203	0.463101	0.273475
p__Bacteroidetes__g__Bacteroides_2189140	correlation
	significance (two tails)
p__Bacteroidetes__g__Bacteroides_209685	correlation
	significance (two tails)
p__Bacteroidetes__g__Bacteroides_2061739	correlation	0.622481	-0.0838208	-0.238392	0.124253	0.606674	-0.902351	0.302888	-0.324368	0.947509	0.404527	0.334901
	significance (two tails)	0.377519	0.916179	0.761608	0.875747	0.393326	0.0976488	0.697112	0.675632	0.0524908	0.595473	0.665099
p__Bacteroidetes__g__Bacteroides_205904	correlation	0.254853	0.448795	0.00690002	-0.190245	0.666625	-0.379102	-0.0550202	-0.13732	0.468221	0.751052	0.855972
	significance (two tails)	0.745147	0.551205	0.9931	0.809755	0.333375	0.620898	0.94498	0.86268	0.531779	0.248948	0.144028
p__Bacteroidetes__g__Bacteroides_199716	correlation	-0.623403	0.612872	0.246083	-0.505069	-0.0830997	0.800757	-0.40373	0.375835	-0.729115	0.443326	0.640108
	significance (two tails)	0.376597	0.387128	0.753917	0.494931	0.9169	0.199243	0.59627	0.624165	0.270885	0.556674	0.359892
p__Bacteroidetes__g__Bacteroides_198449	correlation	0.417331	0.192126	-0.15638	-0.095397	0.652964	-0.653288	0.155932	-0.19353	0.73843	0.669542	0.682511
	significance (two tails)	0.582669	0.807874	0.84362	0.904603	0.347036	0.346712	0.844068	0.80647	0.26157	0.330458	0.317489
p__Bacteroidetes__g__Bacteroides_194909	correlation	-0.623403	0.612872	0.246083	-0.505069	-0.0830997	0.800757	-0.40373	0.375835	-0.729115	0.443326	0.640108
	significance (two tails)	0.376597	0.387128	0.753917	0.494931	0.9169	0.199243	0.59627	0.624165	0.270885	0.556674	0.359892
p__Bacteroidetes__g__Bacteroides_193591	correlation	-0.475473	0.659128	0.190349	-0.523162	0.126692	0.573439	-0.344311	0.305129	-0.476445	0.645612	0.841743
	significance (two tails)	0.524527	0.340872	0.809651	0.476838	0.873308	0.426561	0.655689	0.694871	0.523555	0.354388	0.158257
p__Bacteroidetes__g__Bacteroides_193233	correlation	0.715011	-0.475347	-0.279087	0.41551	0.32098	-0.962715	0.41986	-0.409125	0.930831	-0.143403	-0.314433
	significance (two tails)	0.284989	0.524653	0.720913	0.58449	0.67902	0.0372853	0.58014	0.590875	0.0691692	0.856597	0.685567
p__Bacteroidetes__g__Bacteroides_192839	correlation	0.201001	0.388537	-0.0712111	-0.258959	0.608	-0.372249	0.018919	-0.0646771	0.478657	0.797292	0.87464
	significance (two tails)	0.798999	0.611463	0.928789	0.741041	0.392	0.627751	0.981081	0.935323	0.521343	0.202708	0.12536
p__Bacteroidetes__g__Bacteroides_192684	correlation	0.499846	0.0967386	-0.18915	-0.0182783	0.649818	-0.756502	0.212079	-0.244651	0.82901	0.587977	0.571473
	significance (two tails)	0.500154	0.903261	0.81085	0.981722	0.350182	0.243498	0.787921	0.755349	0.17099	0.412023	0.428527
p__Bacteroidetes__g__Bacteroides_192055	correlation	0.0849309	0.608332	0.123142	-0.268827	0.605892	-0.116881	-0.207636	-0.0613416	0.205674	0.764352	0.929859
	significance (two tails)	0.915069	0.391668	0.876858	0.731173	0.394108	0.883119	0.792364	0.938658	0.794326	0.235648	0.0701407
p__Bacteroidetes__g__Bacteroides_190638	correlation	-0.623403	0.612872	0.246083	-0.505069	-0.0830997	0.800757	-0.40373	0.375835	-0.729115	0.443326	0.640108
	significance (two tails)	0.376597	0.387128	0.753917	0.494931	0.9169	0.199243	0.59627	0.624165	0.270885	0.556674	0.359892
p__Bacteroidetes__g__Bacteroides_189384	correlation	-0.623403	0.612872	0.246083	-0.505069	-0.0830997	0.800757	-0.40373	0.375835	-0.729115	0.443326	0.640108
	significance (two tails)	0.376597	0.387128	0.753917	0.494931	0.9169	0.199243	0.59627	0.624165	0.270885	0.556674	0.359892
p__Bacteroidetes__g__Bacteroides_187841	correlation	-0.340173	0.6508	0.13867	-0.503273	0.268365	0.375382	-0.280354	0.235579	-0.266387	0.749406	0.93278
	significance (two tails)	0.659827	0.3492	0.86133	0.496727	0.731635	0.624618	0.719646	0.764421	0.733613	0.250594	0.0672205
p__Bacteroidetes__g__Bacteroides_186841	correlation
	significance (two tails)
p__Bacteroidetes__g__Bacteroides_184753	correlation	-0.284976	0.639032	0.117471	-0.489136	0.317861	0.296213	-0.252673	0.206399	-0.184172	0.778322	0.95448
	significance (two tails)	0.715024	0.360968	0.882529	0.510864	0.682139	0.703787	0.747327	0.793601	0.815828	0.221678	0.0455203
p__Bacteroidetes__g__Bacteroides_183496	correlation	-0.623403	0.612872	0.246083	-0.505069	-0.0830997	0.800757	-0.40373	0.375835	-0.729115	0.443326	0.640108
	significance (two tails)	0.376597	0.387128	0.753917	0.494931	0.9169	0.199243	0.59627	0.624165	0.270885	0.556674	0.359892
p__Bacteroidetes__g__Bacteroides_183480	correlation
	significance (two tails)
p__Bacteroidetes__g__Bacteroides_182157	correlation	-0.623403	0.612872	0.246083	-0.505069	-0.0830997	0.800757	-0.40373	0.375835	-0.729115	0.443326	0.640108
	significance (two tails)	0.376597	0.387128	0.753917	0.494931	0.9169	0.199243	0.59627	0.624165	0.270885	0.556674	0.359892
p__Bacteroidetes__g__Bacteroides_175535	correlation	0.121253	-0.62278	-0.79195	-0.342401	-0.0249292	-0.693479	0.832301	0.263412	0.840456	0.534441	0.244223
	significance (two tails)	0.878747	0.37722	0.20805	0.657599	0.975071	0.306521	0.167699	0.736588	0.159544	0.465559	0.755777
p__Bacteroidetes__g__Bacteroides_175485	correlation	-0.414489	0.659477	0.167112	-0.51715	0.194616	0.483371	-0.316262	0.274176	-0.380061	0.698977	0.890343
	significance (two tails)	0.585511	0.340523	0.832888	0.48285	0.805384	0.516629	0.683738	0.725824	0.619939	0.301023	0.109657
p__Bacteroidetes__g__Bacteroides_161423	correlation
	significance (two tails)
p__Bacteroidetes__g__Bacteroides_161007	correlation	0.00656547	0.598524	0.0940507	-0.3339	0.545896	-0.0500514	-0.189379	0.00825864	0.15038	0.794757	0.953687
	significance (two tails)	0.993435	0.401476	0.905949	0.6661	0.454104	0.949949	0.810621	0.991741	0.84962	0.205243	0.0463131
p__Bacteroidetes__f__Rikenellaceae_357046	correlation	-0.551856	-0.410415	-0.108273	-0.102211	-0.823966	0.62444	0.102879	0.404294	-0.656038	-0.529812	-0.64012
	significance (two tails)	0.448144	0.589585	0.891727	0.897789	0.176034	0.37556	0.897121	0.595706	0.343962	0.470188	0.35988
p__Bacteroidetes__f__Rikenellaceae_199534	correlation
	significance (two tails)
p__Bacteroidetes__f__Cytophagaceae_555506	correlation
	significance (two tails)
p__Bacteroidetes__f__Barnesiellaceae_190975	correlation
	significance (two tails)
p__Bacteroidetes__f__Barnesiellaceae_183395	correlation
	significance (two tails)
p__Bacteroidetes__f__Barnesiellaceae_180133	correlation
	significance (two tails)
p__Actinobacteria__g__Rothia__s__mucilaginosa_903426	correlation	-0.119086	0.115884	-0.40521	-0.588272	0.264071	-0.236814	0.326897	0.307907	0.417213	0.959117	0.916066
	significance (two tails)	0.880914	0.884116	0.59479	0.411728	0.735929	0.763186	0.673103	0.692093	0.582787	0.0408828	0.0839335
p__Actinobacteria__g__Rothia__s__mucilaginosa_866280	correlation	0.0849309	0.608332	0.123142	-0.268827	0.605892	-0.116881	-0.207636	-0.0613416	0.205674	0.764352	0.929859
	significance (two tails)	0.915069	0.391668	0.876858	0.731173	0.394108	0.883119	0.792364	0.938658	0.794326	0.235648	0.0701407
p__Actinobacteria__g__Eggerthella__s__lenta_682726	correlation
	significance (two tails)
p__Actinobacteria__g__Collinsella__s__stercoris_329688	correlation
	significance (two tails)
p__Actinobacteria__g__Collinsella__s__aerofaciens_363794	correlation	0.823806	0.718979	0.86198	0.837454	0.90095	-0.350089	-0.797816	-0.958365	0.162687	-0.392939	-0.0785454
	significance (two tails)	0.176194	0.281021	0.13802	0.162546	0.0990498	0.649911	0.202184	0.0416349	0.837313	0.607061	0.921455
p__Actinobacteria__g__Bifidobacterium__s__longum_72820	correlation	-0.40081	0.658567	0.161887	-0.51509	0.208872	0.46336	-0.309783	0.267138	-0.358852	0.70936	0.89942
	significance (two tails)	0.59919	0.341433	0.838113	0.48491	0.791128	0.53664	0.690217	0.732862	0.641148	0.29064	0.10058
p__Actinobacteria__g__Bifidobacterium__s__adolescentis_370225	correlation	-0.256615	-0.343966	0.0930242	0.221172	-0.625432	0.445651	-0.0530182	0.0972316	-0.547901	-0.773951	-0.836171
	significance (two tails)	0.743385	0.656034	0.906976	0.778828	0.374568	0.554349	0.946982	0.902768	0.452099	0.226049	0.163829
p__Actinobacteria__g__Bifidobacterium__s__adolescentis_235262	correlation
	significance (two tails)
p__Actinobacteria__g__Bifidobacterium_825808	correlation	-0.623403	0.612872	0.246083	-0.505069	-0.0830997	0.800757	-0.40373	0.375835	-0.729115	0.443326	0.640108
	significance (two tails)	0.376597	0.387128	0.753917	0.494931	0.9169	0.199243	0.59627	0.624165	0.270885	0.556674	0.359892
p__Actinobacteria__g__Bifidobacterium_553611	correlation
	significance (two tails)
p__Actinobacteria__g__Bifidobacterium_132041	correlation	-0.518487	-0.949136	-0.859688	-0.507728	-0.866584	0.0493711	0.873461	0.717394	0.0734205	0.0519854	-0.320317
	significance (two tails)	0.481513	0.0508644	0.140312	0.492272	0.133416	0.950629	0.126539	0.282606	0.926579	0.948015	0.679683
p__Actinobacteria__g__Arthrobacter__s__sanguinis_1128226	correlation	0.0849309	0.608332	0.123142	-0.268827	0.605892	-0.116881	-0.207636	-0.0613416	0.205674	0.764352	0.929859
	significance (two tails)	0.915069	0.391668	0.876858	0.731173	0.394108	0.883119	0.792364	0.938658	0.794326	0.235648	0.0701407

## Sheet: c-Partial_day30
		beta_PA	C10	C12	C14	C16	C18	C18_1	C18_2	C18_3	C20_4n6	C22_6n3
beta_PA	correlation	1	0.225906	0.520195	0.206489	0.262639	0.282112	-0.132208	-0.582196	0.152099	-0.0621959	0.532031
	significance (two tails)		0.480193	0.0829644	0.519646	0.409536	0.374333	0.682108	0.0470158	0.637002	0.847727	0.0749959
C10	correlation	0.225906	1	0.0611065	0.653824	-0.188452	0.124036	-0.417267	0.124285	0.588373	0.732822	0.0471181
	significance (two tails)	0.480193		0.850367	0.0211009	0.557502	0.700932	0.177155	0.700355	0.044176	0.00670524	0.884388
C12	correlation	0.520195	0.0611065	1	0.504281	-0.161492	0.155008	0.229401	-0.608397	-0.33508	-0.19434	0.551283
	significance (two tails)	0.0829644	0.850367		0.0945588	0.616078	0.630493	0.473241	0.0358038	0.287016	0.545021	0.063182
C14	correlation	0.206489	0.653824	0.504281	1	-0.288687	0.372561	-0.0795042	-0.278838	0.235822	0.245514	0.222195
	significance (two tails)	0.519646	0.0211009	0.0945588		0.362813	0.232998	0.805985	0.380137	0.460591	0.441804	0.487624
C16	correlation	0.262639	-0.188452	-0.161492	-0.288687	1	-0.286092	-0.543074	-0.125114	-0.106474	-0.394503	0.162669
	significance (two tails)	0.409536	0.557502	0.616078	0.362813		0.367338	0.0680493	0.698438	0.741896	0.204423	0.613474
C18	correlation	0.282112	0.124036	0.155008	0.372561	-0.286092	1	0.25137	-0.155082	0.233848	0.00860831	0.122528
	significance (two tails)	0.374333	0.700932	0.630493	0.232998	0.367338		0.430636	0.63033	0.464464	0.978818	0.70442
C18_1	correlation	-0.132208	-0.417267	0.229401	-0.0795042	-0.543074	0.25137	1	0.00570214	-0.263422	-0.202022	-0.0264817
	significance (two tails)	0.682108	0.177155	0.473241	0.805985	0.0680493	0.430636		0.985968	0.408089	0.528916	0.934891
C18_2	correlation	-0.582196	0.124285	-0.608397	-0.278838	-0.125114	-0.155082	0.00570214	1	0.379392	0.416083	-0.299461
	significance (two tails)	0.0470158	0.700355	0.0358038	0.380137	0.698438	0.63033	0.985968		0.223859	0.178515	0.344349
C18_3	correlation	0.152099	0.588373	-0.33508	0.235822	-0.106474	0.233848	-0.263422	0.379392	1	0.550563	-0.33688
	significance (two tails)	0.637002	0.044176	0.287016	0.460591	0.741896	0.464464	0.408089	0.223859		0.0635988	0.284272
C20_4n6	correlation	-0.0621959	0.732822	-0.19434	0.245514	-0.394503	0.00860831	-0.202022	0.416083	0.550563	1	-0.204526
	significance (two tails)	0.847727	0.00670524	0.545021	0.441804	0.204423	0.978818	0.528916	0.178515	0.0635988		0.52371
C22_6n3	correlation	0.532031	0.0471181	0.551283	0.222195	0.162669	0.122528	-0.0264817	-0.299461	-0.33688	-0.204526	1
	significance (two tails)	0.0749959	0.884388	0.063182	0.487624	0.613474	0.70442	0.934891	0.344349	0.284272	0.52371
p__Verrucomicrobia__g__Akkermansia__s__muciniphila_593043	correlation
	significance (two tails)
p__Verrucomicrobia__g__Akkermansia__s__muciniphila_588471	correlation
	significance (two tails)
p__Verrucomicrobia__g__Akkermansia__s__muciniphila_363731	correlation
	significance (two tails)
p__Verrucomicrobia__g__Akkermansia__s__muciniphila_273232	correlation
	significance (two tails)
p__Proteobacteria__g__Trabulsiella_572750	correlation	-0.426741	-0.403053	-0.526882	-0.373761	0.0826383	-0.339659	-0.00300773	0.249711	-0.0332971	-0.0225325	-0.0775319
	significance (two tails)	0.166515	0.193898	0.0783953	0.231376	0.798473	0.280065	0.992598	0.433786	0.918179	0.944586	0.81072
p__Proteobacteria__g__Sutterella_4419621	correlation
	significance (two tails)
p__Proteobacteria__g__Sutterella_4338624	correlation	0.385413	-0.253626	0.229978	-0.0654775	-0.312679	0.0863372	0.579329	-0.434817	-0.216347	-0.18946	0.135289
	significance (two tails)	0.215988	0.426369	0.472098	0.839782	0.322401	0.789627	0.0483771	0.157771	0.499443	0.555358	0.675054
p__Proteobacteria__g__Sutterella_4095596	correlation	-0.145624	-0.2741	0.45834	0.329143	-0.329608	0.396085	0.344416	-0.532201	-0.443045	-0.479437	-0.0201519
	significance (two tails)	0.651569	0.388621	0.13399	0.29617	0.295448	0.20245	0.272948	0.0748857	0.149168	0.114756	0.950434
p__Proteobacteria__g__Sutterella_359809	correlation	-0.0109609	-0.194128	0.524809	0.453023	-0.0971719	0.328914	0.215012	-0.672086	-0.421329	-0.421698	0.0746296
	significance (two tails)	0.97303	0.545469	0.0797931	0.139147	0.763851	0.296526	0.502157	0.0166625	0.172542	0.172127	0.817698
p__Proteobacteria__g__Sutterella_215097	correlation	-0.0301832	0.0588417	0.322115	0.351103	-0.289216	0.0841157	0.0731534	-0.220686	0.00257565	0.330658	-0.293412
	significance (two tails)	0.925811	0.855861	0.307216	0.263122	0.361896	0.794937	0.821253	0.490662	0.993662	0.293818	0.354652
p__Proteobacteria__g__Sutterella_194360	correlation	0.0323995	0.0549451	0.00617183	-0.313247	0.178683	0.069469	-0.120636	0.264703	-0.00721297	0.354212	-0.0581913
	significance (two tails)	0.920378	0.865326	0.984812	0.321476	0.578462	0.830136	0.708808	0.405728	0.982251	0.258624	0.85744
p__Proteobacteria__g__Sutterella_189076	correlation	-0.0109609	-0.194128	0.524809	0.453023	-0.0971719	0.328914	0.215012	-0.672086	-0.421329	-0.421698	0.0746296
	significance (two tails)	0.97303	0.545469	0.0797931	0.139147	0.763851	0.296526	0.502157	0.0166625	0.172542	0.172127	0.817698
p__Proteobacteria__g__Sutterella_1820513	correlation
	significance (two tails)
p__Proteobacteria__g__Sutterella_112891	correlation	0.133903	-0.226609	0.302722	0.26092	0.192651	0.148071	-0.148299	-0.276601	0.183115	-0.378416	-0.106046
	significance (two tails)	0.678224	0.47879	0.338861	0.412721	0.54859	0.646051	0.645538	0.384132	0.568914	0.225152	0.742901
p__Proteobacteria__g__Shigella__s__sonnei_2072645	correlation	-0.0759953	0.367809	0.194657	0.106108	0.270663	-0.424787	-0.407891	0.22426	0.0246567	0.106095	0.00584959
	significance (two tails)	0.814413	0.239483	0.544353	0.742756	0.394835	0.168676	0.188094	0.483482	0.93937	0.742786	0.985605
p__Proteobacteria__g__Serratia_808486	correlation	0.306627	0.169793	0.638215	0.446418	-0.084444	0.191907	-0.00556951	-0.395919	-0.483265	-0.141693	0.866082
	significance (two tails)	0.332353	0.5978	0.0255303	0.145731	0.794152	0.550164	0.986294	0.202656	0.111473	0.660471	0.00026975
p__Proteobacteria__g__Serratia_3159130	correlation
	significance (two tails)
p__Proteobacteria__g__Proteus_768553	correlation	0.385413	-0.253626	0.229978	-0.0654775	-0.312679	0.0863372	0.579329	-0.434817	-0.216347	-0.18946	0.135289
	significance (two tails)	0.215988	0.426369	0.472098	0.839782	0.322401	0.789627	0.0483771	0.157771	0.499443	0.555358	0.675054
p__Proteobacteria__g__Ochrobactrum_256276	correlation	0.0990244	-0.241066	0.100877	-0.41684	-0.328316	-0.0372152	0.135654	0.0843946	-0.0733044	0.214648	-0.113553
	significance (two tails)	0.759465	0.450381	0.755086	0.177645	0.297458	0.908585	0.67422	0.79427	0.820889	0.502899	0.725303
p__Proteobacteria__g__Ochrobactrum_2458172	correlation	0.122496	-0.164277	0.573485	-0.112179	-0.0994058	-0.41173	0.171495	-0.100543	-0.303062	0.0835602	0.07298
	significance (two tails)	0.704496	0.609922	0.0512364	0.728513	0.758563	0.183566	0.594079	0.755876	0.338292	0.796266	0.82167
p__Proteobacteria__g__Morganella__s__morganii_4477719	correlation
	significance (two tails)
p__Proteobacteria__g__Klebsiella_813217	correlation	0.0866723	0.238416	-0.435451	-0.0556816	0.342927	0.197555	-0.39186	0.263939	0.473385	0.230903	0.190846
	significance (two tails)	0.788827	0.455526	0.157097	0.863536	0.275165	0.538256	0.207746	0.407136	0.120074	0.470267	0.552413
p__Proteobacteria__g__Helicobacter__s__pullorum_311173	correlation
	significance (two tails)
p__Proteobacteria__g__Haemophilus__s__parainfluenzae_4296080	correlation	0.316522	0.00987475	0.607024	0.121172	-0.23626	0.0102157	-0.0646628	-0.517201	-0.440972	-0.0153395	0.604726
	significance (two tails)	0.316167	0.975702	0.0363384	0.707563	0.459735	0.974863	0.841753	0.0850679	0.151307	0.962262	0.0372458
p__Proteobacteria__g__Haemophilus_341460	correlation	-0.0649435	0.426196	0.193382	0.368522	-0.432226	-0.22102	-0.0770165	-0.0215133	-0.225052	0.419715	0.222487
	significance (two tails)	0.841073	0.167116	0.547045	0.238503	0.160544	0.48999	0.811958	0.94709	0.481898	0.174366	0.487038
p__Proteobacteria__g__Haemophilus_153997	correlation	0.0273763	-0.367815	-0.0316308	-0.195714	-0.0164339	-0.00519347	-0.17289	-0.137724	0.182156	-0.0945197	-0.135607
	significance (two tails)	0.932696	0.239475	0.922262	0.542126	0.959572	0.98722	0.591035	0.669496	0.570975	0.770141	0.674328
p__Proteobacteria__g__Geobacter_3950373	correlation
	significance (two tails)
p__Proteobacteria__g__Erwinia_922761	correlation	-0.161008	0.0223743	-0.388438	-0.122561	0.576919	-0.440498	-0.70398	0.200709	0.0988044	-0.0127164	0.177349
	significance (two tails)	0.617148	0.944975	0.212095	0.704346	0.0495421	0.151798	0.0106091	0.531655	0.759986	0.968712	0.581347
p__Proteobacteria__g__Enterobacter__s__cloacae_210269	correlation	-0.156116	-0.164138	-0.0156945	-0.312277	0.201434	-0.411834	-0.139427	0.179398	-0.379106	0.145077	0.464174
	significance (two tails)	0.628023	0.610229	0.96139	0.323057	0.530142	0.183444	0.665618	0.576917	0.224238	0.652806	0.128475
p__Proteobacteria__g__Enhydrobacter_574102	correlation	-0.230628	0.273579	0.160033	0.341473	-0.204436	-0.449633	-0.00622561	0.199798	0.128227	0.470504	-0.218771
	significance (two tails)	0.470812	0.38956	0.619312	0.27734	0.523898	0.142502	0.98468	0.533557	0.691258	0.122662	0.494528
p__Proteobacteria__g__Delftia_1117255	correlation	0.208618	-0.149641	0.262537	-0.404595	-0.396308	-0.00320838	0.456551	0.128702	-0.0436746	0.101123	0.0943387
	significance (two tails)	0.515253	0.642519	0.409724	0.192037	0.202173	0.992104	0.135711	0.690163	0.892792	0.754504	0.770571
p__Proteobacteria__g__Cronobacter__s__dublinensis_667570	correlation	-0.541039	-0.353807	-0.490677	-0.612979	0.0382762	0.0531394	0.119249	0.500941	-0.17549	-0.148649	-0.324894
	significance (two tails)	0.0692946	0.259208	0.105295	0.0340604	0.905989	0.869718	0.712029	0.0971236	0.585378	0.64475	0.302822
p__Proteobacteria__g__Comamonas_581921	correlation	-0.0109609	-0.194128	0.524809	0.453023	-0.0971719	0.328914	0.215012	-0.672086	-0.421329	-0.421698	0.0746296
	significance (two tails)	0.97303	0.545469	0.0797931	0.139147	0.763851	0.296526	0.502157	0.0166625	0.172542	0.172127	0.817698
p__Proteobacteria__g__Citrobacter_674696	correlation	-0.432641	-0.374045	-0.408903	-0.410284	-0.057283	-0.43129	0.0316636	0.317087	-0.199245	-0.0518615	0.160277
	significance (two tails)	0.160098	0.230994	0.186894	0.185264	0.859645	0.161553	0.922182	0.315257	0.534714	0.872829	0.61877
p__Proteobacteria__g__Citrobacter_280706	correlation	-0.110628	-0.338536	-0.224386	-0.150294	0.247956	-0.181647	-0.21189	0.153766	0.301375	-0.176891	-0.161882
	significance (two tails)	0.732146	0.281761	0.48323	0.641052	0.437131	0.57207	0.508533	0.633271	0.341122	0.582339	0.615214
p__Proteobacteria__g__Campylobacter_297260	correlation
	significance (two tails)
p__Proteobacteria__g__Bilophila_361170	correlation	0.0925379	-0.290654	-0.0832379	-0.338426	-0.220264	0.169938	0.283905	-0.0288313	-0.254798	-0.308912	0.00373615
	significance (two tails)	0.77485	0.359404	0.797037	0.281928	0.491514	0.597484	0.371172	0.929127	0.424161	0.328576	0.990806
p__Proteobacteria__g__Acinetobacter__s__johnsonii_1896186	correlation	-0.00794582	0.363064	-0.4973	-0.0530284	0.447442	-0.414576	-0.747518	0.0521706	0.384438	0.17651	-0.118309
	significance (two tails)	0.980447	0.246065	0.0999721	0.869988	0.144697	0.180254	0.00519216	0.872076	0.21725	0.583167	0.714215
p__Proteobacteria__g__Acinetobacter_405425	correlation	0.162005	-0.155333	0.254572	-0.262841	-0.268926	-0.15622	-0.085851	-0.369128	-0.159487	0.118425	0.0170889
	significance (two tails)	0.614941	0.629769	0.424588	0.409163	0.397994	0.627791	0.790788	0.237673	0.620522	0.713945	0.957962
p__Proteobacteria__g__Acinetobacter_3453734	correlation	0.385413	-0.253626	0.229978	-0.0654775	-0.312679	0.0863372	0.579329	-0.434817	-0.216347	-0.18946	0.135289
	significance (two tails)	0.215988	0.426369	0.472098	0.839782	0.322401	0.789627	0.0483771	0.157771	0.499443	0.555358	0.675054
p__Proteobacteria__g__Acinetobacter_219826	correlation	0.196219	-0.0811989	0.341545	0.428392	0.104061	0.628501	-0.0352018	-0.445257	-0.367139	-0.299019	0.380174
	significance (two tails)	0.541063	0.801921	0.277232	0.164703	0.747575	0.0286053	0.913514	0.146909	0.240406	0.345096	0.222828
p__Proteobacteria__f__Sphingomonadaceae_860929	correlation
	significance (two tails)
p__Proteobacteria__f__Enterobacteriaceae_9710	correlation	0.293864	0.406829	-0.29603	-0.0486312	0.577209	-0.314222	-0.68855	-0.15967	0.32924	0.073843	-0.146939
	significance (two tails)	0.353878	0.189359	0.350174	0.880698	0.0494011	0.319891	0.0132865	0.620116	0.296019	0.819592	0.648603
p__Proteobacteria__f__Enterobacteriaceae_820346	correlation	0.39458	-0.0718731	-0.22225	-0.366861	0.655816	-0.270408	-0.238742	-0.299264	0.0242307	-0.200413	-0.210604
	significance (two tails)	0.204326	0.824337	0.487514	0.24079	0.0205791	0.395298	0.454893	0.344682	0.940416	0.532272	0.511169
p__Proteobacteria__f__Enterobacteriaceae_816702	correlation	0.0642264	0.483154	-0.233348	0.137019	0.104643	-0.0949141	-0.480192	0.464976	0.505357	0.444189	0.381534
	significance (two tails)	0.842809	0.111568	0.465446	0.671104	0.746203	0.769205	0.114103	0.12773	0.093743	0.147997	0.22104
p__Proteobacteria__f__Enterobacteriaceae_797229	correlation	-0.13889	-0.263647	-0.164269	-0.565173	0.268802	-0.143211	-0.0117028	0.09916	-0.510983	-0.253854	0.0050433
	significance (two tails)	0.666841	0.407675	0.609941	0.0555048	0.398221	0.657029	0.971205	0.759145	0.0895515	0.425939	0.987589
p__Proteobacteria__f__Enterobacteriaceae_782953	correlation	-0.170373	-0.00817888	-0.103927	-0.348465	0.0309896	-0.14504	0.0963014	0.0743064	-0.3941	-0.0681214	-0.0664103
	significance (two tails)	0.596531	0.979874	0.747889	0.266974	0.923834	0.65289	0.765914	0.818476	0.204928	0.83339	0.837526
p__Proteobacteria__f__Enterobacteriaceae_754778	correlation	0.341848	0.174481	0.625764	0.529123	-0.1546	0.48215	0.0486138	-0.440005	-0.395077	-0.155621	0.776309
	significance (two tails)	0.276778	0.587572	0.0295181	0.0769031	0.631407	0.112423	0.880741	0.152312	0.203705	0.629126	0.00298765
p__Proteobacteria__f__Enterobacteriaceae_746679	correlation	-0.570062	0.0896609	-0.553892	-0.104534	0.150838	-0.323317	-0.429003	0.485592	0.17106	0.331265	-0.123918
	significance (two tails)	0.0529653	0.781698	0.0616867	0.746459	0.639831	0.30531	0.164036	0.109509	0.595031	0.292879	0.701203
p__Proteobacteria__f__Enterobacteriaceae_676211	correlation	0.320853	0.0488809	0.262018	0.0282831	-0.119004	-0.178657	0.547901	-0.114987	-0.0874538	0.161693	0.222412
	significance (two tails)	0.309223	0.88009	0.410685	0.930471	0.712598	0.578517	0.0651569	0.721954	0.786961	0.615633	0.487188
p__Proteobacteria__f__Enterobacteriaceae_668514	correlation	0.180066	0.123474	0.512341	0.211751	0.0473772	-0.317474	-0.0912026	-0.234734	-0.514276	-0.0869721	0.812155
	significance (two tails)	0.575476	0.702232	0.0885589	0.508817	0.883756	0.314634	0.778027	0.462723	0.0871579	0.788111	0.0013311
p__Proteobacteria__f__Enterobacteriaceae_588216	correlation	-0.0509324	-0.28656	0.0327696	-0.571896	0.0906882	-0.30694	-0.012669	-0.014535	-0.436257	-0.14608	-0.20201
	significance (two tails)	0.875091	0.36652	0.919471	0.0520341	0.779251	0.331834	0.968829	0.96424	0.156244	0.650541	0.528942
p__Proteobacteria__f__Enterobacteriaceae_581782	correlation	-0.219349	-0.0670821	-0.261049	-0.114269	0.475908	-0.196962	-0.227844	-0.0134734	-0.102688	-0.483238	-0.266601
	significance (two tails)	0.493359	0.835902	0.412482	0.72363	0.117838	0.539501	0.476332	0.966851	0.750811	0.111496	0.402243
p__Proteobacteria__f__Enterobacteriaceae_581021	correlation	-0.118212	0.340335	-0.569507	-0.0719777	0.180549	-0.0711818	-0.447112	0.454997	0.457941	0.473207	0.125745
	significance (two tails)	0.71444	0.279048	0.0532493	0.824085	0.574435	0.826004	0.14503	0.137218	0.134372	0.120233	0.696982
p__Proteobacteria__f__Enterobacteriaceae_566243	correlation	-0.398175	0.0768116	-0.272074	-0.0744467	0.261107	0.0739455	-0.289062	0.26754	-0.0128702	-0.14702	-0.226417
	significance (two tails)	0.199861	0.812451	0.392277	0.818138	0.412374	0.819345	0.362163	0.400525	0.968334	0.64842	0.479173
p__Proteobacteria__f__Enterobacteriaceae_559204	correlation	-0.303045	-0.301251	-0.243931	-0.345697	0.15627	-0.451254	-0.0847023	0.202971	-0.283128	0.0470654	0.3033
	significance (two tails)	0.338321	0.34133	0.444847	0.271051	0.62768	0.140892	0.793534	0.526942	0.372539	0.884516	0.337894
p__Proteobacteria__f__Enterobacteriaceae_538000	correlation	0.461114	-0.082962	0.300021	-0.298494	0.274524	-0.450557	-0.261377	-0.565572	-0.367056	-0.0990079	0.312167
	significance (two tails)	0.131349	0.797698	0.343403	0.345984	0.387859	0.141582	0.411873	0.0552944	0.24052	0.759504	0.323237
p__Proteobacteria__f__Enterobacteriaceae_528421	correlation	-0.0807024	-0.368885	-0.441743	-0.402015	0.235776	-0.204393	-0.0227689	0.327639	0.38927	-0.135905	-0.135062
	significance (two tails)	0.803111	0.238005	0.15051	0.195158	0.460681	0.523987	0.944006	0.298515	0.211033	0.673648	0.675575
p__Proteobacteria__f__Enterobacteriaceae_518002	correlation	-0.164073	0.291713	-0.109383	-0.0630273	0.306173	-0.230746	-0.52099	0.182453	-0.104318	0.133741	0.239145
	significance (two tails)	0.610374	0.357575	0.735064	0.845712	0.333106	0.470578	0.0824125	0.570336	0.746968	0.678596	0.454108
p__Proteobacteria__f__Enterobacteriaceae_4461030	correlation	0.442828	0.520226	0.0524354	0.0340691	0.0333888	0.166174	-0.0872988	0.183111	0.503706	0.490379	0.252371
	significance (two tails)	0.149392	0.0829432	0.871432	0.916288	0.917954	0.605744	0.787331	0.568922	0.0949975	0.105539	0.428739
p__Proteobacteria__f__Enterobacteriaceae_4333897	correlation	0.0851749	-0.0216838	-0.177146	-0.23163	0.624505	-0.183257	-0.238516	0.225839	0.330135	-0.249905	-0.147412
	significance (two tails)	0.792404	0.946671	0.581787	0.468832	0.0299446	0.568608	0.455333	0.480327	0.294629	0.433417	0.647536
p__Proteobacteria__f__Enterobacteriaceae_4111715	correlation	-0.270135	0.0640213	-0.117969	0.0508925	0.14918	0.00354617	-0.281619	0.201748	-0.280193	-0.313562	0.293808
	significance (two tails)	0.395794	0.843306	0.715005	0.875188	0.643556	0.991273	0.375203	0.529488	0.377729	0.320964	0.353974
p__Proteobacteria__f__Enterobacteriaceae_3829957	correlation	0.0675216	-0.121804	0.408076	-0.0983169	0.0854428	0.0290713	0.285246	-0.0909878	-0.528118	-0.271116	0.16437
	significance (two tails)	0.83484	0.706098	0.187875	0.76114	0.791764	0.928538	0.368819	0.778538	0.07757	0.394013	0.609717
p__Proteobacteria__f__Enterobacteriaceae_368849	correlation	-0.145486	-0.172959	0.0416279	-0.0861965	0.0909187	-0.467334	-0.0715713	-0.013561	-0.414407	-0.0812855	0.568196
	significance (two tails)	0.651882	0.590886	0.897793	0.789963	0.778702	0.125551	0.825065	0.966635	0.180449	0.801713	0.053925
p__Proteobacteria__f__Enterobacteriaceae_366451	correlation	0.157795	-0.186269	-0.388802	-0.32486	0.418967	-0.0892546	0.0254868	0.20886	0.16654	-0.0229815	0.279158
	significance (two tails)	0.624283	0.562158	0.21163	0.302874	0.175216	0.782666	0.937333	0.514754	0.604939	0.943484	0.379569
p__Proteobacteria__f__Enterobacteriaceae_3531225	correlation	-0.129368	0.0325959	-0.171723	-0.203263	0.35663	-0.0714618	-0.215261	0.155244	-0.0258856	-0.275754	-0.292222
	significance (two tails)	0.688631	0.919897	0.593582	0.526333	0.255156	0.825329	0.50165	0.629968	0.936354	0.385648	0.356699
p__Proteobacteria__f__Enterobacteriaceae_345362	correlation	-0.404466	-0.259423	-0.465433	-0.615335	0.325858	-0.239534	-0.269907	0.300119	-0.249568	-0.161956	-0.410074
	significance (two tails)	0.192192	0.415504	0.127305	0.0331883	0.301305	0.453352	0.396208	0.343238	0.434058	0.61505	0.18551
p__Proteobacteria__f__Enterobacteriaceae_331697	correlation	-0.0976438	-0.0206208	-0.0793195	-0.0479283	0.0459173	-0.423228	-0.395429	0.226796	0.0996949	0.162547	0.239582
	significance (two tails)	0.762733	0.949282	0.806428	0.882412	0.887317	0.170413	0.203267	0.478419	0.757879	0.613744	0.453259
p__Proteobacteria__f__Enterobacteriaceae_304641	correlation	-0.53752	-0.391852	-0.461684	-0.524652	0.247155	0.0374104	0.0628431	0.343335	-0.256674	-0.232576	-0.286679
	significance (two tails)	0.0714853	0.207756	0.130811	0.0798994	0.438661	0.908107	0.846158	0.274556	0.42064	0.466966	0.366312
p__Proteobacteria__f__Enterobacteriaceae_301149	correlation	-0.654426	0.0917854	-0.243167	-0.0800747	0.160948	-0.4291	-0.148152	0.468683	-0.0982669	0.0579572	-0.395865
	significance (two tails)	0.0209422	0.77664	0.44632	0.804616	0.617282	0.16393	0.64587	0.124316	0.761258	0.858008	0.202724
p__Proteobacteria__f__Enterobacteriaceae_299267	correlation	-0.1384	0.270292	-0.293336	-0.248104	0.200274	-0.158003	-0.230496	0.334312	-0.150013	0.151807	0.143497
	significance (two tails)	0.667956	0.395509	0.354784	0.436847	0.532564	0.623819	0.471072	0.288191	0.641682	0.637655	0.656381
p__Proteobacteria__f__Enterobacteriaceae_295053	correlation	0.217724	0.160678	0.185109	-0.0900483	0.338273	-0.626235	-0.459323	-0.306984	-0.050651	-0.131162	-0.0676457
	significance (two tails)	0.496649	0.61788	0.564638	0.780775	0.282159	0.0293595	0.13305	0.331762	0.875776	0.684509	0.83454
p__Proteobacteria__f__Enterobacteriaceae_2689396	correlation	-0.356014	-0.25325	-0.538361	-0.504691	0.272516	-0.106864	-0.0651345	0.259298	-0.0797995	-0.392097	-0.400043
	significance (two tails)	0.256038	0.427078	0.0709571	0.0942473	0.391479	0.740978	0.840611	0.415737	0.805276	0.207446	0.197565
p__Proteobacteria__f__Enterobacteriaceae_231787	correlation	-0.00994815	-0.0506305	0.508882	0.407782	-0.0875993	0.198448	0.282899	-0.144216	-0.225526	-0.449645	0.0189707
	significance (two tails)	0.975521	0.875826	0.0911015	0.188223	0.786614	0.536383	0.372944	0.654753	0.480951	0.14249	0.953337
p__Proteobacteria__f__Enterobacteriaceae_228556	correlation	-0.0364205	-0.283209	0.0402022	-0.0511248	0.269436	-0.385161	-0.253963	0.03057	-0.0158057	-0.219999	0.311511
	significance (two tails)	0.91053	0.372397	0.901278	0.874623	0.397065	0.216313	0.425735	0.924863	0.961116	0.492047	0.324308
p__Proteobacteria__f__Enterobacteriaceae_197286	correlation	-0.255209	0.0303048	-0.57604	-0.199518	0.092765	0.151569	-0.116647	0.573583	0.564444	0.332636	-0.174446
	significance (two tails)	0.423388	0.925513	0.0499722	0.534144	0.77431	0.63819	0.718084	0.0511874	0.0558909	0.290764	0.587647
p__Proteobacteria__f__Enterobacteriaceae_173654	correlation	-0.577706	-0.38186	-0.260108	-0.369035	-0.0646372	-0.203937	0.258173	0.388434	-0.290488	-0.463728	-0.254487
	significance (two tails)	0.0491593	0.220612	0.41423	0.237799	0.841815	0.524933	0.417835	0.212101	0.359691	0.128892	0.424747
p__Proteobacteria__f__Enterobacteriaceae_1111294	correlation	-0.0524342	-0.212722	-0.0650929	-0.384656	0.0889961	0.140525	0.250032	0.0469824	-0.239858	-0.30269	-0.244852
	significance (two tails)	0.871435	0.506831	0.840712	0.216968	0.783283	0.663121	0.433175	0.884719	0.452724	0.338914	0.443076
p__Fusobacteria__g__Fusobacterium_572889	correlation	0.303586	0.00126034	0.313613	0.0205293	0.185834	-0.0711353	-0.325455	-0.22035	-0.481381	-0.0154223	0.759093
	significance (two tails)	0.337415	0.996898	0.32088	0.949507	0.563087	0.826116	0.301938	0.49134	0.113081	0.962059	0.00419447
p__Fusobacteria__g__Fusobacterium_444857	correlation	0.387771	-0.0726435	0.536826	0.116939	-0.16865	-0.183058	0.309891	-0.461305	-0.529375	-0.189454	0.701102
	significance (two tails)	0.212951	0.822481	0.0719224	0.717404	0.600306	0.569037	0.326966	0.131168	0.0767363	0.55537	0.0110749
p__Fusobacteria__g__Fusobacterium_4439398	correlation	0.202804	0.0179395	-0.015592	0.052352	0.356815	0.166446	-0.320319	0.0451395	-0.249222	-0.0360872	0.518679
	significance (two tails)	0.527289	0.955871	0.961641	0.871635	0.254892	0.605145	0.310074	0.889216	0.434716	0.911346	0.084025
p__Fusobacteria__g__Fusobacterium_3073894	correlation
	significance (two tails)
p__Fusobacteria__g__Fusobacterium_1139769	correlation	0.319527	-0.315663	0.485156	-0.11282	-0.339427	-0.211774	0.493753	-0.507852	-0.390799	-0.267548	0.138654
	significance (two tails)	0.311341	0.317556	0.109875	0.727016	0.280416	0.50877	0.1028	0.0918676	0.209089	0.40051	0.667377
p__Firmicutes__o__Clostridiales_564806	correlation	-0.629189	-0.476467	-0.528123	-0.418296	0.179383	0.00306277	0.139911	0.239828	-0.287567	-0.465416	-0.292714
	significance (two tails)	0.028379	0.117346	0.0775663	0.175979	0.57695	0.992463	0.664516	0.452781	0.364763	0.127321	0.355852
p__Firmicutes__o__Clostridiales_562376	correlation
	significance (two tails)
p__Firmicutes__o__Clostridiales_509416	correlation	0.589783	-0.358563	0.30378	-0.273393	0.204448	-0.0190216	0.130457	-0.667596	-0.139942	-0.284946	-0.0820184
	significance (two tails)	0.043545	0.252405	0.337092	0.389896	0.523874	0.953212	0.686127	0.0176833	0.664447	0.369344	0.799957
p__Firmicutes__o__Clostridiales_369429	correlation	0.514924	-0.31491	0.323821	-0.225981	0.0280373	0.021822	0.310919	-0.730478	-0.34331	-0.246788	0.00997046
	significance (two tails)	0.0866919	0.318775	0.304514	0.480043	0.931074	0.946332	0.325278	0.00697421	0.274593	0.439363	0.975467
p__Firmicutes__o__Clostridiales_316728	correlation
	significance (two tails)
p__Firmicutes__o__Clostridiales_2415201	correlation
	significance (two tails)
p__Firmicutes__o__Clostridiales_191043	correlation
	significance (two tails)
p__Firmicutes__o__Clostridiales_179067	correlation
	significance (two tails)
p__Firmicutes__g__Veillonella__s__parvula_518743	correlation	0.190641	0.0597401	0.131535	0.374762	-0.239501	0.948895	0.166113	-0.241853	0.144014	-0.080837	-0.0469201
	significance (two tails)	0.552849	0.853681	0.683653	0.230029	0.453417	2.51897e-06	0.605878	0.448858	0.65521	0.802788	0.884871
p__Firmicutes__g__Veillonella__s__parvula_4391625	correlation	-0.530525	-0.383047	-0.621263	-0.581797	-0.286179	-0.222959	0.153959	0.565723	0.0386068	-0.0106884	-0.226292
	significance (two tails)	0.0759797	0.21906	0.0310641	0.0472036	0.367184	0.486091	0.632837	0.0552152	0.90518	0.9737	0.479422
p__Firmicutes__g__Veillonella__s__parvula_3889756	correlation	-0.347237	-0.499155	-0.689107	-0.463277	0.215402	0.222722	0.00532787	0.223684	-0.127876	-0.320305	-0.139109
	significance (two tails)	0.268777	0.0985137	0.013182	0.129314	0.501364	0.486565	0.986889	0.484636	0.692066	0.310097	0.666341
p__Firmicutes__g__Veillonella__s__parvula_3801267	correlation	0.0414341	-0.13387	0.133369	0.316537	-0.186648	0.639698	0.127642	-0.266918	-0.216546	-0.171479	0.458859
	significance (two tails)	0.898266	0.678302	0.679448	0.316145	0.56135	0.0250829	0.692605	0.401662	0.499038	0.594114	0.133493
p__Firmicutes__g__Veillonella__s__dispar_962249	correlation	-0.554085	-0.35588	-0.775833	-0.592802	-0.0700793	-0.325642	-0.0841361	0.416823	0.0621471	0.0876854	-0.569941
	significance (two tails)	0.061577	0.256229	0.00301696	0.0422158	0.828664	0.301645	0.794888	0.177664	0.847845	0.786409	0.0530273
p__Firmicutes__g__Veillonella__s__dispar_4401373	correlation	-0.233138	-0.394094	-0.35308	-0.24387	0.213459	-0.255103	-0.158496	0.202572	0.212142	-0.139399	-0.147701
	significance (two tails)	0.465859	0.204935	0.260256	0.444965	0.505324	0.423588	0.622723	0.527771	0.508017	0.665682	0.646885
p__Firmicutes__g__Veillonella__s__dispar_4316391	correlation	-0.426741	-0.403053	-0.526882	-0.373761	0.0826383	-0.339659	-0.00300773	0.249711	-0.0332971	-0.0225325	-0.0775319
	significance (two tails)	0.166515	0.193898	0.0783953	0.231376	0.798473	0.280065	0.992598	0.433786	0.918179	0.944586	0.81072
p__Firmicutes__g__Veillonella__s__dispar_4310208	correlation	-0.274644	-0.354011	-0.420749	-0.0771514	-0.106116	0.408243	0.12763	0.0582506	0.0801188	-0.0859831	-0.11403
	significance (two tails)	0.387642	0.258914	0.173197	0.811634	0.742736	0.187676	0.692633	0.857296	0.80451	0.790473	0.724188
p__Firmicutes__g__Veillonella__s__dispar_4296244	correlation	-0.018365	0.00433942	-0.257818	-0.218478	-0.382678	0.0139863	-0.00895748	-0.281591	-0.0954077	0.243605	-0.206124
	significance (two tails)	0.954825	0.989321	0.418498	0.495122	0.219542	0.96559	0.977959	0.375253	0.768034	0.445476	0.520402
p__Firmicutes__g__Veillonella__s__dispar_342427	correlation	-0.279399	-0.456584	-0.762411	-0.662133	-0.0141814	0.0296366	0.0969319	0.313822	0.115872	-0.166523	-0.377772
	significance (two tails)	0.379139	0.135679	0.0039373	0.0189864	0.96511	0.927151	0.76442	0.320541	0.71989	0.604977	0.226007
p__Firmicutes__g__Veillonella_4440670	correlation	0.385413	-0.253626	0.229978	-0.0654775	-0.312679	0.0863372	0.579329	-0.434817	-0.216347	-0.18946	0.135289
	significance (two tails)	0.215988	0.426369	0.472098	0.839782	0.322401	0.789627	0.0483771	0.157771	0.499443	0.555358	0.675054
p__Firmicutes__g__Veillonella_368099	correlation
	significance (two tails)
p__Firmicutes__g__Veillonella_1144463	correlation
	significance (two tails)
p__Firmicutes__g__Veillonella_1023075	correlation	-0.171011	-0.340728	-0.151446	-0.524392	-0.350784	-0.255666	0.0119671	0.017618	-0.106152	0.0852488	-0.107218
	significance (two tails)	0.595136	0.278457	0.638467	0.080076	0.263585	0.42253	0.970555	0.956661	0.742651	0.792228	0.740145
p__Firmicutes__g__Streptococcus__s__luteciae_303161	correlation
	significance (two tails)
p__Firmicutes__g__Streptococcus_967427	correlation	-0.171588	0.309178	0.316532	0.683986	-0.225423	-0.242439	-0.0960462	-0.0631258	-0.00729126	0.0832117	0.0828366
	significance (two tails)	0.593877	0.328138	0.316151	0.0141664	0.481157	0.447724	0.766519	0.845474	0.982058	0.7971	0.797998
p__Firmicutes__g__Streptococcus_593803	correlation	-0.140431	0.233427	0.346532	0.750975	-0.505112	0.165911	0.154315	-0.144851	0.0658864	0.0745161	-0.00635799
	significance (two tails)	0.663336	0.46529	0.269817	0.00487721	0.0939279	0.606322	0.632042	0.653316	0.838793	0.817971	0.984354
p__Firmicutes__g__Streptococcus_579608	correlation	-0.280522	0.68107	0.0541504	0.657396	-0.149283	-0.0262199	-0.332949	0.196015	0.339791	0.382096	-0.33253
	significance (two tails)	0.377145	0.0147507	0.867259	0.0201717	0.643324	0.935534	0.290283	0.541492	0.279867	0.220303	0.290928
p__Firmicutes__g__Streptococcus_561636	correlation	-0.101956	0.106685	0.334162	0.198283	0.152873	-0.622901	-0.18566	-0.0210838	-0.358063	-0.201475	0.464665
	significance (two tails)	0.752538	0.741398	0.28842	0.53673	0.635267	0.0304948	0.56346	0.948145	0.253115	0.530055	0.128018
p__Firmicutes__g__Streptococcus_522025	correlation	0.0616758	0.243314	0.469838	0.299676	0.11981	-0.481774	-0.216582	-0.122119	-0.35424	-0.141118	0.567557
	significance (two tails)	0.848987	0.446036	0.123266	0.343985	0.710727	0.112744	0.498964	0.705369	0.258584	0.661776	0.0542561
p__Firmicutes__g__Streptococcus_516966	correlation	0.157218	0.620991	0.0348295	0.520045	0.217394	-0.363554	-0.64047	-0.140382	0.298862	0.171062	0.151544
	significance (two tails)	0.625567	0.0311594	0.914425	0.0830689	0.497318	0.24538	0.0248521	0.663447	0.345362	0.595025	0.638247
p__Firmicutes__g__Streptococcus_516611	correlation	-0.0956359	0.168509	0.220398	0.183823	0.165906	-0.604757	-0.30803	-0.0144066	-0.289091	-0.0975281	0.514787
	significance (two tails)	0.767493	0.600613	0.491243	0.567394	0.606334	0.0372335	0.330031	0.964556	0.362113	0.763007	0.0867904
p__Firmicutes__g__Streptococcus_349024	correlation
	significance (two tails)
p__Firmicutes__g__Streptococcus_3449122	correlation	-0.0515711	0.300969	0.349485	0.461581	0.0749478	-0.175915	-0.188182	-0.031134	-0.0114535	-0.245024	0.0332181
	significance (two tails)	0.873536	0.341805	0.26548	0.130908	0.816932	0.584457	0.558078	0.92348	0.971819	0.442745	0.918372
p__Firmicutes__g__Streptococcus_316587	correlation	0.255911	0.0461799	0.060596	0.244814	0.134577	0.645141	-0.147657	-0.0991355	-0.106773	-0.0712968	0.361023
	significance (two tails)	0.422071	0.886677	0.851605	0.443148	0.676684	0.0234891	0.646983	0.759202	0.741192	0.825727	0.248927
p__Firmicutes__g__Streptococcus_301270	correlation	-0.0844044	0.776532	-0.230592	0.572968	-0.422545	0.130416	-0.197287	0.0828857	0.529805	0.646979	-0.330575
	significance (two tails)	0.794247	0.002974	0.470883	0.0514952	0.171177	0.686222	0.538819	0.79788	0.0764528	0.0229681	0.293946
p__Firmicutes__g__Streptococcus_1082539	correlation	0.274463	0.389978	0.693119	0.727017	-0.302486	0.0931886	-0.194988	-0.403463	0.0429763	0.00539494	0.277606
	significance (two tails)	0.387968	0.210132	0.012447	0.00738608	0.339256	0.773303	0.543655	0.193402	0.894498	0.986724	0.382335
p__Firmicutes__g__Streptococcus_1078207	correlation	0.304511	0.221304	0.238682	-0.000682203	0.0685484	-0.643009	-0.253443	0.0175273	0.0350685	0.19425	0.394874
	significance (two tails)	0.335871	0.489416	0.455009	0.998321	0.832359	0.0241044	0.426716	0.956884	0.91384	0.545211	0.203959
p__Firmicutes__g__Streptococcus_1000547	correlation	-0.00980339	-0.00226399	0.551811	0.207747	0.081305	-0.492204	0.0695446	-0.100621	-0.490742	-0.31915	0.449439
	significance (two tails)	0.975878	0.994428	0.0628771	0.517048	0.801667	0.104052	0.829954	0.755691	0.105242	0.311944	0.142695
p__Firmicutes__g__Staphylococcus_4323284	correlation	-0.139665	-0.0706715	0.0747789	0.0414369	-0.439217	-0.142181	0.579233	0.0157878	-0.1258	0.28809	-0.299183
	significance (two tails)	0.665077	0.827235	0.817339	0.89826	0.153133	0.659364	0.0484231	0.96116	0.696855	0.363852	0.344819
p__Firmicutes__g__Staphylococcus_1084865	correlation	-0.0854065	0.0147622	0.111201	0.199719	-0.531041	-0.102505	0.373692	-0.0953541	0.0262178	0.373294	-0.239189
	significance (two tails)	0.791851	0.963682	0.730803	0.533723	0.0756414	0.751243	0.231469	0.768161	0.935539	0.232006	0.454022
p__Firmicutes__g__Staphylococcus_1076316	correlation	0.0950428	0.106118	-0.0269036	-0.012353	-0.345264	-0.018234	0.193912	-0.0112677	0.0535544	0.377671	-0.341925
	significance (two tails)	0.7689	0.742731	0.933856	0.969606	0.271691	0.955147	0.545924	0.972276	0.868709	0.226142	0.276662
p__Firmicutes__g__Ruminococcus__s__gnavus_360015	correlation	-0.0844044	0.776532	-0.230592	0.572968	-0.422545	0.130416	-0.197287	0.0828857	0.529805	0.646979	-0.330575
	significance (two tails)	0.794247	0.002974	0.470883	0.0514952	0.171177	0.686222	0.538819	0.79788	0.0764528	0.0229681	0.293946
p__Firmicutes__g__Ruminococcus_591635	correlation	0.544134	-0.152566	0.0623001	-0.398058	0.422374	-0.0323771	-0.22207	-0.317987	-0.297339	-0.00595662	0.274872
	significance (two tails)	0.0674068	0.635956	0.847474	0.200006	0.171368	0.920433	0.487876	0.313809	0.347945	0.985342	0.387232
p__Firmicutes__g__Ruminococcus_586271	correlation
	significance (two tails)
p__Firmicutes__g__Ruminococcus_563086	correlation
	significance (two tails)
p__Firmicutes__g__Ruminococcus_4390330	correlation
	significance (two tails)
p__Firmicutes__g__Ruminococcus_3421266	correlation
	significance (two tails)
p__Firmicutes__g__Ruminococcus_304211	correlation	0.635304	-0.157377	0.279898	-0.196532	0.0152575	-0.0918409	0.362089	-0.517123	-0.168365	-0.171686	0.306
	significance (two tails)	0.0264252	0.625213	0.378254	0.540404	0.962464	0.776508	0.247429	0.0851235	0.600929	0.593662	0.333394
p__Firmicutes__g__Ruminococcus_199543	correlation
	significance (two tails)
p__Firmicutes__g__Roseburia_701221	correlation	0.0191848	-0.546063	0.201642	-0.298144	0.0549167	0.0415035	0.518009	-0.438329	-0.588785	-0.624299	-0.154148
	significance (two tails)	0.952811	0.0662478	0.529709	0.346578	0.865395	0.898097	0.084497	0.154061	0.043991	0.0300151	0.632417
p__Firmicutes__g__Roseburia_508968	correlation	0.0725919	-0.7665	-0.0149832	-0.513157	0.109411	-0.0138724	0.308613	-0.518315	-0.35727	-0.601555	-0.259441
	significance (two tails)	0.822605	0.00363706	0.963138	0.0879657	0.734998	0.96587	0.32907	0.0842813	0.254244	0.0385247	0.41547
p__Firmicutes__g__Robinsoniella__s__peoriensis_4325509	correlation
	significance (two tails)
p__Firmicutes__g__Pseudoramibacter_Eubacterium_191975	correlation
	significance (two tails)
p__Firmicutes__g__Phascolarctobacterium_556835	correlation	0.0139208	-0.160777	0.205426	-0.16486	-0.631784	0.31682	0.488371	0.0448491	0.0321966	-0.0736724	0.0561303
	significance (two tails)	0.965751	0.617661	0.521845	0.608637	0.0275378	0.315687	0.107193	0.889925	0.920875	0.820003	0.862445
p__Firmicutes__g__Phascolarctobacterium_3138798	correlation	-0.0882477	-0.280919	0.019656	-0.226079	-0.589406	0.194504	0.52035	0.0175621	-0.172968	-0.22989	-0.114849
	significance (two tails)	0.785067	0.376443	0.951653	0.479846	0.0437129	0.544675	0.0828565	0.956799	0.590865	0.472271	0.722275
p__Firmicutes__g__Phascolarctobacterium_275237	correlation	0.308972	0.177912	0.119392	0.109366	-0.0941036	0.299697	0.389908	0.223265	0.421099	0.141735	0.333137
	significance (two tails)	0.328477	0.58013	0.711698	0.735104	0.77113	0.343951	0.210221	0.485477	0.172802	0.660374	0.289994
p__Firmicutes__g__Oscillospira_533847	correlation
	significance (two tails)
p__Firmicutes__g__Oscillospira_367176	correlation
	significance (two tails)
p__Firmicutes__g__Oscillospira_199422	correlation	0.393518	-0.29728	0.526652	-0.115109	-0.104521	-0.204852	0.165713	-0.474332	-0.5724	-0.259625	0.448719
	significance (two tails)	0.205658	0.348045	0.0785493	0.72167	0.746489	0.523036	0.606758	0.119231	0.0517798	0.415127	0.143416
p__Firmicutes__g__Megasphaera_817140	correlation	-0.0109609	-0.194128	0.524809	0.453023	-0.0971719	0.328914	0.215012	-0.672086	-0.421329	-0.421698	0.0746296
	significance (two tails)	0.97303	0.545469	0.0797931	0.139147	0.763851	0.296526	0.502157	0.0166625	0.172542	0.172127	0.817698
p__Firmicutes__g__Megasphaera_539819	correlation
	significance (two tails)
p__Firmicutes__g__Megasphaera_4296242	correlation
	significance (two tails)
p__Firmicutes__g__Megasphaera_264967	correlation	-0.222728	-0.217345	0.193159	-0.170311	-0.345699	0.359037	0.271939	0.0372495	-0.289662	-0.105014	-0.164376
	significance (two tails)	0.486555	0.497416	0.547514	0.596667	0.271047	0.251732	0.392522	0.908501	0.361121	0.745329	0.609705
p__Firmicutes__g__Megamonas_325808	correlation	-0.317543	0.0516493	-0.0603108	0.142941	-0.0414488	-0.170211	0.0126558	0.371566	0.0960548	0.37785	-0.328394
	significance (two tails)	0.314523	0.873345	0.852296	0.65764	0.89823	0.596886	0.968861	0.234346	0.766499	0.225904	0.297336
p__Firmicutes__g__Leuconostoc_540940	correlation
	significance (two tails)
p__Firmicutes__g__Lactobacillus__s__zeae_73609	correlation	0.230581	-0.149015	0.0629471	-0.55745	0.316091	-0.26213	-0.236877	0.0273732	-0.278454	-0.0016385	0.0451527
	significance (two tails)	0.470903	0.643926	0.845907	0.0596879	0.316864	0.410478	0.458529	0.932704	0.380821	0.995968	0.889183
p__Firmicutes__g__Lactobacillus__s__reuteri_411486	correlation
	significance (two tails)
p__Firmicutes__g__Lactobacillus_588197	correlation	0.162005	-0.155333	0.254572	-0.262841	-0.268926	-0.15622	-0.085851	-0.369128	-0.159487	0.118425	0.0170889
	significance (two tails)	0.614941	0.629769	0.424588	0.409163	0.397994	0.627791	0.790788	0.237673	0.620522	0.713945	0.957962
p__Firmicutes__g__Lactobacillus_354905	correlation	0.0393293	0.48272	0.0225634	0.130676	0.235774	0.0260937	-0.596774	0.046593	0.20007	0.378727	-0.0200188
	significance (two tails)	0.903412	0.111937	0.94451	0.685625	0.460685	0.935843	0.0405109	0.885669	0.532988	0.22474	0.950761
p__Firmicutes__g__Lactobacillus_292057	correlation	0.39458	-0.0718731	-0.22225	-0.366861	0.655816	-0.270408	-0.238742	-0.299264	0.0242307	-0.200413	-0.210604
	significance (two tails)	0.204326	0.824337	0.487514	0.24079	0.0205791	0.395298	0.454893	0.344682	0.940416	0.532272	0.511169
p__Firmicutes__g__Lactobacillus_202131	correlation
	significance (two tails)
p__Firmicutes__g__Lactobacillus_1995182	correlation	0.0417244	0.547499	-0.149641	-0.0024062	0.261168	-0.0847738	-0.666231	0.255096	0.34008	0.503508	-0.041953
	significance (two tails)	0.897557	0.0653945	0.642518	0.994079	0.412261	0.793363	0.0180026	0.4236	0.279431	0.0951485	0.896998
p__Firmicutes__g__Lachnospira_369486	correlation	0.352887	-0.106832	0.739668	0.229318	-0.215853	0.206751	0.345868	-0.604358	-0.396406	-0.154983	0.519898
	significance (two tails)	0.260536	0.741054	0.00596413	0.473405	0.500445	0.519105	0.270797	0.0373926	0.202051	0.630551	0.0831719
p__Firmicutes__g__Lachnospira_350865	correlation	-0.402493	-0.569934	-0.224191	-0.359164	-0.284626	0.178971	0.543238	-0.0217204	-0.406303	-0.555117	-0.225364
	significance (two tails)	0.194577	0.0530309	0.483621	0.251552	0.369905	0.577839	0.0679496	0.946581	0.189987	0.0609933	0.481275
p__Firmicutes__g__Jeotgalicoccus__s__psychrophilus_336703	correlation	0.180066	0.123474	0.512341	0.211751	0.0473772	-0.317474	-0.0912026	-0.234734	-0.514276	-0.0869721	0.812155
	significance (two tails)	0.575476	0.702232	0.0885589	0.508817	0.883756	0.314634	0.778027	0.462723	0.0871579	0.788111	0.0013311
p__Firmicutes__g__Granulicatella_521851	correlation	-0.0109609	-0.194128	0.524809	0.453023	-0.0971719	0.328914	0.215012	-0.672086	-0.421329	-0.421698	0.0746296
	significance (two tails)	0.97303	0.545469	0.0797931	0.139147	0.763851	0.296526	0.502157	0.0166625	0.172542	0.172127	0.817698
p__Firmicutes__g__Faecalibacterium__s__prausnitzii_851865	correlation	0.670203	-0.281546	0.641292	-0.0192685	0.0831022	0.0982733	0.28856	-0.787188	-0.258424	-0.322007	0.3061
	significance (two tails)	0.017085	0.375333	0.0246082	0.952605	0.797362	0.761243	0.363035	0.00237488	0.417367	0.307387	0.333228
p__Firmicutes__g__Faecalibacterium__s__prausnitzii_514523	correlation	0.464215	-0.304902	0.382608	-0.0853097	0.131186	0.167049	0.356737	-0.743377	-0.405414	-0.32727	0.00871562
	significance (two tails)	0.128438	0.335219	0.219633	0.792082	0.684454	0.603819	0.255004	0.00558939	0.191052	0.299091	0.978554
p__Firmicutes__g__Eubacterium__s__dolichum_851715	correlation	0.0323995	0.0549451	0.00617183	-0.313247	0.178683	0.069469	-0.120636	0.264703	-0.00721297	0.354212	-0.0581913
	significance (two tails)	0.920378	0.865326	0.984812	0.321476	0.578462	0.830136	0.708808	0.405728	0.982251	0.258624	0.85744
p__Firmicutes__g__Eubacterium__s__dolichum_587530	correlation	0.0223689	-0.0705152	0.329782	-0.00185785	0.100677	0.265687	0.0243343	-0.177141	-0.266788	0.0580558	-0.00623141
	significance (two tails)	0.944988	0.827612	0.295177	0.995428	0.755559	0.403919	0.940162	0.581798	0.401901	0.857769	0.984666
p__Firmicutes__g__Eubacterium__s__dolichum_579851	correlation
	significance (two tails)
p__Firmicutes__g__Eubacterium__s__dolichum_548587	correlation
	significance (two tails)
p__Firmicutes__g__Eubacterium__s__dolichum_493391	correlation
	significance (two tails)
p__Firmicutes__g__Eubacterium__s__biforme_197105	correlation
	significance (two tails)
p__Firmicutes__g__Epulopiscium_298247	correlation	0.273046	-0.261985	0.565745	-0.232664	-0.17762	-0.32383	0.152074	-0.197988	-0.325585	-0.178551	0.279455
	significance (two tails)	0.390522	0.410747	0.0552035	0.466793	0.580761	0.3045	0.637058	0.537348	0.301734	0.578747	0.37904
p__Firmicutes__g__Enterococcus_766768	correlation	0.168276	0.221787	0.0764575	0.247181	-0.0382387	0.0257297	0.181914	0.0841562	0.376259	0.0379593	0.338571
	significance (two tails)	0.601124	0.488445	0.813302	0.438612	0.90608	0.936737	0.571494	0.79484	0.228024	0.906764	0.281708
p__Firmicutes__g__Enterococcus_590982	correlation	0.272787	0.312639	0.109498	0.209754	-0.158278	-0.113904	0.0933462	-0.0115604	0.453537	0.146008	0.260277
	significance (two tails)	0.390989	0.322466	0.734793	0.512915	0.623209	0.724483	0.772929	0.971556	0.138644	0.650702	0.413914
p__Firmicutes__g__Enterococcus_4316928	correlation	0.162005	-0.155333	0.254572	-0.262841	-0.268926	-0.15622	-0.085851	-0.369128	-0.159487	0.118425	0.0170889
	significance (two tails)	0.614941	0.629769	0.424588	0.409163	0.397994	0.627791	0.790788	0.237673	0.620522	0.713945	0.957962
p__Firmicutes__g__Enterococcus_295146	correlation	0.366271	0.541125	-0.0964217	0.177472	0.214005	0.0461495	-0.239781	0.139342	0.62461	0.253772	0.204256
	significance (two tails)	0.241605	0.0692414	0.765629	0.581082	0.50421	0.886751	0.452873	0.665812	0.0299089	0.426094	0.524271
p__Firmicutes__g__Enterococcus_1111582	correlation	0.234402	0.0884844	0.0358181	0.149687	0.128644	-0.0802908	-0.113675	0.229003	0.554924	0.0662562	0.195371
	significance (two tails)	0.463375	0.784503	0.912004	0.642415	0.690298	0.804098	0.725016	0.474029	0.0611022	0.837898	0.542848
p__Firmicutes__g__Dorea__s__formicigenerans_1076587	correlation	0.42683	-0.356524	0.254034	-0.224511	-0.0459423	0.137338	0.474776	-0.615054	-0.357937	-0.360938	-0.0489612
	significance (two tails)	0.166418	0.255309	0.4256	0.482981	0.887257	0.670377	0.118838	0.0332914	0.253294	0.249048	0.879894
p__Firmicutes__g__Dorea_659361	correlation
	significance (two tails)
p__Firmicutes__g__Dorea_4383093	correlation	0.716926	-0.175132	0.196863	-0.258607	0.0919145	0.0578883	0.270185	-0.458555	-0.101285	-0.115375	0.341145
	significance (two tails)	0.00869127	0.586156	0.53971	0.417025	0.776333	0.858175	0.395704	0.133784	0.754122	0.721049	0.277831
p__Firmicutes__g__Dorea_364175	correlation
	significance (two tails)
p__Firmicutes__g__Dialister_246930	correlation	0.142654	-0.14976	0.505345	0.0420175	-0.3628	0.423638	0.399021	-0.293569	-0.151958	-0.0729794	0.15031
	significance (two tails)	0.65829	0.642251	0.0937516	0.896841	0.246434	0.169954	0.198819	0.354384	0.637317	0.821671	0.641016
p__Firmicutes__g__Dialister_128382	correlation
	significance (two tails)
p__Firmicutes__g__Clostridium__s__perfringens_828483	correlation	-0.490991	-0.353356	-0.424884	-0.529617	0.254039	0.0446496	0.040334	0.355307	-0.23777	-0.162748	-0.272888
	significance (two tails)	0.105039	0.259858	0.168569	0.076577	0.42559	0.890412	0.900956	0.25705	0.456787	0.613299	0.390806
p__Firmicutes__g__Clostridium__s__perfringens_315982	correlation	-0.426741	-0.403053	-0.526882	-0.373761	0.0826383	-0.339659	-0.00300773	0.249711	-0.0332971	-0.0225325	-0.0775319
	significance (two tails)	0.166515	0.193898	0.0783953	0.231376	0.798473	0.280065	0.992598	0.433786	0.918179	0.944586	0.81072
p__Firmicutes__g__Clostridium__s__perfringens_304779	correlation	-0.629189	-0.476467	-0.528123	-0.418296	0.179383	0.00306277	0.139911	0.239828	-0.287567	-0.465416	-0.292714
	significance (two tails)	0.028379	0.117346	0.0775663	0.175979	0.57695	0.992463	0.664516	0.452781	0.364763	0.127321	0.355852
p__Firmicutes__g__Clostridium__s__neonatale_523589	correlation	-0.490723	-0.65953	-0.54878	-0.52029	0.0276006	-0.151311	0.349858	0.108049	-0.30766	-0.408703	-0.179565
	significance (two tails)	0.105258	0.0196312	0.0646393	0.0828987	0.932146	0.638769	0.264936	0.738194	0.330643	0.18713	0.576557
p__Firmicutes__g__Clostridium__s__difficile_606927	correlation	0.395135	0.196322	0.0454042	-0.213179	-0.182128	0.177658	0.197396	0.264053	0.43573	0.549832	-0.025017
	significance (two tails)	0.203633	0.540846	0.88857	0.505896	0.571035	0.58068	0.538591	0.406926	0.156801	0.0640241	0.938486
p__Firmicutes__g__Clostridium__s__butyricum_541328	correlation	-0.629189	-0.476467	-0.528123	-0.418296	0.179383	0.00306277	0.139911	0.239828	-0.287567	-0.465416	-0.292714
	significance (two tails)	0.028379	0.117346	0.0775663	0.175979	0.57695	0.992463	0.664516	0.452781	0.364763	0.127321	0.355852
p__Firmicutes__g__Clostridium__s__butyricum_238205	correlation	-0.629189	-0.476467	-0.528123	-0.418296	0.179383	0.00306277	0.139911	0.239828	-0.287567	-0.465416	-0.292714
	significance (two tails)	0.028379	0.117346	0.0775663	0.175979	0.57695	0.992463	0.664516	0.452781	0.364763	0.127321	0.355852
p__Firmicutes__g__Clostridium_329073	correlation
	significance (two tails)
p__Firmicutes__g__Clostridium_2670715	correlation
	significance (two tails)
p__Firmicutes__g__Clostridium_193894	correlation
	significance (two tails)
p__Firmicutes__g__Butyricicoccus__s__pullicaecorum_1132942	correlation
	significance (two tails)
p__Firmicutes__g__Blautia__s__producta_696563	correlation	0.351701	-0.308503	0.41323	0.112926	-0.325924	0.205613	0.617255	-0.65875	-0.361037	-0.33635	0.153492
	significance (two tails)	0.262253	0.329251	0.181816	0.726767	0.301201	0.521458	0.0324891	0.0198276	0.248908	0.285078	0.633883
p__Firmicutes__g__Blautia__s__producta_589313	correlation	-0.0109609	-0.194128	0.524809	0.453023	-0.0971719	0.328914	0.215012	-0.672086	-0.421329	-0.421698	0.0746296
	significance (two tails)	0.97303	0.545469	0.0797931	0.139147	0.763851	0.296526	0.502157	0.0166625	0.172542	0.172127	0.817698
p__Firmicutes__g__Blautia__s__producta_587269	correlation
	significance (two tails)
p__Firmicutes__g__Blautia__s__producta_348362	correlation
	significance (two tails)
p__Firmicutes__g__Blautia_583089	correlation
	significance (two tails)
p__Firmicutes__g__Bacillus__s__flexus_656443	correlation
	significance (two tails)
p__Firmicutes__g__Bacillus_574051	correlation
	significance (two tails)
p__Firmicutes__g__Anaerotruncus_311961	correlation
	significance (two tails)
p__Firmicutes__f__Ruminococcaceae_580521	correlation
	significance (two tails)
p__Firmicutes__f__Ruminococcaceae_554303	correlation	-0.517716	-0.59974	-0.0926843	-0.296118	0.18904	-0.162908	0.0871956	-0.0566208	-0.493725	-0.690694	-0.105427
	significance (two tails)	0.0847038	0.0392702	0.774502	0.350023	0.556249	0.612946	0.787578	0.861254	0.102823	0.0128875	0.744359
p__Firmicutes__f__Ruminococcaceae_510295	correlation
	significance (two tails)
p__Firmicutes__f__Ruminococcaceae_367213	correlation	0.420059	-0.322689	0.459201	-0.0797555	0.0209105	0.114556	0.263316	-0.833904	-0.435134	-0.305066	0.0152504
	significance (two tails)	0.173976	0.306305	0.133166	0.805382	0.948571	0.72296	0.408285	0.000747962	0.157434	0.334946	0.962481
p__Firmicutes__f__Ruminococcaceae_359175	correlation	-0.0109609	-0.194128	0.524809	0.453023	-0.0971719	0.328914	0.215012	-0.672086	-0.421329	-0.421698	0.0746296
	significance (two tails)	0.97303	0.545469	0.0797931	0.139147	0.763851	0.296526	0.502157	0.0166625	0.172542	0.172127	0.817698
p__Firmicutes__f__Ruminococcaceae_350036	correlation
	significance (two tails)
p__Firmicutes__f__Ruminococcaceae_341724	correlation	0.0818841	-0.374083	0.402308	0.105377	-0.523502	0.339899	0.648596	-0.541002	-0.428555	-0.45296	0.0244216
	significance (two tails)	0.800279	0.230942	0.194802	0.744475	0.0806832	0.279704	0.0225164	0.0693173	0.164525	0.13921	0.939948
p__Firmicutes__f__Ruminococcaceae_309720	correlation	0.350937	-0.0485223	0.592553	0.194079	-0.2296	0.0299391	0.0759181	-0.48429	0.0574287	0.00858635	-0.176223
	significance (two tails)	0.263364	0.880964	0.0423243	0.545572	0.472846	0.92641	0.814599	0.110605	0.859291	0.978872	0.583788
p__Firmicutes__f__Ruminococcaceae_29495	correlation
	significance (two tails)
p__Firmicutes__f__Planococcaceae_934488	correlation	0.106817	0.248374	-0.0403589	0.0048659	-0.483782	0.0785838	0.367018	0.013232	0.0374731	0.403638	-0.252408
	significance (two tails)	0.741088	0.436333	0.900895	0.988026	0.111035	0.808194	0.240573	0.967444	0.907954	0.19319	0.428669
p__Firmicutes__f__Lachnospiraceae_583974	correlation	0.308972	0.177912	0.119392	0.109366	-0.0941036	0.299697	0.389908	0.223265	0.421099	0.141735	0.333137
	significance (two tails)	0.328477	0.58013	0.711698	0.735104	0.77113	0.343951	0.210221	0.485477	0.172802	0.660374	0.289994
p__Firmicutes__f__Lachnospiraceae_535601	correlation	0.164978	-0.128304	0.374943	0.379825	0.232644	0.385386	-0.114318	-0.45868	-0.5244	-0.342769	0.497888
	significance (two tails)	0.608377	0.691081	0.229786	0.223288	0.466833	0.216022	0.723515	0.133665	0.0800704	0.275401	0.0995088
p__Firmicutes__f__Lachnospiraceae_357312	correlation	-0.0907777	-0.230348	-0.117761	-0.462773	-0.00279188	0.151075	0.241789	0.230859	0.0139003	0.0279176	0.0182327
	significance (two tails)	0.779038	0.471365	0.715489	0.129786	0.993129	0.639298	0.448981	0.470355	0.965801	0.931368	0.95515
p__Firmicutes__f__Lachnospiraceae_338992	correlation	0.0743097	-0.235924	0.552952	0.229684	-0.216191	0.184522	0.128971	-0.73025	-0.420889	-0.27858	0.0688246
	significance (two tails)	0.818468	0.460391	0.0622229	0.472681	0.49976	0.565897	0.689545	0.0070008	0.173039	0.380597	0.831692
p__Firmicutes__f__Lachnospiraceae_2056188	correlation	-0.629189	-0.476467	-0.528123	-0.418296	0.179383	0.00306277	0.139911	0.239828	-0.287567	-0.465416	-0.292714
	significance (two tails)	0.028379	0.117346	0.0775663	0.175979	0.57695	0.992463	0.664516	0.452781	0.364763	0.127321	0.355852
p__Firmicutes__f__Gemellaceae_858896	correlation	0.283189	0.0108376	-0.0170906	-0.330762	0.278061	-0.580799	-0.397656	-0.256013	-0.339143	-0.023955	0.291504
	significance (two tails)	0.372433	0.973333	0.957958	0.293657	0.381523	0.0476755	0.200502	0.421878	0.280843	0.941093	0.357937
p__Firmicutes__f__Erysipelotrichaceae_592616	correlation	0.162005	-0.155333	0.254572	-0.262841	-0.268926	-0.15622	-0.085851	-0.369128	-0.159487	0.118425	0.0170889
	significance (two tails)	0.614941	0.629769	0.424588	0.409163	0.397994	0.627791	0.790788	0.237673	0.620522	0.713945	0.957962
p__Firmicutes__f__Erysipelotrichaceae_580008	correlation	0.464649	-0.335785	0.539265	-0.16748	-0.0124164	-0.0660913	0.413021	-0.665091	-0.342505	-0.419297	0.0403614
	significance (two tails)	0.128033	0.285939	0.0703928	0.602872	0.96945	0.838297	0.182058	0.0182724	0.275795	0.17484	0.900889
p__Firmicutes__f__Erysipelotrichaceae_364722	correlation
	significance (two tails)
p__Firmicutes__f__Erysipelotrichaceae_145801	correlation	0.412171	0.0674437	0.625025	0.255893	-0.451789	0.305638	0.0508491	-0.451308	0.0267745	0.148833	0.133351
	significance (two tails)	0.18305	0.835028	0.0297678	0.422105	0.140363	0.333994	0.875294	0.140838	0.934173	0.644336	0.679488
p__Firmicutes__f__Clostridiaceae_551822	correlation	0.46027	-0.369331	0.481444	-0.181839	-0.12192	0.128543	0.219539	-0.50796	-0.116815	-0.121544	0.0045593
	significance (two tails)	0.132149	0.237394	0.113027	0.571656	0.705831	0.69053	0.492975	0.0917871	0.717693	0.706701	0.98878
p__Firmicutes__f__Clostridiaceae_359750	correlation	-0.29567	-0.468461	-0.362863	-0.280474	0.348961	-0.268209	-0.213367	0.214193	-0.0422858	-0.286005	0.0828356
	significance (two tails)	0.350787	0.124519	0.246346	0.37723	0.266247	0.399302	0.505513	0.503826	0.896185	0.36749	0.798
p__Firmicutes__f__Clostridiaceae_338222	correlation
	significance (two tails)
p__Firmicutes__f__Clostridiaceae_325419	correlation	0.501053	-0.213715	0.0162243	-0.27035	0.196415	-0.109417	0.239252	-0.47515	-0.129457	-0.250288	-0.0397924
	significance (two tails)	0.0970367	0.504802	0.960087	0.395403	0.54065	0.734984	0.453901	0.118507	0.688427	0.432688	0.90228
p__Firmicutes__f__Clostridiaceae_303809	correlation	-0.294439	-0.505852	-0.471842	-0.500269	0.239902	0.0588162	0.0255312	0.184159	-0.162315	-0.349561	0.156189
	significance (two tails)	0.352891	0.0933691	0.121456	0.0976456	0.452637	0.855922	0.937224	0.566675	0.614257	0.265369	0.627859
p__Firmicutes__f__Clostridiaceae_2225203	correlation
	significance (two tails)
p__Firmicutes__f__Clostridiaceae_171681	correlation	-0.305716	-0.164243	-0.288607	-0.3694	-0.215218	0.319844	0.441873	0.423926	0.0853153	0.183092	-0.210584
	significance (two tails)	0.333866	0.609997	0.362952	0.2373	0.501739	0.310834	0.150375	0.169633	0.792069	0.568964	0.511211
p__Firmicutes__f__Clostridiaceae_171184	correlation	-0.47568	-0.340857	-0.412658	-0.529404	0.255268	0.0466478	0.0335527	0.357718	-0.231427	-0.141592	-0.267947
	significance (two tails)	0.118038	0.278264	0.182481	0.0767175	0.423277	0.885535	0.917553	0.253605	0.469231	0.660699	0.399782
p__Firmicutes__f__Clostridiaceae_1625448	correlation
	significance (two tails)
p__Firmicutes__f__Clostridiaceae_1104963	correlation	-0.0844044	0.776532	-0.230592	0.572968	-0.422545	0.130416	-0.197287	0.0828857	0.529805	0.646979	-0.330575
	significance (two tails)	0.794247	0.002974	0.470883	0.0514952	0.171177	0.686222	0.538819	0.79788	0.0764528	0.0229681	0.293946
p__Firmicutes__f__Bacillaceae_551871	correlation	0.385413	-0.253626	0.229978	-0.0654775	-0.312679	0.0863372	0.579329	-0.434817	-0.216347	-0.18946	0.135289
	significance (two tails)	0.215988	0.426369	0.472098	0.839782	0.322401	0.789627	0.0483771	0.157771	0.499443	0.555358	0.675054
p__Cyanobacteria__o__Streptophyta_1793401	correlation	-0.629189	-0.476467	-0.528123	-0.418296	0.179383	0.00306277	0.139911	0.239828	-0.287567	-0.465416	-0.292714
	significance (two tails)	0.028379	0.117346	0.0775663	0.175979	0.57695	0.992463	0.664516	0.452781	0.364763	0.127321	0.355852
p__Cyanobacteria__o__Streptophyta_153978	correlation
	significance (two tails)
p__Cyanobacteria__o__Streptophyta_1141758	correlation
	significance (two tails)
p__Bacteroidetes__g__Sphingobacterium__s__mizutaii_537775	correlation
	significance (two tails)
p__Bacteroidetes__g__Prevotella__s__stercorea_347138	correlation
	significance (two tails)
p__Bacteroidetes__g__Prevotella__s__copri_568118	correlation	0.363151	-0.12889	0.741036	0.0617059	-0.188768	-0.111851	0.382214	-0.389911	-0.442949	0.0490071	0.511386
	significance (two tails)	0.245943	0.689731	0.00582372	0.848914	0.556829	0.729283	0.220149	0.210217	0.149267	0.879782	0.0892559
p__Bacteroidetes__g__Prevotella__s__copri_545061	correlation	-0.051593	-0.298366	0.479254	0.128279	-0.409098	0.248175	0.245393	-0.585625	-0.42999	-0.331565	-0.016198
	significance (two tails)	0.873482	0.346203	0.114915	0.691138	0.186663	0.436713	0.442037	0.0454237	0.162962	0.292415	0.960152
p__Bacteroidetes__g__Prevotella__s__copri_336372	correlation	0.240539	-0.0653882	0.694469	0.278645	-0.130418	0.240141	0.231827	-0.529012	-0.361535	-0.143981	0.446922
	significance (two tails)	0.451401	0.839998	0.0122066	0.380481	0.686217	0.452174	0.468443	0.0769769	0.248208	0.655284	0.145221
p__Bacteroidetes__g__Prevotella__s__copri_326482	correlation	-0.240357	-0.212356	0.241129	-0.0191354	-0.53763	0.170859	0.341464	-0.0413505	-0.395641	-0.327452	0.101547
	significance (two tails)	0.451755	0.507579	0.450258	0.952932	0.0714161	0.59547	0.277353	0.898471	0.203003	0.298807	0.753503
p__Bacteroidetes__g__Prevotella__s__copri_174831	correlation	-0.0109609	-0.194128	0.524809	0.453023	-0.0971719	0.328914	0.215012	-0.672086	-0.421329	-0.421698	0.0746296
	significance (two tails)	0.97303	0.545469	0.0797931	0.139147	0.763851	0.296526	0.502157	0.0166625	0.172542	0.172127	0.817698
p__Bacteroidetes__g__Parabacteroides__s__distasonis_585914	correlation	0.294663	-0.105959	0.0863542	-0.173408	-0.0873782	0.367186	0.194902	0.0656486	-0.11409	0.0701682	0.0856783
	significance (two tails)	0.352508	0.743106	0.789586	0.589908	0.787142	0.240342	0.543836	0.839368	0.724048	0.828449	0.791201
p__Bacteroidetes__g__Parabacteroides__s__distasonis_578016	correlation	0.0813217	0.0675907	0.0686701	-0.0260736	-0.276267	0.52799	0.565749	0.252452	0.268045	0.214355	-0.182171
	significance (two tails)	0.801626	0.834673	0.832065	0.935893	0.384729	0.0776551	0.0552014	0.428588	0.399602	0.503497	0.570943
p__Bacteroidetes__g__Parabacteroides__s__distasonis_577294	correlation	-0.192249	0.147325	0.205566	0.424998	-0.413757	0.3736	0.550144	0.125825	0.141823	0.34189	-0.226603
	significance (two tails)	0.54944	0.647733	0.521556	0.168442	0.181202	0.231594	0.0638421	0.696797	0.660174	0.276715	0.478802
p__Bacteroidetes__g__Parabacteroides__s__distasonis_564140	correlation	-0.0957161	-0.0270776	-0.340452	-0.251713	-0.127266	0.265336	0.0934689	0.35396	0.0293585	0.115006	-0.289777
	significance (two tails)	0.767302	0.933429	0.278872	0.429985	0.693473	0.404565	0.772637	0.258986	0.927834	0.721909	0.360922
p__Bacteroidetes__g__Parabacteroides__s__distasonis_4365130	correlation	-0.407223	0.00503173	-0.0810547	0.116124	-0.463323	0.32329	0.297462	0.366239	-0.115135	0.262192	-0.279114
	significance (two tails)	0.188889	0.987618	0.802267	0.719303	0.12927	0.305353	0.347736	0.241649	0.72161	0.410363	0.379647
p__Bacteroidetes__g__Parabacteroides__s__distasonis_291090	correlation	-0.0694835	0.0103534	-0.182223	-0.450475	-0.406392	-0.174292	0.420952	0.42865	0.276942	0.434525	-0.390149
	significance (two tails)	0.830101	0.974525	0.570831	0.141664	0.189881	0.587984	0.172968	0.164422	0.383521	0.158082	0.209913
p__Bacteroidetes__g__Parabacteroides__s__distasonis_2497335	correlation	0.292314	0.0804002	0.360608	0.317352	-0.13608	0.442485	0.476011	-0.0996773	0.208159	-0.0609554	0.355643
	significance (two tails)	0.35654	0.803836	0.249513	0.314831	0.673247	0.149745	0.117747	0.757921	0.516199	0.850733	0.256569
p__Bacteroidetes__g__Parabacteroides__s__distasonis_2309802	correlation	0.144311	0.038309	0.15701	0.0638864	-0.38654	0.447369	0.583674	0.233656	0.295377	-0.0221235	0.233925
	significance (two tails)	0.654538	0.905908	0.626029	0.843632	0.214532	0.144771	0.0463252	0.464841	0.351288	0.945591	0.464312
p__Bacteroidetes__g__Parabacteroides__s__distasonis_198190	correlation	0.308972	0.177912	0.119392	0.109366	-0.0941036	0.299697	0.389908	0.223265	0.421099	0.141735	0.333137
	significance (two tails)	0.328477	0.58013	0.711698	0.735104	0.77113	0.343951	0.210221	0.485477	0.172802	0.660374	0.289994
p__Bacteroidetes__g__Parabacteroides__s__distasonis_186233	correlation	-0.0955594	-0.0604037	-0.284704	-0.253105	-0.168576	0.144735	0.159726	0.350978	-0.0682343	0.139228	-0.184548
	significance (two tails)	0.767674	0.852071	0.369769	0.427353	0.600468	0.653579	0.619991	0.263303	0.833118	0.666072	0.565841
p__Bacteroidetes__g__Parabacteroides__s__distasonis_174842	correlation	0.133947	-0.142637	-0.0147581	-0.181136	-0.0044329	0.215169	0.0687898	0.121045	-0.040583	0.0397422	-0.192373
	significance (two tails)	0.678125	0.65833	0.963692	0.573169	0.989091	0.501837	0.831776	0.707859	0.900347	0.902403	0.549177
p__Bacteroidetes__g__Parabacteroides_198866	correlation	-0.178102	0.247994	-0.129489	-0.0363923	-0.820206	0.0219244	0.419118	0.342757	0.304187	0.567924	-0.357506
	significance (two tails)	0.579719	0.437057	0.688353	0.910599	0.00108479	0.94608	0.175045	0.275418	0.336412	0.0540657	0.253908
p__Bacteroidetes__g__Parabacteroides_180082	correlation	-0.264782	-0.102725	-0.284771	-0.378155	-0.434287	0.0380833	0.195021	0.473659	0.0792224	0.00764824	-0.210293
	significance (two tails)	0.405584	0.750723	0.369651	0.225498	0.158337	0.90646	0.543586	0.11983	0.806661	0.98118	0.511809
p__Bacteroidetes__g__Myroides__s__odoratimimus_579933	correlation	0.0323995	0.0549451	0.00617183	-0.313247	0.178683	0.069469	-0.120636	0.264703	-0.00721297	0.354212	-0.0581913
	significance (two tails)	0.920378	0.865326	0.984812	0.321476	0.578462	0.830136	0.708808	0.405728	0.982251	0.258624	0.85744
p__Bacteroidetes__g__Dysgonomonas_606755	correlation
	significance (two tails)
p__Bacteroidetes__g__Dysgonomonas_364538	correlation
	significance (two tails)
p__Bacteroidetes__g__Butyricimonas_208479	correlation	-0.214637	-0.296271	0.371107	0.219217	-0.44088	0.398075	0.390229	-0.391976	-0.412102	-0.467211	-0.0769832
	significance (two tails)	0.50292	0.349763	0.23497	0.493627	0.151402	0.199985	0.209812	0.207599	0.183131	0.125664	0.812038
p__Bacteroidetes__g__Bacteroides__s__uniformis_589071	correlation	0.599624	0.122928	0.328361	0.276053	0.261801	0.450569	-0.00159843	-0.4307	-0.0807519	0.0806004	0.272678
	significance (two tails)	0.0393184	0.703495	0.297388	0.385112	0.411088	0.141571	0.996066	0.162192	0.802992	0.803356	0.391185
p__Bacteroidetes__g__Bacteroides__s__uniformis_572476	correlation	0.374354	-0.163998	0.042501	-0.131727	0.583629	-0.0995384	-0.124708	-0.616306	-0.182506	-0.398863	-0.166209
	significance (two tails)	0.230578	0.610539	0.895659	0.683211	0.0463459	0.758249	0.699377	0.0328334	0.570222	0.199013	0.605666
p__Bacteroidetes__g__Bacteroides__s__uniformis_350277	correlation	0.466283	-0.00715025	-0.0939819	-0.0347601	0.556583	0.34449	-0.302767	-0.25519	-0.099034	-0.183386	0.212176
	significance (two tails)	0.126519	0.982405	0.771419	0.914595	0.0601707	0.272839	0.338786	0.423424	0.759443	0.568332	0.507947
p__Bacteroidetes__g__Bacteroides__s__uniformis_197072	correlation	0.177025	-0.0199203	0.09184	0.239385	0.284537	0.395711	-0.0327427	-0.334906	-0.235322	-0.0764564	-0.0467337
	significance (two tails)	0.582051	0.951003	0.77651	0.453642	0.370062	0.202915	0.919537	0.287281	0.46157	0.813304	0.885325
p__Bacteroidetes__g__Bacteroides__s__plebeius_365496	correlation	0.414996	-0.0195949	0.404213	-0.0186294	0.140483	-0.023166	0.00976574	-0.210123	-0.539074	-0.00784347	0.785679
	significance (two tails)	0.179768	0.951803	0.192497	0.954176	0.663217	0.943031	0.97597	0.512157	0.0705117	0.980699	0.00245358
p__Bacteroidetes__g__Bacteroides__s__plebeius_340476	correlation	0.142043	-0.401099	0.140958	-0.453279	0.0860677	-0.0512006	-0.12718	0.00736302	-0.433233	-0.234658	0.454063
	significance (two tails)	0.659677	0.196274	0.662137	0.138896	0.790271	0.874438	0.693669	0.981881	0.159463	0.462873	0.138129
p__Bacteroidetes__g__Bacteroides__s__plebeius_187388	correlation
	significance (two tails)
p__Bacteroidetes__g__Bacteroides__s__ovatus_535375	correlation	0.133438	-0.2412	0.115723	-0.0920905	-0.0424456	0.354368	0.14198	-0.492048	-0.314808	-0.213716	-0.34633
	significance (two tails)	0.67929	0.450121	0.720236	0.775914	0.895794	0.258399	0.659818	0.104179	0.318939	0.504799	0.270115
p__Bacteroidetes__g__Bacteroides__s__ovatus_308598	correlation	0.342917	-0.269569	0.236911	-0.260159	0.0601521	0.0764684	0.0382591	-0.653463	-0.387738	-0.446494	-0.0285343
	significance (two tails)	0.275179	0.396824	0.458461	0.414135	0.852681	0.813276	0.90603	0.0211966	0.212993	0.145654	0.929855
p__Bacteroidetes__g__Bacteroides__s__ovatus_187443	correlation	0.146469	-0.0800014	0.0672618	-0.20363	-0.33725	0.346534	0.49911	-2.56985e-05	-0.125163	0.166213	-0.221013
	significance (two tails)	0.649663	0.804792	0.835467	0.525571	0.283709	0.269814	0.0985496	0.999937	0.698326	0.605658	0.490004
p__Bacteroidetes__g__Bacteroides__s__fragilis_4386507	correlation	0.155017	0.328262	-0.247431	-0.126307	0.445675	-0.439585	-0.548943	0.00482893	0.239512	-0.0510038	-0.19404
	significance (two tails)	0.630474	0.297542	0.438133	0.695684	0.146483	0.152749	0.0645441	0.988117	0.453395	0.874917	0.545654
p__Bacteroidetes__g__Bacteroides__s__fragilis_351231	correlation	0.302202	-0.385066	0.0681004	-0.398687	0.55368	-0.178575	0.0970972	-0.205778	-0.0802058	-0.637392	-0.0235993
	significance (two tails)	0.339733	0.216436	0.833441	0.19923	0.0618076	0.578695	0.764028	0.521117	0.804302	0.025781	0.941967
p__Bacteroidetes__g__Bacteroides__s__fragilis_3474081	correlation	0.20611	-0.114329	0.0993008	-0.186248	0.550087	-0.509303	-0.0745084	-0.20979	-0.192448	-0.40484	-0.126174
	significance (two tails)	0.52043	0.72349	0.758811	0.562203	0.0638754	0.0907897	0.81799	0.512841	0.549019	0.191742	0.69599
p__Bacteroidetes__g__Bacteroides__s__fragilis_2200896	correlation	0.0662082	0.357201	-0.446378	-0.233055	0.203555	-0.251058	-0.534454	0.187941	0.379811	0.111047	-0.249841
	significance (two tails)	0.838014	0.254342	0.145771	0.466023	0.525727	0.431228	0.073432	0.55859	0.223306	0.731164	0.433538
p__Bacteroidetes__g__Bacteroides__s__fragilis_183603	correlation	0.321309	-0.159294	0.0995051	-0.32868	0.537847	-0.532618	-0.149961	-0.362364	-0.198476	-0.345348	-0.152948
	significance (two tails)	0.308498	0.620951	0.758328	0.296891	0.0712794	0.0746148	0.6418	0.247044	0.536324	0.271567	0.6351
p__Bacteroidetes__g__Bacteroides__s__eggerthii_192111	correlation	0.0323995	0.0549451	0.00617183	-0.313247	0.178683	0.069469	-0.120636	0.264703	-0.00721297	0.354212	-0.0581913
	significance (two tails)	0.920378	0.865326	0.984812	0.321476	0.578462	0.830136	0.708808	0.405728	0.982251	0.258624	0.85744
p__Bacteroidetes__g__Bacteroides__s__coprophilus_522595	correlation	0.211781	-0.107891	0.686137	0.32407	-0.506419	0.604545	0.581149	-0.448663	-0.301074	-0.110996	0.161571
	significance (two tails)	0.508756	0.738566	0.0137465	0.304121	0.0929413	0.0373182	0.0475098	0.143471	0.341628	0.731283	0.615902
p__Bacteroidetes__g__Bacteroides__s__coprophilus_2730944	correlation	0.241518	-0.202718	0.584972	0.359141	-0.360498	0.592418	0.358575	-0.717402	-0.304746	-0.343239	0.0600639
	significance (two tails)	0.449505	0.527468	0.045724	0.251585	0.249668	0.0423834	0.252387	0.00862603	0.33548	0.2747	0.852895
p__Bacteroidetes__g__Bacteroides__s__caccae_187324	correlation	0.148176	-0.195045	0.424185	0.0312787	-0.560961	0.606713	0.597986	-0.188537	-0.134102	-0.19973	0.0374591
	significance (two tails)	0.645814	0.543534	0.169345	0.923125	0.0577599	0.0364603	0.0400005	0.55732	0.677769	0.5337	0.907988
p__Bacteroidetes__g__Bacteroides_589277	correlation	0.267258	-0.0367875	-0.0952997	0.0444748	0.472523	0.197173	-0.249074	-0.0728749	0.192649	-0.0361548	-0.235325
	significance (two tails)	0.40104	0.909631	0.76829	0.890838	0.120845	0.539058	0.434997	0.821923	0.548594	0.91118	0.461566
p__Bacteroidetes__g__Bacteroides_583117	correlation	0.194124	-0.0730416	0.0158782	-0.0600022	0.624736	-0.256031	-0.181063	-0.233687	-0.327836	-0.172714	-0.0338244
	significance (two tails)	0.545476	0.821522	0.960938	0.853045	0.0298662	0.421846	0.573327	0.46478	0.298207	0.59142	0.916887
p__Bacteroidetes__g__Bacteroides_580629	correlation	0.0128193	-0.128421	0.45316	0.172934	0.0392849	0.32895	0.101284	-0.393579	-0.365355	-0.118074	0.0239755
	significance (two tails)	0.968459	0.690812	0.139013	0.59094	0.903521	0.29647	0.754125	0.20558	0.242873	0.714761	0.941043
p__Bacteroidetes__g__Bacteroides_577170	correlation	0.183987	-0.0724177	-0.0174581	-0.0126079	0.385889	0.173405	-0.0912514	-0.111539	-0.27947	-0.195847	0.00231896
	significance (two tails)	0.567043	0.823025	0.957054	0.968979	0.215372	0.589913	0.77791	0.730011	0.379013	0.541846	0.994293
p__Bacteroidetes__g__Bacteroides_572010	correlation
	significance (two tails)
p__Bacteroidetes__g__Bacteroides_560336	correlation	0.201804	0.0712551	-0.0931881	0.127875	0.260629	0.430166	-0.083075	-0.0934225	-0.0364101	0.0866402	-0.0813878
	significance (two tails)	0.529371	0.825827	0.773305	0.692069	0.41326	0.162771	0.797427	0.772748	0.910555	0.788904	0.801468
p__Bacteroidetes__g__Bacteroides_550814	correlation	0.431228	-0.0378222	-0.169693	-0.222158	0.731378	-0.0688669	-0.407562	-0.179417	-0.167706	-0.169366	0.23507
	significance (two tails)	0.16162	0.907099	0.59802	0.4877	0.00687005	0.83159	0.188486	0.576875	0.602376	0.598735	0.462064
p__Bacteroidetes__g__Bacteroides_538296	correlation
	significance (two tails)
p__Bacteroidetes__g__Bacteroides_513445	correlation	0.288924	0.557027	0.171186	0.481778	0.0121297	0.343823	-0.0210217	-0.0628722	-0.0296948	0.333301	0.272725
	significance (two tails)	0.362402	0.0599234	0.594754	0.112741	0.970156	0.27383	0.948297	0.846088	0.927009	0.289741	0.391101
p__Bacteroidetes__g__Bacteroides_4457872	correlation	-0.0109609	-0.194128	0.524809	0.453023	-0.0971719	0.328914	0.215012	-0.672086	-0.421329	-0.421698	0.0746296
	significance (two tails)	0.97303	0.545469	0.0797931	0.139147	0.763851	0.296526	0.502157	0.0166625	0.172542	0.172127	0.817698
p__Bacteroidetes__g__Bacteroides_4455163	correlation	-0.0109609	-0.194128	0.524809	0.453023	-0.0971719	0.328914	0.215012	-0.672086	-0.421329	-0.421698	0.0746296
	significance (two tails)	0.97303	0.545469	0.0797931	0.139147	0.763851	0.296526	0.502157	0.0166625	0.172542	0.172127	0.817698
p__Bacteroidetes__g__Bacteroides_4369878	correlation	0.453832	0.00704373	-0.0541323	0.0518186	0.442814	0.510734	-0.235654	-0.275035	-0.0605536	-0.17888	0.186122
	significance (two tails)	0.138355	0.982667	0.867303	0.872933	0.149406	0.0897341	0.460921	0.386938	0.851708	0.578035	0.562473
p__Bacteroidetes__g__Bacteroides_4357712	correlation	0.422452	-0.0341869	-0.161089	-0.205057	0.717524	-0.0515173	-0.409586	-0.165378	-0.177957	-0.162425	0.263021
	significance (two tails)	0.171281	0.915999	0.616969	0.522609	0.00860943	0.873667	0.186087	0.607497	0.580032	0.614012	0.408829
p__Bacteroidetes__g__Bacteroides_4029632	correlation	-0.163437	0.106598	-0.0619655	-0.0538715	0.107811	-0.0224161	-0.0846425	0.374093	-0.133895	0.455376	-0.024728
	significance (two tails)	0.611777	0.741603	0.848285	0.867937	0.738752	0.944872	0.793677	0.230929	0.678243	0.13685	0.939195
p__Bacteroidetes__g__Bacteroides_4015273	correlation	0.331024	-0.273576	0.747911	0.0210217	0.00576876	-0.152977	0.2945	-0.605663	-0.397835	-0.304783	0.113268
	significance (two tails)	0.293252	0.389565	0.00515564	0.948297	0.985804	0.635035	0.352788	0.0368739	0.200281	0.335419	0.725967
p__Bacteroidetes__g__Bacteroides_364926	correlation	-0.836604	-0.216874	-0.321946	-0.186205	-0.465506	-0.0914399	0.452418	0.510152	-0.176141	0.124729	-0.636406
	significance (two tails)	0.000692428	0.498371	0.307484	0.562294	0.127238	0.777462	0.139742	0.0901626	0.583965	0.699327	0.0260839
p__Bacteroidetes__g__Bacteroides_364903	correlation
	significance (two tails)
p__Bacteroidetes__g__Bacteroides_364029	correlation	0.230257	0.0648164	0.220725	0.214111	-0.0251773	0.397612	-0.0103756	-0.278338	-0.0117748	0.0368503	-0.311107
	significance (two tails)	0.471546	0.841381	0.490583	0.503993	0.938093	0.200557	0.97447	0.381029	0.971028	0.909478	0.32497
p__Bacteroidetes__g__Bacteroides_359538	correlation	-0.147428	-0.0564559	0.290582	0.0225099	-0.349645	-0.0130277	0.308544	0.272923	-0.184515	0.380846	0.0120844
	significance (two tails)	0.647499	0.861654	0.359529	0.944642	0.265246	0.967947	0.329183	0.390744	0.565911	0.221943	0.970267
p__Bacteroidetes__g__Bacteroides_357582	correlation	0.545244	-0.0166396	0.316494	0.097431	0.498457	0.413615	0.0491751	-0.332965	-0.138652	-0.177843	0.452522
	significance (two tails)	0.0667383	0.959066	0.316214	0.763237	0.0990609	0.181367	0.879373	0.290258	0.667383	0.580279	0.13964
p__Bacteroidetes__g__Bacteroides_356827	correlation
	significance (two tails)
p__Bacteroidetes__g__Bacteroides_356052	correlation	0.364087	-0.0781055	0.111938	-0.224376	0.218862	0.211548	-0.0138785	-6.06878e-05	-0.291312	0.134274	0.391002
	significance (two tails)	0.244637	0.809342	0.729077	0.483251	0.494345	0.509234	0.965855	0.999851	0.358267	0.677375	0.208831
p__Bacteroidetes__g__Bacteroides_352825	correlation
	significance (two tails)
p__Bacteroidetes__g__Bacteroides_348304	correlation	0.477196	-0.0228633	-0.106773	-0.069347	0.415855	0.405027	-0.0978664	-0.427879	0.119023	-0.23153	-0.217517
	significance (two tails)	0.116707	0.943774	0.741192	0.830431	0.178776	0.191517	0.762206	0.165265	0.712554	0.469028	0.497068
p__Bacteroidetes__g__Bacteroides_3472078	correlation	0.39458	-0.0718731	-0.22225	-0.366861	0.655816	-0.270408	-0.238742	-0.299264	0.0242307	-0.200413	-0.210604
	significance (two tails)	0.204326	0.824337	0.487514	0.24079	0.0205791	0.395298	0.454893	0.344682	0.940416	0.532272	0.511169
p__Bacteroidetes__g__Bacteroides_339013	correlation	0.080495	-0.210231	0.534308	0.128862	-0.152958	0.200325	0.0886623	-0.62284	-0.40769	-0.162726	0.0487614
	significance (two tails)	0.803608	0.511935	0.0735258	0.689796	0.635077	0.532455	0.784078	0.0305159	0.188333	0.613348	0.880381
p__Bacteroidetes__g__Bacteroides_327050	correlation	-0.264782	-0.102725	-0.284771	-0.378155	-0.434287	0.0380833	0.195021	0.473659	0.0792224	0.00764824	-0.210293
	significance (two tails)	0.405584	0.750723	0.369651	0.225498	0.158337	0.90646	0.543586	0.11983	0.806661	0.98118	0.511809
p__Bacteroidetes__g__Bacteroides_3154070	correlation	0.41162	-0.0302015	-0.151371	-0.186153	0.700244	-0.0328947	-0.410278	-0.149867	-0.188217	-0.15447	0.291791
	significance (two tails)	0.183695	0.925766	0.638634	0.562407	0.0112167	0.919165	0.185271	0.64201	0.558002	0.631697	0.357442
p__Bacteroidetes__g__Bacteroides_313764	correlation	0.451955	-0.0508352	-0.197971	-0.281978	0.762504	-0.134481	-0.386841	-0.228625	-0.122388	-0.191158	0.118484
	significance (two tails)	0.140199	0.875328	0.537384	0.374568	0.00393026	0.676902	0.214145	0.474779	0.704745	0.551752	0.713808
p__Bacteroidetes__g__Bacteroides_312140	correlation	0.0432043	0.0265096	-0.239559	-0.057981	0.0301361	0.419213	0.0366557	0.148589	0.0153164	0.118918	-0.241126
	significance (two tails)	0.893941	0.934823	0.453304	0.85795	0.925927	0.174936	0.909954	0.644886	0.962319	0.712799	0.450264
p__Bacteroidetes__g__Bacteroides_305946	correlation	0.252652	-0.0922724	-0.208137	-0.227475	0.492837	0.0659192	-0.16	-0.159128	-0.177968	-0.141709	-0.145271
	significance (two tails)	0.428209	0.775482	0.516245	0.477066	0.103539	0.838713	0.619383	0.62132	0.580007	0.660432	0.652366
p__Bacteroidetes__g__Bacteroides_297057	correlation	-0.372944	0.0880535	0.0637479	0.214161	-0.467204	0.182152	0.545034	0.478868	-0.0179425	0.404912	-0.12371
	significance (two tails)	0.232479	0.78553	0.843967	0.503891	0.125671	0.570983	0.0668644	0.115249	0.955864	0.191656	0.701685
p__Bacteroidetes__g__Bacteroides_2740953	correlation
	significance (two tails)
p__Bacteroidetes__g__Bacteroides_270094	correlation
	significance (two tails)
p__Bacteroidetes__g__Bacteroides_2563561	correlation	0.0471906	-0.13772	-0.154654	-0.210241	0.656138	-0.184903	-0.206417	-0.0415285	-0.358217	-0.134949	-0.0402862
	significance (two tails)	0.884211	0.669506	0.631285	0.511914	0.0204956	0.565079	0.519795	0.898036	0.252896	0.675832	0.901072
p__Bacteroidetes__g__Bacteroides_2189140	correlation
	significance (two tails)
p__Bacteroidetes__g__Bacteroides_209685	correlation	-0.0901551	-0.0988666	-0.191155	-0.268441	0.0969227	0.258815	0.324917	0.406884	0.163898	0.000179206	0.0733014
	significance (two tails)	0.780521	0.759839	0.551757	0.398879	0.764442	0.416638	0.302785	0.189293	0.610758	0.999559	0.820896
p__Bacteroidetes__g__Bacteroides_2061739	correlation	0.453442	-0.0576422	-0.210556	-0.312053	0.762624	-0.171876	-0.364205	-0.253448	-0.0911318	-0.199883	0.0430244
	significance (two tails)	0.138737	0.858773	0.511268	0.323423	0.00392121	0.593247	0.244472	0.426705	0.778195	0.53338	0.894381
p__Bacteroidetes__g__Bacteroides_205904	correlation	0.025064	0.375237	0.00445954	0.167931	-0.150332	0.366534	-0.0680223	0.0957846	-0.079856	0.423617	-0.0860867
	significance (two tails)	0.938371	0.229392	0.989026	0.601883	0.640967	0.241241	0.83363	0.76714	0.805141	0.169979	0.790225
p__Bacteroidetes__g__Bacteroides_199716	correlation	0.190641	0.0597401	0.131535	0.374762	-0.239501	0.948895	0.166113	-0.241853	0.144014	-0.080837	-0.0469201
	significance (two tails)	0.552849	0.853681	0.683653	0.230029	0.453417	2.51897e-06	0.605878	0.448858	0.65521	0.802788	0.884871
p__Bacteroidetes__g__Bacteroides_198449	correlation	0.456294	0.00668791	-0.0548514	0.050932	0.442659	0.513578	-0.23297	-0.279756	-0.0566188	-0.180737	0.178439
	significance (two tails)	0.135959	0.983542	0.865554	0.875092	0.149566	0.087661	0.46619	0.378506	0.861259	0.574028	0.578989
p__Bacteroidetes__g__Bacteroides_194909	correlation	-0.447679	0.012303	0.170134	0.314959	-0.3158	-0.0655425	0.335676	0.012108	-0.187937	0.262187	-0.403218
	significance (two tails)	0.144459	0.969729	0.597054	0.318695	0.317334	0.839624	0.286105	0.970209	0.558599	0.410372	0.193699
p__Bacteroidetes__g__Bacteroides_193591	correlation	0.365566	0.245062	0.0582181	0.318997	0.225355	0.60254	-0.197971	-0.427566	0.0330083	0.0315184	-0.0659235
	significance (two tails)	0.242581	0.442673	0.857374	0.312189	0.481292	0.0381243	0.537384	0.165608	0.918886	0.922538	0.838703
p__Bacteroidetes__g__Bacteroides_193233	correlation	0.228263	-0.00732393	-0.0200685	0.0960556	0.436348	0.231668	-0.148591	-0.241819	-0.217006	-0.0431321	-0.00129676
	significance (two tails)	0.475499	0.981978	0.950639	0.766497	0.156148	0.468757	0.644879	0.448924	0.498103	0.894117	0.996809
p__Bacteroidetes__g__Bacteroides_192839	correlation	0.118369	0.175569	-0.0977517	-0.0496105	0.0907807	-0.0949043	0.337986	0.258923	0.345099	0.350104	-0.199049
	significance (two tails)	0.714074	0.585208	0.762478	0.878311	0.779031	0.769229	0.282593	0.416435	0.271936	0.264577	0.535125
p__Bacteroidetes__g__Bacteroides_192684	correlation	-0.0453749	-0.15606	0.0120403	-0.230435	0.208026	-0.084647	0.125876	-0.204771	-0.238034	-0.0310588	-0.509576
	significance (two tails)	0.888641	0.628147	0.970375	0.471192	0.516473	0.793666	0.69668	0.523203	0.45627	0.923664	0.0905874
p__Bacteroidetes__g__Bacteroides_192055	correlation	0.31947	0.0913425	0.344827	0.426614	-0.2204	0.797551	0.451607	-0.193022	0.231423	-0.0861519	0.256092
	significance (two tails)	0.311433	0.777694	0.272338	0.166655	0.491238	0.0018853	0.140542	0.547805	0.469241	0.79007	0.421732
p__Bacteroidetes__g__Bacteroides_190638	correlation	0.233013	-0.029202	-0.122163	-0.018581	-0.104234	0.732181	0.125345	-0.135389	0.176545	-0.163528	-0.240282
	significance (two tails)	0.466105	0.928217	0.705268	0.954294	0.747167	0.006778	0.697906	0.674826	0.583089	0.611575	0.4519
p__Bacteroidetes__g__Bacteroides_189384	correlation	0.190641	0.0597401	0.131535	0.374762	-0.239501	0.948895	0.166113	-0.241853	0.144014	-0.080837	-0.0469201
	significance (two tails)	0.552849	0.853681	0.683653	0.230029	0.453417	2.51897e-06	0.605878	0.448858	0.65521	0.802788	0.884871
p__Bacteroidetes__g__Bacteroides_187841	correlation	-0.248145	-0.00196493	0.200777	0.360597	-0.0438155	0.0964022	0.099923	-0.0441232	-0.379465	0.146592	0.011106
	significance (two tails)	0.43677	0.995164	0.531513	0.249528	0.892448	0.765675	0.75734	0.891697	0.223764	0.649386	0.972673
p__Bacteroidetes__g__Bacteroides_186841	correlation	0.259307	-0.0180932	0.0935807	-0.149473	0.0794127	-0.0146579	0.427448	-0.0772274	0.0310749	0.21416	-0.187444
	significance (two tails)	0.41572	0.955493	0.772372	0.642896	0.806204	0.963938	0.165738	0.811451	0.923625	0.503894	0.55965
p__Bacteroidetes__g__Bacteroides_184753	correlation	0.202804	0.0179395	-0.015592	0.052352	0.356815	0.166446	-0.320319	0.0451395	-0.249222	-0.0360872	0.518679
	significance (two tails)	0.527289	0.955871	0.961641	0.871635	0.254892	0.605145	0.310074	0.889216	0.434716	0.911346	0.084025
p__Bacteroidetes__g__Bacteroides_183496	correlation	0.190641	0.0597401	0.131535	0.374762	-0.239501	0.948895	0.166113	-0.241853	0.144014	-0.080837	-0.0469201
	significance (two tails)	0.552849	0.853681	0.683653	0.230029	0.453417	2.51897e-06	0.605878	0.448858	0.65521	0.802788	0.884871
p__Bacteroidetes__g__Bacteroides_183480	correlation	0.385413	-0.253626	0.229978	-0.0654775	-0.312679	0.0863372	0.579329	-0.434817	-0.216347	-0.18946	0.135289
	significance (two tails)	0.215988	0.426369	0.472098	0.839782	0.322401	0.789627	0.0483771	0.157771	0.499443	0.555358	0.675054
p__Bacteroidetes__g__Bacteroides_182157	correlation	0.0699261	-0.0742146	0.0656936	0.189265	0.0684369	0.479231	0.155032	-0.330755	-0.186349	-0.112849	-0.307533
	significance (two tails)	0.829033	0.818697	0.839259	0.555772	0.832628	0.114934	0.630442	0.293668	0.561988	0.726948	0.330853
p__Bacteroidetes__g__Bacteroides_175535	correlation	0.523333	-0.155028	0.184555	0.0128968	0.508633	0.315946	-0.264171	-0.673587	-0.342555	-0.345825	0.222125
	significance (two tails)	0.0807985	0.63045	0.565825	0.968269	0.0912862	0.317098	0.406708	0.0163309	0.275721	0.270861	0.487766
p__Bacteroidetes__g__Bacteroides_175485	correlation	0.0155138	-0.0697912	-0.140142	-0.0659413	0.00501674	0.294609	0.221891	-0.169344	0.0127955	-0.0341213	-0.611264
	significance (two tails)	0.961834	0.829359	0.663992	0.83866	0.987655	0.352601	0.488235	0.598784	0.968518	0.91616	0.0347056
p__Bacteroidetes__g__Bacteroides_161423	correlation
	significance (two tails)
p__Bacteroidetes__g__Bacteroides_161007	correlation	0.148229	0.465743	-0.382527	-0.0559896	0.130447	0.117645	-0.406621	0.271193	0.229598	0.465881	-0.0956827
	significance (two tails)	0.645695	0.127018	0.219739	0.862787	0.68615	0.71576	0.189607	0.393874	0.47285	0.126891	0.767382
p__Bacteroidetes__f__Rikenellaceae_357046	correlation	0.0115422	-0.134468	0.464568	0.192956	0.0314296	0.334005	0.109891	-0.416894	-0.374441	-0.138711	0.0274841
	significance (two tails)	0.9716	0.676932	0.128109	0.547945	0.922756	0.288661	0.733873	0.177582	0.23046	0.667247	0.932431
p__Bacteroidetes__f__Rikenellaceae_199534	correlation
	significance (two tails)
p__Bacteroidetes__f__Cytophagaceae_555506	correlation
	significance (two tails)
p__Bacteroidetes__f__Barnesiellaceae_190975	correlation
	significance (two tails)
p__Bacteroidetes__f__Barnesiellaceae_183395	correlation	-0.488486	0.117543	-0.0931668	0.1052	-0.29669	-0.248513	0.255534	0.373278	0.0180938	0.515348	-0.485224
	significance (two tails)	0.107097	0.715997	0.773355	0.744892	0.349048	0.436067	0.422778	0.232028	0.955492	0.0863881	0.109818
p__Bacteroidetes__f__Barnesiellaceae_180133	correlation	0.162005	-0.155333	0.254572	-0.262841	-0.268926	-0.15622	-0.085851	-0.369128	-0.159487	0.118425	0.0170889
	significance (two tails)	0.614941	0.629769	0.424588	0.409163	0.397994	0.627791	0.790788	0.237673	0.620522	0.713945	0.957962
p__Actinobacteria__g__Rothia__s__mucilaginosa_903426	correlation	-0.426741	-0.403053	-0.526882	-0.373761	0.0826383	-0.339659	-0.00300773	0.249711	-0.0332971	-0.0225325	-0.0775319
	significance (two tails)	0.166515	0.193898	0.0783953	0.231376	0.798473	0.280065	0.992598	0.433786	0.918179	0.944586	0.81072
p__Actinobacteria__g__Rothia__s__mucilaginosa_866280	correlation	0.019038	0.316888	0.114512	0.308179	0.283348	-0.357382	-0.554106	0.0752685	0.341433	-0.0970226	-0.0494648
	significance (two tails)	0.953171	0.315578	0.723063	0.329786	0.372153	0.254084	0.0615655	0.816161	0.277398	0.764205	0.878667
p__Actinobacteria__g__Eggerthella__s__lenta_682726	correlation	-0.426741	-0.403053	-0.526882	-0.373761	0.0826383	-0.339659	-0.00300773	0.249711	-0.0332971	-0.0225325	-0.0775319
	significance (two tails)	0.166515	0.193898	0.0783953	0.231376	0.798473	0.280065	0.992598	0.433786	0.918179	0.944586	0.81072
p__Actinobacteria__g__Collinsella__s__stercoris_329688	correlation
	significance (two tails)
p__Actinobacteria__g__Collinsella__s__aerofaciens_363794	correlation	0.0742242	-0.038132	0.0110507	-0.117712	-0.575359	0.447327	0.301777	-0.131755	0.019158	0.0256854	-0.270726
	significance (two tails)	0.818674	0.906341	0.972809	0.715603	0.0503069	0.144813	0.340447	0.683148	0.952877	0.936845	0.39472
p__Actinobacteria__g__Bifidobacterium__s__longum_72820	correlation	0.303865	-0.0316549	0.104537	-0.0238014	0.138528	0.339629	0.197775	0.110097	-0.00281936	-0.342704	0.177254
	significance (two tails)	0.336949	0.922203	0.746453	0.94147	0.667665	0.280111	0.537794	0.733389	0.993062	0.275498	0.581554
p__Actinobacteria__g__Bifidobacterium__s__adolescentis_370225	correlation	0.10591	-0.0936367	0.655082	0.482245	-0.0978546	0.242111	0.457117	-0.404008	-0.234165	-0.416866	0.267156
	significance (two tails)	0.743221	0.772239	0.0207701	0.112342	0.762234	0.448358	0.135166	0.192744	0.46384	0.177615	0.401227
p__Actinobacteria__g__Bifidobacterium__s__adolescentis_235262	correlation	-0.053607	-0.300397	0.466851	0.101971	-0.424314	0.237549	0.242992	-0.568205	-0.422505	-0.318673	-0.0225726
	significance (two tails)	0.868581	0.342769	0.125996	0.752503	0.169202	0.457218	0.446656	0.0539201	0.171221	0.312708	0.944488
p__Actinobacteria__g__Bifidobacterium_825808	correlation	0.0326139	-0.0851647	-0.263857	-0.27015	-0.24372	0.441375	0.163659	0.158463	0.156692	-0.117644	-0.291899
	significance (two tails)	0.919853	0.792429	0.407287	0.395766	0.445255	0.15089	0.611285	0.622797	0.626738	0.715761	0.357255
p__Actinobacteria__g__Bifidobacterium_553611	correlation	0.39458	-0.0718731	-0.22225	-0.366861	0.655816	-0.270408	-0.238742	-0.299264	0.0242307	-0.200413	-0.210604
	significance (two tails)	0.204326	0.824337	0.487514	0.24079	0.0205791	0.395298	0.454893	0.344682	0.940416	0.532272	0.511169
p__Actinobacteria__g__Bifidobacterium_132041	correlation	-0.384719	-0.198906	-0.240198	-0.476421	0.19557	-0.670955	-0.328054	0.3027	-0.10371	0.174641	-0.0759045
	significance (two tails)	0.216886	0.535425	0.452062	0.117386	0.542428	0.0169154	0.297867	0.338898	0.748401	0.587224	0.814631
p__Actinobacteria__g__Arthrobacter__s__sanguinis_1128226	correlation	-0.0148368	-0.179414	0.0479843	-0.414546	-0.449869	-0.103659	0.0375684	-0.0365933	-0.0839208	0.0984105	-0.100591
	significance (two tails)	0.963498	0.576882	0.882275	0.180288	0.142267	0.74852	0.90772	0.910107	0.795403	0.760918	0.755762
p__Actinobacteria__g__Arthrobacter_463861	correlation	0.39458	-0.0718731	-0.22225	-0.366861	0.655816	-0.270408	-0.238742	-0.299264	0.0242307	-0.200413	-0.210604
	significance (two tails)	0.204326	0.824337	0.487514	0.24079	0.0205791	0.395298	0.454893	0.344682	0.940416	0.532272	0.511169
p__Actinobacteria__g__Actinomyces_1047077	correlation	0.122925	-0.0615429	0.163866	-0.37013	-0.0518355	-0.0525896	-0.132891	-0.0584178	-0.104852	0.306287	-0.0273748
	significance (two tails)	0.703502	0.849309	0.610829	0.236302	0.872892	0.871056	0.680542	0.85689	0.74571	0.332916	0.932699

## Sheet: d-Partial_day60
		beta_PA	C10	C12	C14	C16	C18	C18_1	C18_2	C18_3	C20_4n6	C22_6n3
beta_PA	correlation	1	0.176309	0.329805	0.605916	-0.0985004	0.044682	-0.316569	0.143163	0.364096	0.301621	0.376473
	significance (two tails)		0.626091	0.352035	0.0633517	0.786609	0.902453	0.372831	0.69317	0.30099	0.397024	0.283595
C10	correlation	0.176309	1	0.170033	0.503498	0.12051	0.239236	-0.323229	-0.18575	-0.201437	0.227154	0.0735651
	significance (two tails)	0.626091		0.63862	0.137908	0.74018	0.505608	0.362293	0.607404	0.576805	0.527957	0.839944
C12	correlation	0.329805	0.170033	1	0.645121	-0.138429	-0.161544	-0.345651	-0.0667246	-0.0199966	0.564992	0.172713
	significance (two tails)	0.352035	0.63862		0.0439883	0.702922	0.655702	0.327932	0.854688	0.956275	0.0887854	0.633259
C14	correlation	0.605916	0.503498	0.645121	1	-0.242551	-0.0306847	-0.375327	0.126891	-0.144926	0.30446	0.130541
	significance (two tails)	0.0633517	0.137908	0.0439883		0.499548	0.93294	0.285183	0.726852	0.68955	0.392372	0.719258
C16	correlation	-0.0985004	0.12051	-0.138429	-0.242551	1	-0.127087	-0.368902	-0.919175	-0.504616	-0.156596	0.516985
	significance (two tails)	0.786609	0.74018	0.702922	0.499548		0.726444	0.29417	0.000169202	0.136893	0.665723	0.125969
C18	correlation	0.044682	0.239236	-0.161544	-0.0306847	-0.127087	1	-0.372335	0.249056	0.076467	-0.0750957	0.0593702
	significance (two tails)	0.902453	0.505608	0.655702	0.93294	0.726444		0.28935	0.487745	0.833703	0.836651	0.870584
C18_1	correlation	-0.316569	-0.323229	-0.345651	-0.375327	-0.368902	-0.372335	1	0.209834	0.167213	0.240139	-0.745347
	significance (two tails)	0.372831	0.362293	0.327932	0.285183	0.29417	0.28935		0.56067	0.644279	0.503955	0.0133507
C18_2	correlation	0.143163	-0.18575	-0.0667246	0.126891	-0.919175	0.249056	0.209834	1	0.631738	-0.0863589	-0.364149
	significance (two tails)	0.69317	0.607404	0.854688	0.726852	0.000169202	0.487745	0.56067		0.0500755	0.812492	0.300915
C18_3	correlation	0.364096	-0.201437	-0.0199966	-0.144926	-0.504616	0.076467	0.167213	0.631738	1	0.0514793	0.0642141
	significance (two tails)	0.30099	0.576805	0.956275	0.68955	0.136893	0.833703	0.644279	0.0500755		0.887687	0.860109
C20_4n6	correlation	0.301621	0.227154	0.564992	0.30446	-0.156596	-0.0750957	0.240139	-0.0863589	0.0514793	1	-0.422462
	significance (two tails)	0.397024	0.527957	0.0887854	0.392372	0.665723	0.836651	0.503955	0.812492	0.887687		0.223887
C22_6n3	correlation	0.376473	0.0735651	0.172713	0.130541	0.516985	0.0593702	-0.745347	-0.364149	0.0642141	-0.422462	1
	significance (two tails)	0.283595	0.839944	0.633259	0.719258	0.125969	0.870584	0.0133507	0.300915	0.860109	0.223887
p__Verrucomicrobia__g__Akkermansia__s__muciniphila_593043	correlation	.	.	.	.	.	.	.	.	.	.	.
	significance (two tails)	.	.	.	.	.	.	.	.	.	.	.
p__Verrucomicrobia__g__Akkermansia__s__muciniphila_588471	correlation	.	.	.	.	.	.	.	.	.	.	.
	significance (two tails)	.	.	.	.	.	.	.	.	.	.	.
p__Verrucomicrobia__g__Akkermansia__s__muciniphila_363731	correlation	.	.	.	.	.	.	.	.	.	.	.
	significance (two tails)	.	.	.	.	.	.	.	.	.	.	.
p__Verrucomicrobia__g__Akkermansia__s__muciniphila_273232	correlation	.	.	.	.	.	.	.	.	.	.	.
	significance (two tails)	.	.	.	.	.	.	.	.	.	.	.
p__Proteobacteria__g__Trabulsiella_572750	correlation	0.166	-0.233	0.343	-0.142	-0.14	-0.348	0.165	0.157	0.735	0.287	0.121
	significance (two tails)	0.647	0.517	0.332	0.696	0.699	0.325	0.648	0.666	0.016	0.421	0.739
p__Proteobacteria__g__Sutterella_4419621	correlation	.	.	.	.	.	.	.	.	.	.	.
	significance (two tails)	.	.	.	.	.	.	.	.	.	.	.
p__Proteobacteria__g__Sutterella_4338624	correlation	.	.	.	.	.	.	.	.	.	.	.
	significance (two tails)	.	.	.	.	.	.	.	.	.	.	.
p__Proteobacteria__g__Sutterella_4095596	correlation	.	.	.	.	.	.	.	.	.	.	.
	significance (two tails)	.	.	.	.	.	.	.	.	.	.	.
p__Proteobacteria__g__Sutterella_359809	correlation	.	.	.	.	.	.	.	.	.	.	.
	significance (two tails)	.	.	.	.	.	.	.	.	.	.	.
p__Proteobacteria__g__Sutterella_215097	correlation	-0.537	0.21	-0.166	-0.122	-0.14	0.603	-0.221	0.264	-0.063	-0.361	-0.101
	significance (two tails)	0.109	0.56	0.647	0.737	0.699	0.065	0.54	0.462	0.862	0.305	0.781
p__Proteobacteria__g__Sutterella_194360	correlation	.	.	.	.	.	.	.	.	.	.	.
	significance (two tails)	.	.	.	.	.	.	.	.	.	.	.
p__Proteobacteria__g__Sutterella_189076	correlation	.	.	.	.	.	.	.	.	.	.	.
	significance (two tails)	.	.	.	.	.	.	.	.	.	.	.
p__Proteobacteria__g__Sutterella_1820513	correlation	.	.	.	.	.	.	.	.	.	.	.
	significance (two tails)	.	.	.	.	.	.	.	.	.	.	.
p__Proteobacteria__g__Sutterella_112891	correlation	.	.	.	.	.	.	.	.	.	.	.
	significance (two tails)	.	.	.	.	.	.	.	.	.	.	.
p__Proteobacteria__g__Shigella__s__sonnei_2072645	correlation	-0.484	-0.56	-0.447	-0.425	0.126	-0.225	0.226	-0.14	-0.474	-0.523	-0.103
	significance (two tails)	0.157	0.092	0.196	0.221	0.728	0.532	0.531	0.699	0.166	0.121	0.778
p__Proteobacteria__g__Serratia_808486	correlation	-0.815	0.055	-0.131	-0.186	-0.151	-0.072	0.095	0.11	-0.272	-0.483	-0.19
	significance (two tails)	0.004	0.881	0.719	0.607	0.676	0.842	0.795	0.761	0.447	0.157	0.598
p__Proteobacteria__g__Serratia_3159130	correlation	.	.	.	.	.	.	.	.	.	.	.
	significance (two tails)	.	.	.	.	.	.	.	.	.	.	.
p__Proteobacteria__g__Proteus_768553	correlation	0.294	-0.361	-0.004	0.026	-0.778	0.039	0.208	0.895	0.862	-0.089	-0.12
	significance (two tails)	0.41	0.305	0.991	0.943	0.008	0.916	0.564	0	0.001	0.806	0.741
p__Proteobacteria__g__Ochrobactrum_256276	correlation	-0.411	0.626	-0.064	0.085	0.325	-0.135	0.134	-0.531	-0.602	0.026	-0.11
	significance (two tails)	0.238	0.053	0.86	0.815	0.359	0.71	0.711	0.115	0.066	0.943	0.761
p__Proteobacteria__g__Ochrobactrum_2458172	correlation	0.238	0.837	-0.106	0.363	0.364	0.332	-0.286	-0.392	-0.445	0.181	0.061
	significance (two tails)	0.508	0.003	0.771	0.303	0.301	0.349	0.423	0.263	0.198	0.616	0.868
p__Proteobacteria__g__Morganella__s__morganii_4477719	correlation	.	.	.	.	.	.	.	.	.	.	.
	significance (two tails)	.	.	.	.	.	.	.	.	.	.	.
p__Proteobacteria__g__Klebsiella_813217	correlation	-0.299	0.269	0.014	0.169	0.099	-0.193	-0.037	-0.064	-0.439	0.126	-0.438
	significance (two tails)	0.402	0.453	0.97	0.64	0.786	0.593	0.919	0.86	0.205	0.729	0.206
p__Proteobacteria__g__Helicobacter__s__pullorum_311173	correlation	.	.	.	.	.	.	.	.	.	.	.
	significance (two tails)	.	.	.	.	.	.	.	.	.	.	.
p__Proteobacteria__g__Haemophilus__s__parainfluenzae_4296080	correlation	.	.	.	.	.	.	.	.	.	.	.
	significance (two tails)	.	.	.	.	.	.	.	.	.	.	.
p__Proteobacteria__g__Haemophilus_341460	correlation	0.5	0.529	0.269	0.74	0.016	0.519	-0.716	0.058	-0.235	-0.083	0.383
	significance (two tails)	0.141	0.116	0.452	0.014	0.965	0.124	0.02	0.874	0.513	0.821	0.275
p__Proteobacteria__g__Haemophilus_153997	correlation	-0.025	-0.474	0.458	-0.081	-0.199	-0.511	0.254	0.086	0.162	0.523	-0.341
	significance (two tails)	0.945	0.166	0.183	0.824	0.581	0.131	0.479	0.812	0.656	0.121	0.335
p__Proteobacteria__g__Geobacter_3950373	correlation	.	.	.	.	.	.	.	.	.	.	.
	significance (two tails)	.	.	.	.	.	.	.	.	.	.	.
p__Proteobacteria__g__Erwinia_922761	correlation	-0.417	-0.172	0.158	-0.371	0.06	-0.391	0.613	-0.273	-0.059	0.632	-0.574
	significance (two tails)	0.231	0.634	0.663	0.291	0.869	0.264	0.059	0.445	0.871	0.05	0.083
p__Proteobacteria__g__Enterobacter__s__cloacae_210269	correlation	-0.06	-0.239	0.226	-0.181	-0.025	0.225	0.281	-0.164	0.096	0.352	-0.023
	significance (two tails)	0.869	0.507	0.53	0.617	0.945	0.531	0.431	0.65	0.793	0.318	0.95
p__Proteobacteria__g__Enhydrobacter_574102	correlation	0.081	0.549	-0.19	0.422	0.32	-0.145	-0.102	-0.338	-0.484	-0.3	0.199
	significance (two tails)	0.825	0.1	0.6	0.224	0.367	0.689	0.778	0.339	0.156	0.399	0.581
p__Proteobacteria__g__Delftia_1117255	correlation	-0.037	0.654	0.533	0.637	-0.121	0.061	-0.127	-0.106	-0.507	0.542	-0.368
	significance (two tails)	0.918	0.04	0.113	0.047	0.739	0.866	0.728	0.77	0.135	0.106	0.296
p__Proteobacteria__g__Cronobacter__s__dublinensis_667570	correlation	.	.	.	.	.	.	.	.	.	.	.
	significance (two tails)	.	.	.	.	.	.	.	.	.	.	.
p__Proteobacteria__g__Comamonas_581921	correlation	.	.	.	.	.	.	.	.	.	.	.
	significance (two tails)	.	.	.	.	.	.	.	.	.	.	.
p__Proteobacteria__g__Citrobacter_674696	correlation	-0.214	0.096	0.617	0.029	0.329	-0.441	0.02	-0.516	-0.156	0.53	0.001
	significance (two tails)	0.553	0.791	0.058	0.937	0.353	0.202	0.956	0.126	0.667	0.115	0.999
p__Proteobacteria__g__Citrobacter_280706	correlation	-0.214	0.096	0.617	0.029	0.329	-0.441	0.02	-0.516	-0.156	0.53	0.001
	significance (two tails)	0.553	0.791	0.058	0.937	0.353	0.202	0.956	0.126	0.667	0.115	0.999
p__Proteobacteria__g__Campylobacter_297260	correlation	.	.	.	.	.	.	.	.	.	.	.
	significance (two tails)	.	.	.	.	.	.	.	.	.	.	.
p__Proteobacteria__g__Bilophila_361170	correlation	0.113	-0.065	-0.319	0.052	0.342	-0.335	0.106	-0.253	-0.069	-0.467	0.36
	significance (two tails)	0.755	0.858	0.37	0.887	0.333	0.344	0.771	0.48	0.85	0.174	0.307
p__Proteobacteria__g__Acinetobacter__s__johnsonii_1896186	correlation	-0.33	-0.367	-0.527	-0.541	0.074	-0.302	0.674	-0.093	-0.17	0.18	-0.667
	significance (two tails)	0.351	0.297	0.118	0.107	0.839	0.396	0.032	0.799	0.638	0.618	0.035
p__Proteobacteria__g__Acinetobacter_405425	correlation	.	.	.	.	.	.	.	.	.	.	.
	significance (two tails)	.	.	.	.	.	.	.	.	.	.	.
p__Proteobacteria__g__Acinetobacter_3453734	correlation	.	.	.	.	.	.	.	.	.	.	.
	significance (two tails)	.	.	.	.	.	.	.	.	.	.	.
p__Proteobacteria__g__Acinetobacter_219826	correlation	-0.216	0.596	-0.231	0.226	0.334	0.096	-0.231	-0.227	-0.401	-0.32	0.07
	significance (two tails)	0.548	0.069	0.521	0.53	0.346	0.792	0.52	0.527	0.251	0.367	0.847
p__Proteobacteria__f__Sphingomonadaceae_860929	correlation	.	.	.	.	.	.	.	.	.	.	.
	significance (two tails)	.	.	.	.	.	.	.	.	.	.	.
p__Proteobacteria__f__Enterobacteriaceae_9710	correlation	-0.425	-0.546	-0.585	-0.641	-0.093	-0.045	0.178	0.284	0.338	-0.808	0.176
	significance (two tails)	0.221	0.103	0.076	0.046	0.798	0.901	0.623	0.426	0.339	0.005	0.628
p__Proteobacteria__f__Enterobacteriaceae_820346	correlation	.	.	.	.	.	.	.	.	.	.	.
	significance (two tails)	.	.	.	.	.	.	.	.	.	.	.
p__Proteobacteria__f__Enterobacteriaceae_816702	correlation	-0.288	-0.267	-0.211	-0.306	-0.502	-0.078	0.224	0.627	0.656	-0.469	-0.021
	significance (two tails)	0.42	0.456	0.558	0.39	0.139	0.83	0.534	0.052	0.039	0.171	0.954
p__Proteobacteria__f__Enterobacteriaceae_797229	correlation	0.301	0.317	-0.288	0.021	0.232	0.345	-0.492	-0.068	0.166	-0.567	0.729
	significance (two tails)	0.398	0.372	0.419	0.954	0.519	0.329	0.148	0.851	0.646	0.087	0.017
p__Proteobacteria__f__Enterobacteriaceae_782953	correlation	0.311	0.229	-0.186	0.029	0.149	0.396	-0.498	-0.031	0.171	-0.508	0.724
	significance (two tails)	0.381	0.525	0.608	0.938	0.681	0.257	0.143	0.933	0.636	0.133	0.018
p__Proteobacteria__f__Enterobacteriaceae_754778	correlation	-0.214	0.096	0.617	0.029	0.329	-0.441	0.02	-0.516	-0.156	0.53	0.001
	significance (two tails)	0.553	0.791	0.058	0.937	0.353	0.202	0.956	0.126	0.667	0.115	0.999
p__Proteobacteria__f__Enterobacteriaceae_746679	correlation	-0.244	0.825	-0.176	0.237	0.258	0.273	-0.217	-0.308	-0.578	-0.106	-0.052
	significance (two tails)	0.497	0.003	0.627	0.51	0.471	0.445	0.547	0.387	0.08	0.771	0.886
p__Proteobacteria__f__Enterobacteriaceae_676211	correlation	-0.443	-0.025	-0.029	-0.179	-0.562	0.05	0.655	0.31	0.123	0.163	-0.541
	significance (two tails)	0.2	0.945	0.936	0.621	0.091	0.89	0.04	0.383	0.735	0.653	0.107
p__Proteobacteria__f__Enterobacteriaceae_668514	correlation	.	.	.	.	.	.	.	.	.	.	.
	significance (two tails)	.	.	.	.	.	.	.	.	.	.	.
p__Proteobacteria__f__Enterobacteriaceae_588216	correlation	0.299	0.245	-0.068	0.078	-0.046	0.247	-0.243	0.055	0.308	-0.35	0.588
	significance (two tails)	0.402	0.494	0.851	0.831	0.899	0.491	0.499	0.881	0.387	0.322	0.074
p__Proteobacteria__f__Enterobacteriaceae_581782	correlation	-0.418	-0.416	-0.169	-0.249	0.16	-0.16	-0.132	-0.176	-0.44	-0.634	0.253
	significance (two tails)	0.23	0.232	0.64	0.489	0.659	0.659	0.716	0.626	0.203	0.049	0.48
p__Proteobacteria__f__Enterobacteriaceae_581021	correlation	-0.213	0.088	-0.278	0.096	-0.529	-0.352	0.632	0.415	-0.078	0.058	-0.751
	significance (two tails)	0.554	0.809	0.437	0.793	0.116	0.318	0.05	0.233	0.831	0.874	0.012
p__Proteobacteria__f__Enterobacteriaceae_566243	correlation	0.278	0.341	-0.307	0.132	0.458	0.177	-0.148	-0.471	-0.547	0.053	0.076
	significance (two tails)	0.436	0.335	0.389	0.717	0.183	0.625	0.684	0.169	0.102	0.884	0.835
p__Proteobacteria__f__Enterobacteriaceae_559204	correlation	-0.287	-0.173	0.333	-0.244	0.381	-0.381	0.01	-0.442	-0.219	0.454	-0.174
	significance (two tails)	0.421	0.632	0.347	0.497	0.277	0.278	0.978	0.2	0.544	0.187	0.63
p__Proteobacteria__f__Enterobacteriaceae_538000	correlation	.	.	.	.	.	.	.	.	.	.	.
	significance (two tails)	.	.	.	.	.	.	.	.	.	.	.
p__Proteobacteria__f__Enterobacteriaceae_528421	correlation	-0.298	-0.308	0.325	-0.349	0.344	-0.241	0.116	-0.445	-0.173	0.528	-0.204
	significance (two tails)	0.404	0.387	0.36	0.322	0.33	0.502	0.749	0.198	0.632	0.117	0.572
p__Proteobacteria__f__Enterobacteriaceae_518002	correlation	.	.	.	.	.	.	.	.	.	.	.
	significance (two tails)	.	.	.	.	.	.	.	.	.	.	.
p__Proteobacteria__f__Enterobacteriaceae_4461030	correlation	-0.106	0.757	0.356	0.404	0.314	-0.117	-0.103	-0.533	-0.607	0.49	-0.177
	significance (two tails)	0.77	0.011	0.313	0.247	0.377	0.747	0.777	0.112	0.063	0.15	0.625
p__Proteobacteria__f__Enterobacteriaceae_4333897	correlation	-0.503	-0.404	-0.515	-0.491	0.05	0.477	-0.036	0.041	-0.36	-0.518	-0.093
	significance (two tails)	0.138	0.247	0.127	0.15	0.89	0.163	0.921	0.911	0.307	0.125	0.799
p__Proteobacteria__f__Enterobacteriaceae_4111715	correlation	-0.237	-0.116	-0.207	-0.194	0.43	0.146	-0.181	-0.502	-0.595	-0.399	0.341
	significance (two tails)	0.509	0.75	0.566	0.592	0.215	0.688	0.617	0.139	0.07	0.253	0.334
p__Proteobacteria__f__Enterobacteriaceae_3829957	correlation	0.354	0.329	-0.038	0.102	0.262	0.554	-0.577	-0.18	0.078	-0.302	0.733
	significance (two tails)	0.316	0.354	0.917	0.78	0.464	0.097	0.081	0.618	0.83	0.396	0.016
p__Proteobacteria__f__Enterobacteriaceae_368849	correlation	-0.815	0.055	-0.131	-0.186	-0.151	-0.072	0.095	0.11	-0.272	-0.483	-0.19
	significance (two tails)	0.004	0.881	0.719	0.607	0.676	0.842	0.795	0.761	0.447	0.157	0.598
p__Proteobacteria__f__Enterobacteriaceae_366451	correlation	-0.542	0.107	0.477	-0.056	0.219	-0.414	0.059	-0.399	-0.254	0.248	-0.083
	significance (two tails)	0.106	0.768	0.163	0.877	0.544	0.235	0.872	0.253	0.479	0.489	0.82
p__Proteobacteria__f__Enterobacteriaceae_3531225	correlation	0.108	0.031	-0.27	-0.299	0.247	0.131	-0.167	-0.234	0.1	-0.342	0.526
	significance (two tails)	0.766	0.933	0.45	0.402	0.491	0.719	0.644	0.515	0.784	0.334	0.118
p__Proteobacteria__f__Enterobacteriaceae_345362	correlation	-0.108	0.189	-0.229	-0.011	0.267	-0.177	-0.249	-0.286	-0.404	-0.501	0.348
	significance (two tails)	0.767	0.601	0.525	0.977	0.455	0.625	0.487	0.423	0.247	0.14	0.325
p__Proteobacteria__f__Enterobacteriaceae_331697	correlation	-0.663	-0.393	0.118	-0.338	-0.2	-0.366	0.516	0.094	-0.039	0.218	-0.608
	significance (two tails)	0.037	0.262	0.745	0.34	0.58	0.299	0.126	0.797	0.914	0.545	0.062
p__Proteobacteria__f__Enterobacteriaceae_304641	correlation	0.14	0.021	0.408	0.653	-0.322	-0.512	0.007	0.146	-0.334	-0.016	-0.093
	significance (two tails)	0.7	0.954	0.242	0.041	0.364	0.131	0.985	0.687	0.346	0.964	0.798
p__Proteobacteria__f__Enterobacteriaceae_301149	correlation	-0.021	0.165	-0.25	0.223	0.329	-0.132	-0.148	-0.379	-0.743	-0.371	0.139
	significance (two tails)	0.953	0.649	0.486	0.537	0.354	0.716	0.682	0.281	0.014	0.292	0.701
p__Proteobacteria__f__Enterobacteriaceae_299267	correlation	0.301	0.424	-0.225	0.244	-0.115	0.323	-0.389	0.201	0.104	-0.489	0.445
	significance (two tails)	0.398	0.223	0.532	0.498	0.753	0.363	0.266	0.577	0.774	0.152	0.198
p__Proteobacteria__f__Enterobacteriaceae_295053	correlation	0.12	-0.589	-0.343	-0.281	0.235	-0.168	0.152	-0.218	-0.267	-0.161	0.038
	significance (two tails)	0.741	0.073	0.332	0.431	0.514	0.643	0.675	0.545	0.456	0.657	0.916
p__Proteobacteria__f__Enterobacteriaceae_2689396	correlation	0.008	0.256	-0.112	-0.045	0.252	0.308	-0.386	-0.296	-0.275	-0.322	0.47
	significance (two tails)	0.983	0.475	0.757	0.903	0.482	0.386	0.27	0.406	0.441	0.364	0.171
p__Proteobacteria__f__Enterobacteriaceae_231787	correlation	0.194	0.208	-0.407	-0.002	0.514	0.166	-0.136	-0.498	-0.558	-0.084	0.129
	significance (two tails)	0.592	0.565	0.243	0.995	0.128	0.646	0.709	0.143	0.094	0.818	0.723
p__Proteobacteria__f__Enterobacteriaceae_228556	correlation	0.368	-0.346	-0.126	-0.185	-0.435	-0.027	0.171	0.611	0.967	-0.117	0.138
	significance (two tails)	0.296	0.328	0.728	0.608	0.209	0.942	0.636	0.061	0	0.747	0.705
p__Proteobacteria__f__Enterobacteriaceae_197286	correlation	0.388	0.418	-0.077	0.504	-0.53	0.165	0.292	0.425	0.003	0.353	-0.528
	significance (two tails)	0.268	0.229	0.832	0.137	0.115	0.649	0.412	0.221	0.994	0.317	0.117
p__Proteobacteria__f__Enterobacteriaceae_173654	correlation	0.047	-0.598	-0.413	-0.353	0.292	-0.138	0.128	-0.252	-0.285	-0.261	0.089
	significance (two tails)	0.897	0.068	0.236	0.316	0.413	0.705	0.724	0.482	0.425	0.467	0.807
p__Proteobacteria__f__Enterobacteriaceae_1111294	correlation	-0.209	0.074	-0.581	-0.486	0.062	-0.002	0.249	-0.072	0.066	-0.337	0.039
	significance (two tails)	0.561	0.84	0.078	0.155	0.865	0.996	0.488	0.843	0.857	0.341	0.914
p__Fusobacteria__g__Fusobacterium_572889	correlation	0.529	0.041	0.459	0.6	0.132	-0.225	-0.567	-0.162	-0.163	-0.218	0.694
	significance (two tails)	0.116	0.91	0.182	0.066	0.716	0.531	0.088	0.654	0.652	0.546	0.026
p__Fusobacteria__g__Fusobacterium_444857	correlation	-0.204	-0.077	-0.517	-0.266	-0.152	-0.279	0.886	0.009	-0.042	0.102	-0.58
	significance (two tails)	0.571	0.832	0.126	0.458	0.675	0.436	0.001	0.981	0.909	0.78	0.079
p__Fusobacteria__g__Fusobacterium_4439398	correlation	-0.094	-0.089	0.234	0.411	-0.787	0.132	0.105	0.694	-0.06	0.039	-0.515
	significance (two tails)	0.796	0.807	0.516	0.238	0.007	0.717	0.773	0.026	0.868	0.915	0.128
p__Fusobacteria__g__Fusobacterium_3073894	correlation	.	.	.	.	.	.	.	.	.	.	.
	significance (two tails)	.	.	.	.	.	.	.	.	.	.	.
p__Fusobacteria__g__Fusobacterium_1139769	correlation	0.611	0.105	0.399	0.769	-0.006	-0.402	-0.291	-0.057	-0.195	-0.055	0.38
	significance (two tails)	0.061	0.774	0.254	0.009	0.988	0.25	0.414	0.876	0.589	0.88	0.279
p__Firmicutes__o__Clostridiales_564806	correlation	-0.293	-0.505	-0.637	-0.603	0.487	0.028	-0.008	-0.35	-0.304	-0.655	0.297
	significance (two tails)	0.412	0.136	0.048	0.065	0.153	0.938	0.983	0.321	0.394	0.04	0.404
p__Firmicutes__o__Clostridiales_562376	correlation	.	.	.	.	.	.	.	.	.	.	.
	significance (two tails)	.	.	.	.	.	.	.	.	.	.	.
p__Firmicutes__o__Clostridiales_509416	correlation	-0.345	0.702	0.202	0.124	0.249	0.451	-0.309	-0.32	-0.386	0.232	-0.068
	significance (two tails)	0.329	0.024	0.576	0.733	0.487	0.191	0.386	0.368	0.271	0.519	0.852
p__Firmicutes__o__Clostridiales_369429	correlation	0.02	0.728	0.059	0.585	0.182	-0.012	-0.32	-0.262	-0.611	-0.186	0.139
	significance (two tails)	0.956	0.017	0.872	0.076	0.614	0.974	0.367	0.464	0.061	0.607	0.703
p__Firmicutes__o__Clostridiales_316728	correlation	.	.	.	.	.	.	.	.	.	.	.
	significance (two tails)	.	.	.	.	.	.	.	.	.	.	.
p__Firmicutes__o__Clostridiales_2415201	correlation	.	.	.	.	.	.	.	.	.	.	.
	significance (two tails)	.	.	.	.	.	.	.	.	.	.	.
p__Firmicutes__o__Clostridiales_191043	correlation	0.043	0.215	-0.043	-0.035	-0.147	0.953	-0.344	0.276	0.173	0.091	-0.024
	significance (two tails)	0.907	0.551	0.906	0.923	0.685	0	0.33	0.441	0.633	0.802	0.947
p__Firmicutes__o__Clostridiales_179067	correlation	.	.	.	.	.	.	.	.	.	.	.
	significance (two tails)	.	.	.	.	.	.	.	.	.	.	.
p__Firmicutes__g__Veillonella__s__parvula_518743	correlation	0.254	-0.048	0.377	0.198	0.251	0.06	-0.703	-0.233	-0.07	-0.338	0.833
	significance (two tails)	0.48	0.895	0.283	0.583	0.484	0.869	0.023	0.517	0.847	0.34	0.003
p__Firmicutes__g__Veillonella__s__parvula_4391625	correlation	-0.328	-0.572	-0.529	-0.661	0.473	-0.046	-0.009	-0.312	-0.309	-0.369	0.037
	significance (two tails)	0.355	0.084	0.116	0.038	0.167	0.899	0.98	0.38	0.384	0.294	0.92
p__Firmicutes__g__Veillonella__s__parvula_3889756	correlation	-0.128	-0.415	-0.311	-0.611	0.262	-0.149	0.155	-0.212	-0.027	0.099	-0.146
	significance (two tails)	0.724	0.233	0.382	0.06	0.465	0.682	0.668	0.556	0.941	0.785	0.688
p__Firmicutes__g__Veillonella__s__parvula_3801267	correlation	0.254	-0.048	0.377	0.198	0.251	0.06	-0.703	-0.233	-0.07	-0.338	0.833
	significance (two tails)	0.48	0.895	0.283	0.583	0.484	0.869	0.023	0.517	0.847	0.34	0.003
p__Firmicutes__g__Veillonella__s__dispar_962249	correlation	-0.196	-0.174	0.005	-0.515	0.452	0.065	-0.368	-0.4	-0.027	-0.128	0.428
	significance (two tails)	0.588	0.631	0.989	0.127	0.189	0.859	0.295	0.251	0.94	0.725	0.218
p__Firmicutes__g__Veillonella__s__dispar_4401373	correlation	-0.124	0.293	0.168	-0.054	0.563	-0.121	-0.165	-0.606	-0.471	0.49	-0.153
	significance (two tails)	0.732	0.412	0.644	0.882	0.09	0.739	0.649	0.063	0.169	0.151	0.673
p__Firmicutes__g__Veillonella__s__dispar_4316391	correlation	0.284	0.007	0.186	0.28	0.435	-0.048	-0.698	-0.236	-0.027	-0.504	0.844
	significance (two tails)	0.427	0.984	0.608	0.433	0.209	0.896	0.025	0.511	0.94	0.137	0.002
p__Firmicutes__g__Veillonella__s__dispar_4310208	correlation	.	.	.	.	.	.	.	.	.	.	.
	significance (two tails)	.	.	.	.	.	.	.	.	.	.	.
p__Firmicutes__g__Veillonella__s__dispar_4296244	correlation	0.185	-0.034	0.182	0.017	0.719	-0.165	-0.452	-0.756	-0.539	0.053	0.487
	significance (two tails)	0.608	0.925	0.615	0.963	0.019	0.65	0.189	0.011	0.108	0.885	0.154
p__Firmicutes__g__Veillonella__s__dispar_342427	correlation	-0.348	-0.432	-0.491	-0.813	0.421	-0.04	0.09	-0.312	-0.073	-0.181	0.005
	significance (two tails)	0.324	0.212	0.149	0.004	0.226	0.912	0.805	0.381	0.841	0.618	0.989
p__Firmicutes__g__Veillonella_4440670	correlation	-0.043	-0.264	-0.352	-0.089	-0.716	-0.168	0.837	0.635	0.377	0.047	-0.659
	significance (two tails)	0.907	0.461	0.319	0.808	0.02	0.643	0.003	0.049	0.284	0.897	0.038
p__Firmicutes__g__Veillonella_368099	correlation	-0.293	-0.505	-0.637	-0.603	0.487	0.028	-0.008	-0.35	-0.304	-0.655	0.297
	significance (two tails)	0.412	0.136	0.048	0.065	0.153	0.938	0.983	0.321	0.394	0.04	0.404
p__Firmicutes__g__Veillonella_1144463	correlation	.	.	.	.	.	.	.	.	.	.	.
	significance (two tails)	.	.	.	.	.	.	.	.	.	.	.
p__Firmicutes__g__Veillonella_1023075	correlation	-0.815	0.055	-0.131	-0.186	-0.151	-0.072	0.095	0.11	-0.272	-0.483	-0.19
	significance (two tails)	0.004	0.881	0.719	0.607	0.676	0.842	0.795	0.761	0.447	0.157	0.598
p__Firmicutes__g__Streptococcus__s__luteciae_303161	correlation	.	.	.	.	.	.	.	.	.	.	.
	significance (two tails)	.	.	.	.	.	.	.	.	.	.	.
p__Firmicutes__g__Streptococcus_967427	correlation	-0.328	0.082	0.493	0.098	0.389	-0.332	-0.383	-0.435	-0.246	-0.156	0.443
	significance (two tails)	0.354	0.821	0.148	0.788	0.266	0.349	0.275	0.209	0.492	0.667	0.2
p__Firmicutes__g__Streptococcus_593803	correlation	-0.145	-0.184	0.535	-0.072	0.095	-0.121	-0.22	-0.205	0.162	-0.034	0.492
	significance (two tails)	0.69	0.611	0.111	0.844	0.794	0.739	0.541	0.569	0.654	0.926	0.148
p__Firmicutes__g__Streptococcus_579608	correlation	-0.687	-0.422	-0.357	-0.361	-0.017	-0.242	0.247	-0.034	-0.489	-0.547	-0.214
	significance (two tails)	0.028	0.224	0.312	0.306	0.962	0.501	0.492	0.926	0.152	0.102	0.553
p__Firmicutes__g__Streptococcus_561636	correlation	-0.76	-0.316	-0.222	-0.499	0.075	0.097	0.24	-0.165	-0.268	-0.411	-0.031
	significance (two tails)	0.011	0.373	0.538	0.142	0.837	0.79	0.504	0.649	0.455	0.238	0.932
p__Firmicutes__g__Streptococcus_522025	correlation	-0.681	-0.141	0.072	-0.284	-0.137	0.117	0.291	-0.041	-0.138	-0.104	-0.166
	significance (two tails)	0.03	0.697	0.842	0.426	0.705	0.747	0.415	0.911	0.704	0.774	0.647
p__Firmicutes__g__Streptococcus_516966	correlation	-0.364	-0.032	0.234	-0.124	0.5	0.226	-0.51	-0.542	-0.667	-0.022	0.208
	significance (two tails)	0.301	0.93	0.514	0.733	0.141	0.531	0.132	0.106	0.035	0.951	0.564
p__Firmicutes__g__Streptococcus_516611	correlation	-0.79	-0.083	0.005	-0.274	-0.155	0.059	0.245	0.011	-0.199	-0.251	-0.19
	significance (two tails)	0.007	0.82	0.988	0.444	0.67	0.872	0.495	0.977	0.582	0.485	0.6
p__Firmicutes__g__Streptococcus_349024	correlation	.	.	.	.	.	.	.	.	.	.	.
	significance (two tails)	.	.	.	.	.	.	.	.	.	.	.
p__Firmicutes__g__Streptococcus_3449122	correlation	-0.68	-0.357	-0.199	-0.509	0.101	0.128	0.257	-0.202	-0.234	-0.337	-0.005
	significance (two tails)	0.03	0.311	0.582	0.133	0.782	0.724	0.474	0.577	0.515	0.342	0.988
p__Firmicutes__g__Streptococcus_316587	correlation	.	.	.	.	.	.	.	.	.	.	.
	significance (two tails)	.	.	.	.	.	.	.	.	.	.	.
p__Firmicutes__g__Streptococcus_301270	correlation	.	.	.	.	.	.	.	.	.	.	.
	significance (two tails)	.	.	.	.	.	.	.	.	.	.	.
p__Firmicutes__g__Streptococcus_1082539	correlation	-0.397	0.344	0.165	0.064	0.203	0.275	-0.315	-0.34	-0.439	-0.273	0.325
	significance (two tails)	0.256	0.331	0.648	0.86	0.574	0.441	0.376	0.337	0.204	0.445	0.359
p__Firmicutes__g__Streptococcus_1078207	correlation	-0.283	-0.191	0.343	-0.215	0.125	-0.62	0.203	-0.208	0.254	0.104	0.118
	significance (two tails)	0.428	0.597	0.332	0.551	0.731	0.056	0.573	0.564	0.478	0.775	0.744
p__Firmicutes__g__Streptococcus_1000547	correlation	-0.815	0.055	-0.131	-0.186	-0.151	-0.072	0.095	0.11	-0.272	-0.483	-0.19
	significance (two tails)	0.004	0.881	0.719	0.607	0.676	0.842	0.795	0.761	0.447	0.157	0.598
p__Firmicutes__g__Staphylococcus_4323284	correlation	-0.039	0.074	0.136	0.265	-0.644	0.697	-0.145	0.66	0.067	0.085	-0.375
	significance (two tails)	0.915	0.839	0.708	0.46	0.045	0.025	0.689	0.038	0.853	0.815	0.285
p__Firmicutes__g__Staphylococcus_1084865	correlation	0.065	-0.199	0.128	-0.12	-0.185	-0.595	0.773	-0.01	0.332	0.586	-0.44
	significance (two tails)	0.859	0.581	0.724	0.742	0.609	0.07	0.009	0.978	0.348	0.075	0.203
p__Firmicutes__g__Staphylococcus_1076316	correlation	-0.11	-0.2	0.067	0.196	-0.562	-0.219	0.473	0.545	0.148	0.219	-0.682
	significance (two tails)	0.763	0.579	0.855	0.588	0.091	0.543	0.167	0.104	0.684	0.543	0.03
p__Firmicutes__g__Ruminococcus__s__gnavus_360015	correlation	.	.	.	.	.	.	.	.	.	.	.
	significance (two tails)	.	.	.	.	.	.	.	.	.	.	.
p__Firmicutes__g__Ruminococcus_591635	correlation	0.093	0.056	-0.144	0.143	0.277	-0.116	-0.152	-0.057	0.035	-0.275	0.2
	significance (two tails)	0.798	0.879	0.691	0.694	0.438	0.75	0.676	0.876	0.922	0.442	0.579
p__Firmicutes__g__Ruminococcus_586271	correlation	.	.	.	.	.	.	.	.	.	.	.
	significance (two tails)	.	.	.	.	.	.	.	.	.	.	.
p__Firmicutes__g__Ruminococcus_563086	correlation	.	.	.	.	.	.	.	.	.	.	.
	significance (two tails)	.	.	.	.	.	.	.	.	.	.	.
p__Firmicutes__g__Ruminococcus_4390330	correlation	.	.	.	.	.	.	.	.	.	.	.
	significance (two tails)	.	.	.	.	.	.	.	.	.	.	.
p__Firmicutes__g__Ruminococcus_3421266	correlation	.	.	.	.	.	.	.	.	.	.	.
	significance (two tails)	.	.	.	.	.	.	.	.	.	.	.
p__Firmicutes__g__Ruminococcus_304211	correlation	.	.	.	.	.	.	.	.	.	.	.
	significance (two tails)	.	.	.	.	.	.	.	.	.	.	.
p__Firmicutes__g__Ruminococcus_199543	correlation	.	.	.	.	.	.	.	.	.	.	.
	significance (two tails)	.	.	.	.	.	.	.	.	.	.	.
p__Firmicutes__g__Roseburia_701221	correlation	0.103	-0.056	-0.33	0.051	0.334	-0.329	0.121	-0.234	-0.06	-0.448	0.319
	significance (two tails)	0.777	0.879	0.352	0.889	0.346	0.353	0.739	0.516	0.87	0.194	0.37
p__Firmicutes__g__Roseburia_508968	correlation	0.003	0.042	0.719	0.152	0.416	-0.298	-0.447	-0.548	-0.165	0.184	0.548
	significance (two tails)	0.994	0.908	0.019	0.675	0.231	0.403	0.196	0.101	0.648	0.612	0.101
p__Firmicutes__g__Robinsoniella__s__peoriensis_4325509	correlation	-0.815	0.055	-0.131	-0.186	-0.151	-0.072	0.095	0.11	-0.272	-0.483	-0.19
	significance (two tails)	0.004	0.881	0.719	0.607	0.676	0.842	0.795	0.761	0.447	0.157	0.598
p__Firmicutes__g__Pseudoramibacter_Eubacterium_191975	correlation	.	.	.	.	.	.	.	.	.	.	.
	significance (two tails)	.	.	.	.	.	.	.	.	.	.	.
p__Firmicutes__g__Phascolarctobacterium_556835	correlation	-0.062	-0.007	-0.461	-0.063	0.121	-0.279	0.47	-0.04	0.001	-0.153	-0.227
	significance (two tails)	0.865	0.984	0.18	0.863	0.739	0.435	0.17	0.913	0.999	0.674	0.529
p__Firmicutes__g__Phascolarctobacterium_3138798	correlation	-0.144	-0.141	-0.529	-0.217	0.192	-0.323	0.498	-0.081	-0.06	-0.101	-0.343
	significance (two tails)	0.692	0.697	0.115	0.547	0.595	0.363	0.143	0.825	0.869	0.781	0.332
p__Firmicutes__g__Phascolarctobacterium_275237	correlation	-0.06	-0.239	0.226	-0.181	-0.025	0.225	0.281	-0.164	0.096	0.352	-0.023
	significance (two tails)	0.869	0.507	0.53	0.617	0.945	0.531	0.431	0.65	0.793	0.318	0.95
p__Firmicutes__g__Oscillospira_533847	correlation	.	.	.	.	.	.	.	.	.	.	.
	significance (two tails)	.	.	.	.	.	.	.	.	.	.	.
p__Firmicutes__g__Oscillospira_367176	correlation	.	.	.	.	.	.	.	.	.	.	.
	significance (two tails)	.	.	.	.	.	.	.	.	.	.	.
p__Firmicutes__g__Oscillospira_199422	correlation	-0.034	-0.282	-0.633	-0.653	0.073	-0.016	0.155	0.211	0.547	-0.284	0.001
	significance (two tails)	0.925	0.43	0.05	0.04	0.841	0.965	0.669	0.559	0.102	0.426	0.997
p__Firmicutes__g__Megasphaera_817140	correlation	.	.	.	.	.	.	.	.	.	.	.
	significance (two tails)	.	.	.	.	.	.	.	.	.	.	.
p__Firmicutes__g__Megasphaera_539819	correlation	.	.	.	.	.	.	.	.	.	.	.
	significance (two tails)	.	.	.	.	.	.	.	.	.	.	.
p__Firmicutes__g__Megasphaera_4296242	correlation	.	.	.	.	.	.	.	.	.	.	.
	significance (two tails)	.	.	.	.	.	.	.	.	.	.	.
p__Firmicutes__g__Megasphaera_264967	correlation	.	.	.	.	.	.	.	.	.	.	.
	significance (two tails)	.	.	.	.	.	.	.	.	.	.	.
p__Firmicutes__g__Megamonas_325808	correlation	0.077	0.137	0.167	0.188	-0.355	0.894	-0.47	0.435	0.105	-0.009	0.033
	significance (two tails)	0.832	0.705	0.645	0.604	0.315	0	0.17	0.209	0.773	0.981	0.928
p__Firmicutes__g__Leuconostoc_540940	correlation	.	.	.	.	.	.	.	.	.	.	.
	significance (two tails)	.	.	.	.	.	.	.	.	.	.	.
p__Firmicutes__g__Lactobacillus__s__zeae_73609	correlation	-0.073	0.243	0.243	0.177	0.033	0.133	-0.629	-0.014	-0.058	-0.491	0.616
	significance (two tails)	0.84	0.499	0.499	0.625	0.927	0.713	0.051	0.97	0.873	0.15	0.058
p__Firmicutes__g__Lactobacillus__s__reuteri_411486	correlation	-0.06	-0.239	0.226	-0.181	-0.025	0.225	0.281	-0.164	0.096	0.352	-0.023
	significance (two tails)	0.869	0.507	0.53	0.617	0.945	0.531	0.431	0.65	0.793	0.318	0.95
p__Firmicutes__g__Lactobacillus_588197	correlation	-0.06	-0.239	0.226	-0.181	-0.025	0.225	0.281	-0.164	0.096	0.352	-0.023
	significance (two tails)	0.869	0.507	0.53	0.617	0.945	0.531	0.431	0.65	0.793	0.318	0.95
p__Firmicutes__g__Lactobacillus_354905	correlation	0.457	0.605	0.232	0.217	0.196	-0.015	-0.113	-0.191	0.387	0.477	0.202
	significance (two tails)	0.184	0.064	0.518	0.547	0.587	0.968	0.756	0.597	0.27	0.163	0.575
p__Firmicutes__g__Lactobacillus_292057	correlation	.	.	.	.	.	.	.	.	.	.	.
	significance (two tails)	.	.	.	.	.	.	.	.	.	.	.
p__Firmicutes__g__Lactobacillus_202131	correlation	.	.	.	.	.	.	.	.	.	.	.
	significance (two tails)	.	.	.	.	.	.	.	.	.	.	.
p__Firmicutes__g__Lactobacillus_1995182	correlation	0.06	0.62	0.358	0.325	0.533	-0.113	-0.506	-0.514	-0.165	0.008	0.522
	significance (two tails)	0.868	0.056	0.31	0.36	0.113	0.756	0.135	0.129	0.648	0.983	0.122
p__Firmicutes__g__Lachnospira_369486	correlation	0.254	-0.048	0.377	0.198	0.251	0.06	-0.703	-0.233	-0.07	-0.338	0.833
	significance (two tails)	0.48	0.895	0.283	0.583	0.484	0.869	0.023	0.517	0.847	0.34	0.003
p__Firmicutes__g__Lachnospira_350865	correlation	-0.094	-0.089	0.234	0.411	-0.787	0.132	0.105	0.694	-0.06	0.039	-0.515
	significance (two tails)	0.796	0.807	0.516	0.238	0.007	0.717	0.773	0.026	0.868	0.915	0.128
p__Firmicutes__g__Jeotgalicoccus__s__psychrophilus_336703	correlation	.	.	.	.	.	.	.	.	.	.	.
	significance (two tails)	.	.	.	.	.	.	.	.	.	.	.
p__Firmicutes__g__Granulicatella_521851	correlation	.	.	.	.	.	.	.	.	.	.	.
	significance (two tails)	.	.	.	.	.	.	.	.	.	.	.
p__Firmicutes__g__Faecalibacterium__s__prausnitzii_851865	correlation	0.206	0.136	0.222	0.107	0.055	0.789	-0.748	0.058	0.088	-0.158	0.547
	significance (two tails)	0.568	0.708	0.537	0.769	0.88	0.007	0.013	0.874	0.809	0.662	0.101
p__Firmicutes__g__Faecalibacterium__s__prausnitzii_514523	correlation	.	.	.	.	.	.	.	.	.	.	.
	significance (two tails)	.	.	.	.	.	.	.	.	.	.	.
p__Firmicutes__g__Eubacterium__s__dolichum_851715	correlation	.	.	.	.	.	.	.	.	.	.	.
	significance (two tails)	.	.	.	.	.	.	.	.	.	.	.
p__Firmicutes__g__Eubacterium__s__dolichum_587530	correlation	0.515	0.029	0.284	0.327	-0.387	0.481	-0.066	0.346	0.156	0.627	-0.314
	significance (two tails)	0.128	0.937	0.426	0.357	0.269	0.159	0.857	0.328	0.667	0.052	0.377
p__Firmicutes__g__Eubacterium__s__dolichum_579851	correlation	0.516	0.408	0.175	0.42	-0.149	0.57	-0.195	0.109	-0.069	0.582	-0.222
	significance (two tails)	0.127	0.242	0.628	0.227	0.681	0.086	0.589	0.764	0.85	0.078	0.537
p__Firmicutes__g__Eubacterium__s__dolichum_548587	correlation	.	.	.	.	.	.	.	.	.	.	.
	significance (two tails)	.	.	.	.	.	.	.	.	.	.	.
p__Firmicutes__g__Eubacterium__s__dolichum_493391	correlation	-0.094	-0.089	0.234	0.411	-0.787	0.132	0.105	0.694	-0.06	0.039	-0.515
	significance (two tails)	0.796	0.807	0.516	0.238	0.007	0.717	0.773	0.026	0.868	0.915	0.128
p__Firmicutes__g__Eubacterium__s__biforme_197105	correlation	.	.	.	.	.	.	.	.	.	.	.
	significance (two tails)	.	.	.	.	.	.	.	.	.	.	.
p__Firmicutes__g__Epulopiscium_298247	correlation	-0.044	-0.355	0.503	-0.175	0.346	-0.55	0.048	-0.462	-0.022	0.465	0.078
	significance (two tails)	0.903	0.314	0.139	0.629	0.327	0.1	0.896	0.179	0.952	0.176	0.831
p__Firmicutes__g__Enterococcus_766768	correlation	-0.73	-0.289	-0.225	-0.481	0.1	-0.142	0.058	-0.031	-0.328	-0.215	-0.363
	significance (two tails)	0.017	0.418	0.532	0.159	0.783	0.696	0.874	0.932	0.354	0.551	0.302
p__Firmicutes__g__Enterococcus_590982	correlation	-0.126	-0.634	-0.58	-0.608	0.465	-0.143	0.192	-0.246	-0.01	-0.331	0.077
	significance (two tails)	0.729	0.049	0.079	0.062	0.176	0.693	0.595	0.493	0.978	0.35	0.832
p__Firmicutes__g__Enterococcus_4316928	correlation	0.563	-0.155	0.369	0.412	-0.322	-0.275	0.225	0.161	0.03	0.652	-0.345
	significance (two tails)	0.09	0.668	0.294	0.237	0.364	0.441	0.531	0.656	0.934	0.041	0.329
p__Firmicutes__g__Enterococcus_295146	correlation	0.563	-0.155	0.369	0.412	-0.322	-0.275	0.225	0.161	0.03	0.652	-0.345
	significance (two tails)	0.09	0.668	0.294	0.237	0.364	0.441	0.531	0.656	0.934	0.041	0.329
p__Firmicutes__g__Enterococcus_1111582	correlation	-0.241	-0.666	0.305	-0.374	0.36	-0.377	-0.059	-0.366	-0.053	0.046	0.217
	significance (two tails)	0.503	0.036	0.391	0.287	0.306	0.284	0.871	0.299	0.884	0.901	0.547
p__Firmicutes__g__Dorea__s__formicigenerans_1076587	correlation	0.033	0.509	-0.149	-0.167	-0.149	0.547	-0.227	0.253	0.435	0.051	0.044
	significance (two tails)	0.929	0.133	0.682	0.645	0.681	0.102	0.529	0.481	0.209	0.889	0.904
p__Firmicutes__g__Dorea_659361	correlation	0.222	0.08	-0.169	-0.222	-0.299	-0.086	0.104	0.417	0.825	-0.078	0.129
	significance (two tails)	0.537	0.826	0.641	0.537	0.402	0.814	0.775	0.23	0.003	0.831	0.722
p__Firmicutes__g__Dorea_4383093	correlation	.	.	.	.	.	.	.	.	.	.	.
	significance (two tails)	.	.	.	.	.	.	.	.	.	.	.
p__Firmicutes__g__Dorea_364175	correlation	-0.815	0.055	-0.131	-0.186	-0.151	-0.072	0.095	0.11	-0.272	-0.483	-0.19
	significance (two tails)	0.004	0.881	0.719	0.607	0.676	0.842	0.795	0.761	0.447	0.157	0.598
p__Firmicutes__g__Dialister_246930	correlation	0.254	-0.048	0.377	0.198	0.251	0.06	-0.703	-0.233	-0.07	-0.338	0.833
	significance (two tails)	0.48	0.895	0.283	0.583	0.484	0.869	0.023	0.517	0.847	0.34	0.003
p__Firmicutes__g__Dialister_128382	correlation	0.563	-0.155	0.369	0.412	-0.322	-0.275	0.225	0.161	0.03	0.652	-0.345
	significance (two tails)	0.09	0.668	0.294	0.237	0.364	0.441	0.531	0.656	0.934	0.041	0.329
p__Firmicutes__g__Clostridium__s__perfringens_828483	correlation	0.238	0.837	-0.106	0.363	0.364	0.332	-0.286	-0.392	-0.445	0.181	0.061
	significance (two tails)	0.508	0.003	0.771	0.303	0.301	0.349	0.423	0.263	0.198	0.616	0.868
p__Firmicutes__g__Clostridium__s__perfringens_315982	correlation	.	.	.	.	.	.	.	.	.	.	.
	significance (two tails)	.	.	.	.	.	.	.	.	.	.	.
p__Firmicutes__g__Clostridium__s__perfringens_304779	correlation	-0.013	0.32	-0.528	-0.128	0.631	0.286	-0.235	-0.558	-0.568	-0.31	0.255
	significance (two tails)	0.972	0.367	0.117	0.724	0.05	0.423	0.513	0.094	0.087	0.383	0.476
p__Firmicutes__g__Clostridium__s__neonatale_523589	correlation	-0.746	-0.223	0.04	-0.455	0.522	-0.383	0.056	-0.609	-0.454	-0.207	0.106
	significance (two tails)	0.013	0.535	0.912	0.187	0.121	0.274	0.878	0.062	0.188	0.567	0.77
p__Firmicutes__g__Clostridium__s__difficile_606927	correlation	0.004	0.203	-0.787	-0.336	0.364	0.323	-0.13	-0.151	-0.019	-0.626	0.348
	significance (two tails)	0.99	0.574	0.007	0.343	0.301	0.362	0.721	0.678	0.957	0.053	0.324
p__Firmicutes__g__Clostridium__s__butyricum_541328	correlation	-0.214	0.096	0.617	0.029	0.329	-0.441	0.02	-0.516	-0.156	0.53	0.001
	significance (two tails)	0.553	0.791	0.058	0.937	0.353	0.202	0.956	0.126	0.667	0.115	0.999
p__Firmicutes__g__Clostridium__s__butyricum_238205	correlation	.	.	.	.	.	.	.	.	.	.	.
	significance (two tails)	.	.	.	.	.	.	.	.	.	.	.
p__Firmicutes__g__Clostridium_329073	correlation	0.238	0.837	-0.106	0.363	0.364	0.332	-0.286	-0.392	-0.445	0.181	0.061
	significance (two tails)	0.508	0.003	0.771	0.303	0.301	0.349	0.423	0.263	0.198	0.616	0.868
p__Firmicutes__g__Clostridium_2670715	correlation	.	.	.	.	.	.	.	.	.	.	.
	significance (two tails)	.	.	.	.	.	.	.	.	.	.	.
p__Firmicutes__g__Clostridium_193894	correlation	.	.	.	.	.	.	.	.	.	.	.
	significance (two tails)	.	.	.	.	.	.	.	.	.	.	.
p__Firmicutes__g__Butyricicoccus__s__pullicaecorum_1132942	correlation	.	.	.	.	.	.	.	.	.	.	.
	significance (two tails)	.	.	.	.	.	.	.	.	.	.	.
p__Firmicutes__g__Blautia__s__producta_696563	correlation	.	.	.	.	.	.	.	.	.	.	.
	significance (two tails)	.	.	.	.	.	.	.	.	.	.	.
p__Firmicutes__g__Blautia__s__producta_589313	correlation	.	.	.	.	.	.	.	.	.	.	.
	significance (two tails)	.	.	.	.	.	.	.	.	.	.	.
p__Firmicutes__g__Blautia__s__producta_587269	correlation	.	.	.	.	.	.	.	.	.	.	.
	significance (two tails)	.	.	.	.	.	.	.	.	.	.	.
p__Firmicutes__g__Blautia__s__producta_348362	correlation	.	.	.	.	.	.	.	.	.	.	.
	significance (two tails)	.	.	.	.	.	.	.	.	.	.	.
p__Firmicutes__g__Blautia_583089	correlation	.	.	.	.	.	.	.	.	.	.	.
	significance (two tails)	.	.	.	.	.	.	.	.	.	.	.
p__Firmicutes__g__Bacillus__s__flexus_656443	correlation	-0.094	-0.089	0.234	0.411	-0.787	0.132	0.105	0.694	-0.06	0.039	-0.515
	significance (two tails)	0.796	0.807	0.516	0.238	0.007	0.717	0.773	0.026	0.868	0.915	0.128
p__Firmicutes__g__Bacillus_574051	correlation	.	.	.	.	.	.	.	.	.	.	.
	significance (two tails)	.	.	.	.	.	.	.	.	.	.	.
p__Firmicutes__g__Anaerotruncus_311961	correlation	.	.	.	.	.	.	.	.	.	.	.
	significance (two tails)	.	.	.	.	.	.	.	.	.	.	.
p__Firmicutes__f__Ruminococcaceae_580521	correlation	.	.	.	.	.	.	.	.	.	.	.
	significance (two tails)	.	.	.	.	.	.	.	.	.	.	.
p__Firmicutes__f__Ruminococcaceae_554303	correlation	-0.293	-0.505	-0.637	-0.603	0.487	0.028	-0.008	-0.35	-0.304	-0.655	0.297
	significance (two tails)	0.412	0.136	0.048	0.065	0.153	0.938	0.983	0.321	0.394	0.04	0.404
p__Firmicutes__f__Ruminococcaceae_510295	correlation	.	.	.	.	.	.	.	.	.	.	.
	significance (two tails)	.	.	.	.	.	.	.	.	.	.	.
p__Firmicutes__f__Ruminococcaceae_367213	correlation	.	.	.	.	.	.	.	.	.	.	.
	significance (two tails)	.	.	.	.	.	.	.	.	.	.	.
p__Firmicutes__f__Ruminococcaceae_359175	correlation	.	.	.	.	.	.	.	.	.	.	.
	significance (two tails)	.	.	.	.	.	.	.	.	.	.	.
p__Firmicutes__f__Ruminococcaceae_350036	correlation	.	.	.	.	.	.	.	.	.	.	.
	significance (two tails)	.	.	.	.	.	.	.	.	.	.	.
p__Firmicutes__f__Ruminococcaceae_341724	correlation	.	.	.	.	.	.	.	.	.	.	.
	significance (two tails)	.	.	.	.	.	.	.	.	.	.	.
p__Firmicutes__f__Ruminococcaceae_309720	correlation	.	.	.	.	.	.	.	.	.	.	.
	significance (two tails)	.	.	.	.	.	.	.	.	.	.	.
p__Firmicutes__f__Ruminococcaceae_29495	correlation	.	.	.	.	.	.	.	.	.	.	.
	significance (two tails)	.	.	.	.	.	.	.	.	.	.	.
p__Firmicutes__f__Planococcaceae_934488	correlation	-0.627	0.022	-0.449	-0.205	-0.052	-0.262	0.484	0.053	-0.192	-0.41	-0.355
	significance (two tails)	0.052	0.953	0.193	0.569	0.887	0.465	0.156	0.885	0.595	0.239	0.314
p__Firmicutes__f__Lachnospiraceae_583974	correlation	-0.165	-0.223	-0.16	-0.378	0.131	0.375	-0.175	0.029	-0.063	0.154	-0.25
	significance (two tails)	0.649	0.535	0.659	0.281	0.718	0.286	0.629	0.936	0.863	0.67	0.486
p__Firmicutes__f__Lachnospiraceae_535601	correlation	0.093	0.056	-0.144	0.143	0.277	-0.116	-0.152	-0.057	0.035	-0.275	0.2
	significance (two tails)	0.798	0.879	0.691	0.694	0.438	0.75	0.676	0.876	0.922	0.442	0.579
p__Firmicutes__f__Lachnospiraceae_357312	correlation	0.254	-0.048	0.377	0.198	0.251	0.06	-0.703	-0.233	-0.07	-0.338	0.833
	significance (two tails)	0.48	0.895	0.283	0.583	0.484	0.869	0.023	0.517	0.847	0.34	0.003
p__Firmicutes__f__Lachnospiraceae_338992	correlation	.	.	.	.	.	.	.	.	.	.	.
	significance (two tails)	.	.	.	.	.	.	.	.	.	.	.
p__Firmicutes__f__Lachnospiraceae_2056188	correlation	-0.293	-0.505	-0.637	-0.603	0.487	0.028	-0.008	-0.35	-0.304	-0.655	0.297
	significance (two tails)	0.412	0.136	0.048	0.065	0.153	0.938	0.983	0.321	0.394	0.04	0.404
p__Firmicutes__f__Gemellaceae_858896	correlation	0.393	-0.024	0.044	0.366	0.12	-0.265	-0.04	0.026	0.053	0.055	0.028
	significance (two tails)	0.261	0.948	0.905	0.299	0.741	0.459	0.913	0.944	0.884	0.879	0.938
p__Firmicutes__f__Erysipelotrichaceae_592616	correlation	-0.815	0.055	-0.131	-0.186	-0.151	-0.072	0.095	0.11	-0.272	-0.483	-0.19
	significance (two tails)	0.004	0.881	0.719	0.607	0.676	0.842	0.795	0.761	0.447	0.157	0.598
p__Firmicutes__f__Erysipelotrichaceae_580008	correlation	0.233	0.6	-0.171	0.256	0.369	0.128	-0.129	-0.474	-0.439	-0.015	0.235
	significance (two tails)	0.518	0.067	0.636	0.475	0.294	0.724	0.723	0.167	0.204	0.967	0.513
p__Firmicutes__f__Erysipelotrichaceae_364722	correlation	.	.	.	.	.	.	.	.	.	.	.
	significance (two tails)	.	.	.	.	.	.	.	.	.	.	.
p__Firmicutes__f__Erysipelotrichaceae_145801	correlation	0.244	-0.046	-0.398	-0.028	0.013	-0.047	0.085	-0.023	0.005	-0.439	0.318
	significance (two tails)	0.497	0.9	0.255	0.939	0.973	0.896	0.816	0.95	0.99	0.204	0.371
p__Firmicutes__f__Clostridiaceae_551822	correlation	.	.	.	.	.	.	.	.	.	.	.
	significance (two tails)	.	.	.	.	.	.	.	.	.	.	.
p__Firmicutes__f__Clostridiaceae_359750	correlation	0.211	0.564	-0.06	0.31	0.434	0.36	-0.505	-0.317	-0.473	0.129	0.053
	significance (two tails)	0.559	0.09	0.87	0.384	0.21	0.307	0.136	0.372	0.168	0.722	0.885
p__Firmicutes__f__Clostridiaceae_338222	correlation	.	.	.	.	.	.	.	.	.	.	.
	significance (two tails)	.	.	.	.	.	.	.	.	.	.	.
p__Firmicutes__f__Clostridiaceae_325419	correlation	-0.287	-0.201	0.289	-0.27	0.376	-0.362	0.009	-0.42	-0.22	0.431	-0.19
	significance (two tails)	0.421	0.578	0.419	0.451	0.284	0.305	0.981	0.227	0.542	0.213	0.599
p__Firmicutes__f__Clostridiaceae_303809	correlation	-0.222	0.175	0.203	-0.324	0.128	-0.125	-0.046	-0.107	0.338	0.315	-0.028
	significance (two tails)	0.537	0.629	0.574	0.362	0.724	0.73	0.9	0.769	0.339	0.375	0.939
p__Firmicutes__f__Clostridiaceae_2225203	correlation	-0.425	-0.246	0.209	-0.384	0.678	-0.442	0.016	-0.78	-0.371	0.106	0.205
	significance (two tails)	0.221	0.494	0.563	0.274	0.031	0.201	0.965	0.008	0.291	0.772	0.571
p__Firmicutes__f__Clostridiaceae_171681	correlation	-0.356	-0.213	-0.021	-0.612	0.31	-0.111	-0.016	-0.215	0.172	0.171	-0.059
	significance (two tails)	0.313	0.554	0.953	0.06	0.384	0.759	0.966	0.55	0.635	0.637	0.871
p__Firmicutes__f__Clostridiaceae_171184	correlation	-0.185	0.072	-0.544	-0.548	0.261	-0.079	-0.002	-0.152	0.153	-0.436	0.259
	significance (two tails)	0.608	0.843	0.104	0.101	0.467	0.827	0.996	0.675	0.673	0.208	0.47
p__Firmicutes__f__Clostridiaceae_1625448	correlation	.	.	.	.	.	.	.	.	.	.	.
	significance (two tails)	.	.	.	.	.	.	.	.	.	.	.
p__Firmicutes__f__Clostridiaceae_1104963	correlation	-0.336	-0.555	-0.291	-0.397	0.034	-0.014	0.039	0.07	-0.291	-0.161	-0.325
	significance (two tails)	0.342	0.096	0.415	0.255	0.926	0.969	0.914	0.847	0.414	0.656	0.359
p__Firmicutes__f__Bacillaceae_551871	correlation	.	.	.	.	.	.	.	.	.	.	.
	significance (two tails)	.	.	.	.	.	.	.	.	.	.	.
p__Cyanobacteria__o__Streptophyta_1793401	correlation	.	.	.	.	.	.	.	.	.	.	.
	significance (two tails)	.	.	.	.	.	.	.	.	.	.	.
p__Cyanobacteria__o__Streptophyta_153978	correlation	.	.	.	.	.	.	.	.	.	.	.
	significance (two tails)	.	.	.	.	.	.	.	.	.	.	.
p__Cyanobacteria__o__Streptophyta_1141758	correlation	.	.	.	.	.	.	.	.	.	.	.
	significance (two tails)	.	.	.	.	.	.	.	.	.	.	.
p__Bacteroidetes__g__Sphingobacterium__s__mizutaii_537775	correlation	.	.	.	.	.	.	.	.	.	.	.
	significance (two tails)	.	.	.	.	.	.	.	.	.	.	.
p__Bacteroidetes__g__Prevotella__s__stercorea_347138	correlation	-0.815	0.055	-0.131	-0.186	-0.151	-0.072	0.095	0.11	-0.272	-0.483	-0.19
	significance (two tails)	0.004	0.881	0.719	0.607	0.676	0.842	0.795	0.761	0.447	0.157	0.598
p__Bacteroidetes__g__Prevotella__s__copri_568118	correlation	-0.023	0.761	-0.036	0.264	-0.098	0.392	0.146	0.011	-0.094	0.401	-0.393
	significance (two tails)	0.951	0.011	0.921	0.461	0.787	0.263	0.687	0.977	0.796	0.25	0.261
p__Bacteroidetes__g__Prevotella__s__copri_545061	correlation	-0.204	-0.077	-0.517	-0.266	-0.152	-0.279	0.886	0.009	-0.042	0.102	-0.58
	significance (two tails)	0.571	0.832	0.126	0.458	0.675	0.436	0.001	0.981	0.909	0.78	0.079
p__Bacteroidetes__g__Prevotella__s__copri_336372	correlation	.	.	.	.	.	.	.	.	.	.	.
	significance (two tails)	.	.	.	.	.	.	.	.	.	.	.
p__Bacteroidetes__g__Prevotella__s__copri_326482	correlation	-0.292	-0.035	-0.244	-0.248	-0.008	-0.462	0.878	-0.212	-0.107	0.326	-0.569
	significance (two tails)	0.413	0.924	0.497	0.489	0.982	0.179	0.001	0.556	0.768	0.357	0.086
p__Bacteroidetes__g__Prevotella__s__copri_174831	correlation	0.093	0.056	-0.144	0.143	0.277	-0.116	-0.152	-0.057	0.035	-0.275	0.2
	significance (two tails)	0.798	0.879	0.691	0.694	0.438	0.75	0.676	0.876	0.922	0.442	0.579
p__Bacteroidetes__g__Parabacteroides__s__distasonis_585914	correlation	0.311	-0.094	0.032	0.132	0.132	0.06	0.115	-0.073	0.211	0.119	0.142
	significance (two tails)	0.382	0.795	0.93	0.715	0.717	0.869	0.752	0.841	0.558	0.743	0.696
p__Bacteroidetes__g__Parabacteroides__s__distasonis_578016	correlation	-0.063	-0.081	-0.107	-0.189	-0.031	0.447	0.317	-0.013	0.147	0.224	-0.164
	significance (two tails)	0.863	0.824	0.768	0.601	0.932	0.195	0.372	0.973	0.686	0.534	0.65
p__Bacteroidetes__g__Parabacteroides__s__distasonis_577294	correlation	0.279	-0.107	0.139	0.03	-0.146	0.563	-0.072	0.205	0.437	0.153	0.174
	significance (two tails)	0.435	0.769	0.701	0.934	0.687	0.09	0.844	0.57	0.206	0.673	0.63
p__Bacteroidetes__g__Parabacteroides__s__distasonis_564140	correlation	0.165	-0.005	-0.091	0.121	0.055	0.207	0.204	-0.033	0.075	0.072	-0.01
	significance (two tails)	0.649	0.989	0.802	0.739	0.879	0.566	0.573	0.928	0.837	0.843	0.979
p__Bacteroidetes__g__Parabacteroides__s__distasonis_4365130	correlation	-0.021	-0.057	0.14	-0.15	-0.098	0.676	0.019	0.029	0.162	0.304	-0.03
	significance (two tails)	0.955	0.876	0.699	0.679	0.789	0.032	0.959	0.936	0.654	0.393	0.935
p__Bacteroidetes__g__Parabacteroides__s__distasonis_291090	correlation	0.037	-0.095	0.245	-0.103	-0.022	0.613	-0.119	-0.058	0.132	0.222	0.18
	significance (two tails)	0.918	0.794	0.494	0.778	0.951	0.059	0.744	0.873	0.716	0.538	0.618
p__Bacteroidetes__g__Parabacteroides__s__distasonis_2497335	correlation	0.191	-0.201	0.397	0.132	-0.028	0.065	0.168	-0.192	0.017	0.338	0.133
	significance (two tails)	0.597	0.577	0.257	0.715	0.938	0.859	0.643	0.595	0.962	0.339	0.713
p__Bacteroidetes__g__Parabacteroides__s__distasonis_2309802	correlation	-0.06	-0.239	0.226	-0.181	-0.025	0.225	0.281	-0.164	0.096	0.352	-0.023
	significance (two tails)	0.869	0.507	0.53	0.617	0.945	0.531	0.431	0.65	0.793	0.318	0.95
p__Bacteroidetes__g__Parabacteroides__s__distasonis_198190	correlation	-0.06	-0.239	0.226	-0.181	-0.025	0.225	0.281	-0.164	0.096	0.352	-0.023
	significance (two tails)	0.869	0.507	0.53	0.617	0.945	0.531	0.431	0.65	0.793	0.318	0.95
p__Bacteroidetes__g__Parabacteroides__s__distasonis_186233	correlation	0.194	0.101	-0.284	0.176	-0.023	0.166	0.291	0.072	0.034	0.003	-0.151
	significance (two tails)	0.591	0.781	0.427	0.627	0.95	0.647	0.414	0.844	0.926	0.994	0.677
p__Bacteroidetes__g__Parabacteroides__s__distasonis_174842	correlation	0.564	0.075	-0.168	0.208	0.029	0.187	-0.052	0.141	0.433	-0.121	0.336
	significance (two tails)	0.09	0.837	0.643	0.564	0.936	0.606	0.886	0.698	0.211	0.739	0.342
p__Bacteroidetes__g__Parabacteroides_198866	correlation	-0.163	-0.092	-0.15	-0.156	-0.408	0.461	0.549	0.257	0.093	0.305	-0.528
	significance (two tails)	0.654	0.8	0.68	0.668	0.242	0.18	0.1	0.473	0.797	0.392	0.117
p__Bacteroidetes__g__Parabacteroides_180082	correlation	-0.164	-0.208	-0.158	-0.282	-0.108	-0.015	0.723	-0.106	0.04	0.3	-0.364
	significance (two tails)	0.652	0.564	0.663	0.43	0.766	0.967	0.018	0.771	0.913	0.4	0.301
p__Bacteroidetes__g__Myroides__s__odoratimimus_579933	correlation	.	.	.	.	.	.	.	.	.	.	.
	significance (two tails)	.	.	.	.	.	.	.	.	.	.	.
p__Bacteroidetes__g__Dysgonomonas_606755	correlation	.	.	.	.	.	.	.	.	.	.	.
	significance (two tails)	.	.	.	.	.	.	.	.	.	.	.
p__Bacteroidetes__g__Dysgonomonas_364538	correlation	.	.	.	.	.	.	.	.	.	.	.
	significance (two tails)	.	.	.	.	.	.	.	.	.	.	.
p__Bacteroidetes__g__Butyricimonas_208479	correlation	0.254	-0.048	0.377	0.198	0.251	0.06	-0.703	-0.233	-0.07	-0.338	0.833
	significance (two tails)	0.48	0.895	0.283	0.583	0.484	0.869	0.023	0.517	0.847	0.34	0.003
p__Bacteroidetes__g__Bacteroides__s__uniformis_589071	correlation	0.261	0.046	0.34	0.459	0.157	0.159	-0.451	-0.108	-0.077	-0.24	0.563
	significance (two tails)	0.466	0.899	0.336	0.182	0.666	0.661	0.19	0.766	0.832	0.504	0.09
p__Bacteroidetes__g__Bacteroides__s__uniformis_572476	correlation	.	.	.	.	.	.	.	.	.	.	.
	significance (two tails)	.	.	.	.	.	.	.	.	.	.	.
p__Bacteroidetes__g__Bacteroides__s__uniformis_350277	correlation	-0.06	-0.239	0.226	-0.181	-0.025	0.225	0.281	-0.164	0.096	0.352	-0.023
	significance (two tails)	0.869	0.507	0.53	0.617	0.945	0.531	0.431	0.65	0.793	0.318	0.95
p__Bacteroidetes__g__Bacteroides__s__uniformis_197072	correlation	0.636	0.052	0.313	0.723	0.037	-0.417	-0.206	-0.018	-0.106	0.024	0.255
	significance (two tails)	0.048	0.887	0.378	0.018	0.92	0.231	0.568	0.961	0.77	0.948	0.478
p__Bacteroidetes__g__Bacteroides__s__plebeius_365496	correlation	0.447	0.08	0.174	0.194	-0.199	0.776	-0.611	0.371	0.433	-0.108	0.462
	significance (two tails)	0.195	0.825	0.63	0.592	0.581	0.008	0.061	0.291	0.211	0.767	0.179
p__Bacteroidetes__g__Bacteroides__s__plebeius_340476	correlation	0.352	0.313	0.349	0.489	-0.382	0.642	-0.661	0.433	0.143	-0.091	0.307
	significance (two tails)	0.319	0.378	0.324	0.151	0.276	0.046	0.037	0.212	0.694	0.802	0.388
p__Bacteroidetes__g__Bacteroides__s__plebeius_187388	correlation	0.043	0.215	-0.043	-0.035	-0.147	0.953	-0.344	0.276	0.173	0.091	-0.024
	significance (two tails)	0.907	0.551	0.906	0.923	0.685	0	0.33	0.441	0.633	0.802	0.947
p__Bacteroidetes__g__Bacteroides__s__ovatus_535375	correlation	0.304	-0.184	-0.171	0.125	-0.033	-0.04	0.429	0.034	-0.037	0.356	-0.409
	significance (two tails)	0.393	0.61	0.636	0.731	0.928	0.912	0.216	0.925	0.92	0.313	0.241
p__Bacteroidetes__g__Bacteroides__s__ovatus_308598	correlation	0.353	-0.153	-0.013	0.259	-0.17	-0.409	0.629	0.006	-0.021	0.395	-0.379
	significance (two tails)	0.317	0.673	0.972	0.469	0.638	0.24	0.052	0.988	0.954	0.258	0.28
p__Bacteroidetes__g__Bacteroides__s__ovatus_187443	correlation	0.507	0.107	-0.109	0.432	-0.288	0.11	0.341	0.242	0.019	0.329	-0.366
	significance (two tails)	0.134	0.769	0.764	0.213	0.42	0.762	0.335	0.5	0.958	0.354	0.298
p__Bacteroidetes__g__Bacteroides__s__fragilis_4386507	correlation	0.281	-0.233	0.108	0.102	-0.305	-0.237	0.666	0.056	0.038	0.636	-0.515
	significance (two tails)	0.432	0.517	0.765	0.779	0.391	0.51	0.035	0.877	0.917	0.048	0.128
p__Bacteroidetes__g__Bacteroides__s__fragilis_351231	correlation	0.279	-0.05	0.443	0.518	-0.407	-0.123	0.272	0.095	-0.223	0.437	-0.268
	significance (two tails)	0.436	0.891	0.2	0.125	0.243	0.735	0.447	0.794	0.535	0.206	0.454
p__Bacteroidetes__g__Bacteroides__s__fragilis_3474081	correlation	0.46	-0.255	0.434	0.268	-0.293	-0.127	0.337	0.058	0.074	0.744	-0.311
	significance (two tails)	0.182	0.478	0.21	0.454	0.411	0.728	0.341	0.874	0.838	0.014	0.381
p__Bacteroidetes__g__Bacteroides__s__fragilis_2200896	correlation	0.304	-0.16	-0.019	0.157	-0.327	-0.364	0.673	0.125	-0.001	0.544	-0.587
	significance (two tails)	0.393	0.659	0.959	0.666	0.356	0.301	0.033	0.73	0.998	0.104	0.074
p__Bacteroidetes__g__Bacteroides__s__fragilis_183603	correlation	0.38	-0.276	0.428	0.186	-0.258	-0.054	0.357	0.01	0.087	0.723	-0.273
	significance (two tails)	0.279	0.44	0.218	0.607	0.472	0.882	0.311	0.978	0.811	0.018	0.446
p__Bacteroidetes__g__Bacteroides__s__eggerthii_192111	correlation	0.254	-0.048	0.377	0.198	0.251	0.06	-0.703	-0.233	-0.07	-0.338	0.833
	significance (two tails)	0.48	0.895	0.283	0.583	0.484	0.869	0.023	0.517	0.847	0.34	0.003
p__Bacteroidetes__g__Bacteroides__s__coprophilus_522595	correlation	0.427	0.54	0.234	0.404	0.268	0.003	-0.625	-0.275	-0.095	-0.155	0.675
	significance (two tails)	0.219	0.107	0.515	0.247	0.454	0.994	0.054	0.442	0.794	0.668	0.032
p__Bacteroidetes__g__Bacteroides__s__coprophilus_2730944	correlation	0.359	0.271	0.279	0.265	0.121	-0.155	-0.54	-0.116	0.128	-0.241	0.697
	significance (two tails)	0.309	0.449	0.435	0.459	0.738	0.67	0.108	0.749	0.725	0.503	0.025
p__Bacteroidetes__g__Bacteroides__s__caccae_187324	correlation	0.425	-0.236	0.291	0.265	-0.194	-0.258	0.395	-0.068	-0.023	0.478	-0.133
	significance (two tails)	0.221	0.512	0.415	0.46	0.592	0.472	0.259	0.851	0.951	0.162	0.714
p__Bacteroidetes__g__Bacteroides_589277	correlation	-0.402	0.035	-0.032	-0.155	-0.04	0.564	-0.049	0.087	0.024	-0.137	-0.03
	significance (two tails)	0.25	0.923	0.93	0.669	0.913	0.09	0.893	0.812	0.947	0.707	0.935
p__Bacteroidetes__g__Bacteroides_583117	correlation	0.544	0.04	0.277	0.532	0.054	0.143	-0.231	0.019	0.058	0.137	0.236
	significance (two tails)	0.104	0.912	0.439	0.113	0.883	0.694	0.52	0.959	0.874	0.706	0.511
p__Bacteroidetes__g__Bacteroides_580629	correlation	0.611	0.105	0.399	0.769	-0.006	-0.402	-0.291	-0.057	-0.195	-0.055	0.38
	significance (two tails)	0.061	0.774	0.254	0.009	0.988	0.25	0.414	0.876	0.589	0.88	0.279
p__Bacteroidetes__g__Bacteroides_577170	correlation	-0.046	0.068	0.038	0.422	-0.143	-0.112	0.137	0.13	-0.194	-0.18	-0.117
	significance (two tails)	0.899	0.851	0.917	0.224	0.693	0.758	0.707	0.721	0.592	0.619	0.748
p__Bacteroidetes__g__Bacteroides_572010	correlation	.	.	.	.	.	.	.	.	.	.	.
	significance (two tails)	.	.	.	.	.	.	.	.	.	.	.
p__Bacteroidetes__g__Bacteroides_560336	correlation	0.361	0.094	0.07	0.475	0.222	-0.282	-0.259	-0.073	-0.063	-0.248	0.34
	significance (two tails)	0.305	0.796	0.848	0.165	0.538	0.431	0.47	0.842	0.863	0.489	0.337
p__Bacteroidetes__g__Bacteroides_550814	correlation	0.044	-0.119	0.027	0.004	0.239	0.053	0.06	-0.17	0.101	-0.004	0.17
	significance (two tails)	0.905	0.744	0.94	0.992	0.506	0.884	0.869	0.639	0.781	0.991	0.64
p__Bacteroidetes__g__Bacteroides_538296	correlation	.	.	.	.	.	.	.	.	.	.	.
	significance (two tails)	.	.	.	.	.	.	.	.	.	.	.
p__Bacteroidetes__g__Bacteroides_513445	correlation	-0.358	0.212	0.037	0.311	-0.16	0.112	-0.248	0.232	-0.257	-0.475	0.003
	significance (two tails)	0.309	0.557	0.919	0.382	0.658	0.757	0.49	0.52	0.474	0.165	0.993
p__Bacteroidetes__g__Bacteroides_4457872	correlation	0.563	-0.155	0.369	0.412	-0.322	-0.275	0.225	0.161	0.03	0.652	-0.345
	significance (two tails)	0.09	0.668	0.294	0.237	0.364	0.441	0.531	0.656	0.934	0.041	0.329
p__Bacteroidetes__g__Bacteroides_4455163	correlation	-0.815	0.055	-0.131	-0.186	-0.151	-0.072	0.095	0.11	-0.272	-0.483	-0.19
	significance (two tails)	0.004	0.881	0.719	0.607	0.676	0.842	0.795	0.761	0.447	0.157	0.598
p__Bacteroidetes__g__Bacteroides_4369878	correlation	0.611	0.105	0.399	0.769	-0.006	-0.402	-0.291	-0.057	-0.195	-0.055	0.38
	significance (two tails)	0.061	0.774	0.254	0.009	0.988	0.25	0.414	0.876	0.589	0.88	0.279
p__Bacteroidetes__g__Bacteroides_4357712	correlation	-0.815	0.055	-0.131	-0.186	-0.151	-0.072	0.095	0.11	-0.272	-0.483	-0.19
	significance (two tails)	0.004	0.881	0.719	0.607	0.676	0.842	0.795	0.761	0.447	0.157	0.598
p__Bacteroidetes__g__Bacteroides_4029632	correlation	-0.815	0.055	-0.131	-0.186	-0.151	-0.072	0.095	0.11	-0.272	-0.483	-0.19
	significance (two tails)	0.004	0.881	0.719	0.607	0.676	0.842	0.795	0.761	0.447	0.157	0.598
p__Bacteroidetes__g__Bacteroides_4015273	correlation	0.089	-0.219	0.387	-0.039	0.116	0.215	-0.154	-0.259	0.039	0.101	0.434
	significance (two tails)	0.807	0.543	0.269	0.916	0.75	0.551	0.67	0.469	0.914	0.78	0.21
p__Bacteroidetes__g__Bacteroides_364926	correlation	-0.191	0.139	0.153	0.149	-0.556	0.689	-0.083	0.517	-0.032	0.223	-0.482
	significance (two tails)	0.597	0.703	0.673	0.681	0.095	0.028	0.82	0.126	0.929	0.535	0.159
p__Bacteroidetes__g__Bacteroides_364903	correlation	.	.	.	.	.	.	.	.	.	.	.
	significance (two tails)	.	.	.	.	.	.	.	.	.	.	.
p__Bacteroidetes__g__Bacteroides_364029	correlation	-0.4	0.633	0.015	0.246	-0.048	0.408	-0.331	0.08	-0.345	-0.173	-0.136
	significance (two tails)	0.252	0.049	0.966	0.493	0.894	0.242	0.35	0.825	0.329	0.634	0.708
p__Bacteroidetes__g__Bacteroides_359538	correlation	0.522	-0.093	0.411	0.12	-0.311	0.485	-0.328	0.391	0.664	0.345	0.23
	significance (two tails)	0.122	0.799	0.238	0.74	0.381	0.155	0.355	0.263	0.036	0.33	0.522
p__Bacteroidetes__g__Bacteroides_357582	correlation	0.169	-0.282	0.355	-0.003	-0.152	0.098	0.349	-0.087	0.1	0.584	-0.158
	significance (two tails)	0.642	0.431	0.314	0.995	0.676	0.788	0.323	0.811	0.783	0.076	0.662
p__Bacteroidetes__g__Bacteroides_356827	correlation	.	.	.	.	.	.	.	.	.	.	.
	significance (two tails)	.	.	.	.	.	.	.	.	.	.	.
p__Bacteroidetes__g__Bacteroides_356052	correlation	.	.	.	.	.	.	.	.	.	.	.
	significance (two tails)	.	.	.	.	.	.	.	.	.	.	.
p__Bacteroidetes__g__Bacteroides_352825	correlation	.	.	.	.	.	.	.	.	.	.	.
	significance (two tails)	.	.	.	.	.	.	.	.	.	.	.
p__Bacteroidetes__g__Bacteroides_348304	correlation	0.678	0.011	0.34	0.718	-0.024	-0.426	-0.132	0.019	-0.079	0.154	0.148
	significance (two tails)	0.031	0.976	0.337	0.019	0.948	0.22	0.717	0.959	0.827	0.672	0.683
p__Bacteroidetes__g__Bacteroides_3472078	correlation	0.677	-0.072	0.443	0.631	-0.243	-0.375	0.046	0.097	-0.059	0.464	-0.098
	significance (two tails)	0.031	0.843	0.199	0.05	0.498	0.286	0.9	0.791	0.87	0.177	0.788
p__Bacteroidetes__g__Bacteroides_339013	correlation	.	.	.	.	.	.	.	.	.	.	.
	significance (two tails)	.	.	.	.	.	.	.	.	.	.	.
p__Bacteroidetes__g__Bacteroides_327050	correlation	.	.	.	.	.	.	.	.	.	.	.
	significance (two tails)	.	.	.	.	.	.	.	.	.	.	.
p__Bacteroidetes__g__Bacteroides_3154070	correlation	0.718	0.289	0.412	0.832	-0.124	0.314	-0.602	0.157	-0.08	0.012	0.405
	significance (two tails)	0.019	0.418	0.237	0.003	0.732	0.376	0.066	0.665	0.826	0.974	0.245
p__Bacteroidetes__g__Bacteroides_313764	correlation	0.093	0.056	-0.144	0.143	0.277	-0.116	-0.152	-0.057	0.035	-0.275	0.2
	significance (two tails)	0.798	0.879	0.691	0.694	0.438	0.75	0.676	0.876	0.922	0.442	0.579
p__Bacteroidetes__g__Bacteroides_312140	correlation	0.497	0.12	0.423	0.49	-0.14	0.588	-0.353	0.083	0.039	0.239	0.275
	significance (two tails)	0.144	0.74	0.223	0.151	0.699	0.074	0.317	0.82	0.914	0.507	0.441
p__Bacteroidetes__g__Bacteroides_305946	correlation	0.521	0.111	0.002	0.519	-0.013	-0.025	-0.035	0.122	0.021	0.069	0
	significance (two tails)	0.122	0.759	0.995	0.124	0.97	0.946	0.923	0.736	0.953	0.849	1
p__Bacteroidetes__g__Bacteroides_297057	correlation	0.563	-0.155	0.369	0.412	-0.322	-0.275	0.225	0.161	0.03	0.652	-0.345
	significance (two tails)	0.09	0.668	0.294	0.237	0.364	0.441	0.531	0.656	0.934	0.041	0.329
p__Bacteroidetes__g__Bacteroides_2740953	correlation	0.254	-0.048	0.377	0.198	0.251	0.06	-0.703	-0.233	-0.07	-0.338	0.833
	significance (two tails)	0.48	0.895	0.283	0.583	0.484	0.869	0.023	0.517	0.847	0.34	0.003
p__Bacteroidetes__g__Bacteroides_270094	correlation	-0.287	0.214	-0.176	-0.027	-0.013	0.59	-0.295	0.217	0.022	-0.317	0.013
	significance (two tails)	0.421	0.554	0.627	0.942	0.972	0.073	0.407	0.547	0.952	0.373	0.971
p__Bacteroidetes__g__Bacteroides_2563561	correlation	0.403	0.084	0.119	0.423	0.294	0.106	-0.609	-0.054	-0.048	-0.286	0.511
	significance (two tails)	0.248	0.818	0.744	0.223	0.409	0.771	0.062	0.881	0.895	0.423	0.131
p__Bacteroidetes__g__Bacteroides_2189140	correlation	.	.	.	.	.	.	.	.	.	.	.
	significance (two tails)	.	.	.	.	.	.	.	.	.	.	.
p__Bacteroidetes__g__Bacteroides_209685	correlation	.	.	.	.	.	.	.	.	.	.	.
	significance (two tails)	.	.	.	.	.	.	.	.	.	.	.
p__Bacteroidetes__g__Bacteroides_2061739	correlation	.	.	.	.	.	.	.	.	.	.	.
	significance (two tails)	.	.	.	.	.	.	.	.	.	.	.
p__Bacteroidetes__g__Bacteroides_205904	correlation	-0.363	0.377	-0.047	0.314	0.089	-0.165	-0.183	-0.072	-0.444	-0.499	0.082
	significance (two tails)	0.302	0.283	0.898	0.378	0.807	0.649	0.613	0.844	0.198	0.142	0.822
p__Bacteroidetes__g__Bacteroides_199716	correlation	.	.	.	.	.	.	.	.	.	.	.
	significance (two tails)	.	.	.	.	.	.	.	.	.	.	.
p__Bacteroidetes__g__Bacteroides_198449	correlation	0.611	0.105	0.399	0.769	-0.006	-0.402	-0.291	-0.057	-0.195	-0.055	0.38
	significance (two tails)	0.061	0.774	0.254	0.009	0.988	0.25	0.414	0.876	0.589	0.88	0.279
p__Bacteroidetes__g__Bacteroides_194909	correlation	-0.518	0.105	0.062	0.186	-0.154	-0.267	-0.046	0.083	-0.366	-0.509	-0.006
	significance (two tails)	0.125	0.773	0.864	0.607	0.671	0.457	0.899	0.82	0.298	0.133	0.986
p__Bacteroidetes__g__Bacteroides_193591	correlation	-0.174	0.088	0.266	0.385	-0.035	-0.276	-0.339	-0.028	-0.349	-0.517	0.362
	significance (two tails)	0.631	0.808	0.458	0.273	0.924	0.44	0.338	0.939	0.323	0.126	0.304
p__Bacteroidetes__g__Bacteroides_193233	correlation	0.54	-0.176	0.429	0.476	0	-0.202	0.1	-0.111	0.025	0.38	0.111
	significance (two tails)	0.107	0.628	0.216	0.164	0.999	0.576	0.782	0.761	0.946	0.279	0.761
p__Bacteroidetes__g__Bacteroides_192839	correlation	0.352	-0.28	0.422	0.16	-0.245	-0.032	0.36	-0.005	0.09	0.711	-0.259
	significance (two tails)	0.318	0.432	0.225	0.659	0.496	0.931	0.306	0.99	0.805	0.021	0.47
p__Bacteroidetes__g__Bacteroides_192684	correlation	.	.	.	.	.	.	.	.	.	.	.
	significance (two tails)	.	.	.	.	.	.	.	.	.	.	.
p__Bacteroidetes__g__Bacteroides_192055	correlation	0.249	-0.286	0.389	0.066	-0.193	0.045	0.36	-0.054	0.098	0.647	-0.203
	significance (two tails)	0.488	0.423	0.266	0.857	0.592	0.902	0.307	0.883	0.788	0.043	0.573
p__Bacteroidetes__g__Bacteroides_190638	correlation	0.563	-0.155	0.369	0.412	-0.322	-0.275	0.225	0.161	0.03	0.652	-0.345
	significance (two tails)	0.09	0.668	0.294	0.237	0.364	0.441	0.531	0.656	0.934	0.041	0.329
p__Bacteroidetes__g__Bacteroides_189384	correlation	-0.815	0.055	-0.131	-0.186	-0.151	-0.072	0.095	0.11	-0.272	-0.483	-0.19
	significance (two tails)	0.004	0.881	0.719	0.607	0.676	0.842	0.795	0.761	0.447	0.157	0.598
p__Bacteroidetes__g__Bacteroides_187841	correlation	0.425	0.312	0.195	0.431	-0.173	0.852	-0.576	0.283	0.079	0.071	0.205
	significance (two tails)	0.221	0.38	0.588	0.213	0.632	0.002	0.082	0.429	0.828	0.844	0.57
p__Bacteroidetes__g__Bacteroides_186841	correlation	0.454	0.4	-0.008	0.39	0.115	-0.068	0.112	-0.299	-0.345	0.337	-0.056
	significance (two tails)	0.187	0.252	0.983	0.265	0.751	0.852	0.757	0.402	0.329	0.341	0.878
p__Bacteroidetes__g__Bacteroides_184753	correlation	-0.815	0.055	-0.131	-0.186	-0.151	-0.072	0.095	0.11	-0.272	-0.483	-0.19
	significance (two tails)	0.004	0.881	0.719	0.607	0.676	0.842	0.795	0.761	0.447	0.157	0.598
p__Bacteroidetes__g__Bacteroides_183496	correlation	0.254	-0.048	0.377	0.198	0.251	0.06	-0.703	-0.233	-0.07	-0.338	0.833
	significance (two tails)	0.48	0.895	0.283	0.583	0.484	0.869	0.023	0.517	0.847	0.34	0.003
p__Bacteroidetes__g__Bacteroides_183480	correlation	-0.233	0.054	0.244	0.228	-0.425	0.534	-0.433	0.43	-0.096	-0.306	0.062
	significance (two tails)	0.517	0.881	0.498	0.527	0.22	0.112	0.212	0.215	0.793	0.39	0.865
p__Bacteroidetes__g__Bacteroides_182157	correlation	0.65	0.092	0.375	0.624	-0.071	0.332	-0.316	0.105	0.062	0.247	0.218
	significance (two tails)	0.042	0.8	0.285	0.054	0.845	0.349	0.374	0.772	0.864	0.491	0.546
p__Bacteroidetes__g__Bacteroides_175535	correlation	0.389	-0.065	0.293	0.434	0.177	-0.165	-0.085	-0.189	-0.024	0.018	0.354
	significance (two tails)	0.266	0.858	0.411	0.21	0.625	0.65	0.816	0.6	0.947	0.961	0.316
p__Bacteroidetes__g__Bacteroides_175485	correlation	0.689	-0.053	0.451	0.665	-0.222	-0.388	0.007	0.081	-0.077	0.415	-0.043
	significance (two tails)	0.028	0.884	0.191	0.036	0.538	0.267	0.985	0.824	0.832	0.233	0.905
p__Bacteroidetes__g__Bacteroides_161423	correlation	-0.094	-0.089	0.234	0.411	-0.787	0.132	0.105	0.694	-0.06	0.039	-0.515
	significance (two tails)	0.796	0.807	0.516	0.238	0.007	0.717	0.773	0.026	0.868	0.915	0.128
p__Bacteroidetes__g__Bacteroides_161007	correlation	-0.49	0.108	0.077	0.213	-0.152	-0.279	-0.057	0.08	-0.37	-0.506	0.008
	significance (two tails)	0.15	0.767	0.833	0.555	0.674	0.435	0.876	0.827	0.293	0.136	0.983
p__Bacteroidetes__f__Rikenellaceae_357046	correlation	0.254	-0.048	0.377	0.198	0.251	0.06	-0.703	-0.233	-0.07	-0.338	0.833
	significance (two tails)	0.48	0.895	0.283	0.583	0.484	0.869	0.023	0.517	0.847	0.34	0.003
p__Bacteroidetes__f__Rikenellaceae_199534	correlation	.	.	.	.	.	.	.	.	.	.	.
	significance (two tails)	.	.	.	.	.	.	.	.	.	.	.
p__Bacteroidetes__f__Cytophagaceae_555506	correlation	.	.	.	.	.	.	.	.	.	.	.
	significance (two tails)	.	.	.	.	.	.	.	.	.	.	.
p__Bacteroidetes__f__Barnesiellaceae_190975	correlation	.	.	.	.	.	.	.	.	.	.	.
	significance (two tails)	.	.	.	.	.	.	.	.	.	.	.
p__Bacteroidetes__f__Barnesiellaceae_183395	correlation	.	.	.	.	.	.	.	.	.	.	.
	significance (two tails)	.	.	.	.	.	.	.	.	.	.	.
p__Bacteroidetes__f__Barnesiellaceae_180133	correlation	.	.	.	.	.	.	.	.	.	.	.
	significance (two tails)	.	.	.	.	.	.	.	.	.	.	.
p__Actinobacteria__g__Rothia__s__mucilaginosa_903426	correlation	.	.	.	.	.	.	.	.	.	.	.
	significance (two tails)	.	.	.	.	.	.	.	.	.	.	.
p__Actinobacteria__g__Rothia__s__mucilaginosa_866280	correlation	-0.815	0.055	-0.131	-0.186	-0.151	-0.072	0.095	0.11	-0.272	-0.483	-0.19
	significance (two tails)	0.004	0.881	0.719	0.607	0.676	0.842	0.795	0.761	0.447	0.157	0.598
p__Actinobacteria__g__Eggerthella__s__lenta_682726	correlation	-0.126	-0.555	-0.073	-0.117	0.233	0.193	-0.11	-0.137	-0.376	-0.141	-0.017
	significance (two tails)	0.729	0.096	0.842	0.747	0.517	0.593	0.763	0.707	0.284	0.697	0.962
p__Actinobacteria__g__Collinsella__s__stercoris_329688	correlation	-0.815	0.055	-0.131	-0.186	-0.151	-0.072	0.095	0.11	-0.272	-0.483	-0.19
	significance (two tails)	0.004	0.881	0.719	0.607	0.676	0.842	0.795	0.761	0.447	0.157	0.598
p__Actinobacteria__g__Collinsella__s__aerofaciens_363794	correlation	0.232	-0.087	0.091	0.453	-0.339	-0.332	0.228	0.155	-0.2	-0.132	-0.032
	significance (two tails)	0.519	0.811	0.802	0.188	0.338	0.349	0.527	0.67	0.579	0.717	0.929
p__Actinobacteria__g__Bifidobacterium__s__longum_72820	correlation	-0.255	0.228	-0.044	0.34	-0.066	-0.319	0.355	-0.087	-0.441	-0.114	-0.278
	significance (two tails)	0.477	0.526	0.905	0.336	0.856	0.369	0.314	0.81	0.203	0.754	0.437
p__Actinobacteria__g__Bifidobacterium__s__adolescentis_370225	correlation	-0.392	0.004	0.181	0.012	0.075	-0.008	-0.444	-0.091	-0.243	-0.587	0.471
	significance (two tails)	0.262	0.992	0.616	0.973	0.836	0.983	0.198	0.802	0.498	0.074	0.17
p__Actinobacteria__g__Bifidobacterium__s__adolescentis_235262	correlation	0.137	-0.195	0.416	0.017	0.159	0.194	-0.303	-0.274	0.015	0.001	0.568
	significance (two tails)	0.706	0.59	0.232	0.963	0.661	0.591	0.395	0.444	0.966	0.998	0.087
p__Actinobacteria__g__Bifidobacterium_825808	correlation	-0.815	0.055	-0.131	-0.186	-0.151	-0.072	0.095	0.11	-0.272	-0.483	-0.19
	significance (two tails)	0.004	0.881	0.719	0.607	0.676	0.842	0.795	0.761	0.447	0.157	0.598
p__Actinobacteria__g__Bifidobacterium_553611	correlation	.	.	.	.	.	.	.	.	.	.	.
	significance (two tails)	.	.	.	.	.	.	.	.	.	.	.
p__Actinobacteria__g__Bifidobacterium_132041	correlation	-0.537	-0.204	-0.275	-0.368	0.243	0.267	-0.353	-0.149	-0.315	-0.778	0.405
	significance (two tails)	0.109	0.572	0.441	0.296	0.499	0.456	0.318	0.682	0.375	0.008	0.245
p__Actinobacteria__g__Arthrobacter__s__sanguinis_1128226	correlation	-0.668	-0.025	-0.476	-0.319	-0.211	-0.258	0.735	0.076	-0.203	-0.226	-0.562
	significance (two tails)	0.035	0.946	0.164	0.369	0.559	0.472	0.016	0.835	0.575	0.53	0.091
p__Actinobacteria__g__Arthrobacter_463861	correlation	.	.	.	.	.	.	.	.	.	.	.
	significance (two tails)	.	.	.	.	.	.	.	.	.	.	.
p__Actinobacteria__g__Actinomyces_1047077	correlation	-0.815	0.055	-0.131	-0.186	-0.151	-0.072	0.095	0.11	-0.272	-0.483	-0.19
	significance (two tails)	0.004	0.881	0.719	0.607	0.676	0.842	0.795	0.761	0.447	0.157	0.598
